# Supplementary material for: Family caregivers’ experience of care with a child with cerebral palsy: the lived experiences and challenges of caregivers in a resource-limited setting in northern Ghana
Source: PubMed Central journal article supplement — BMJ Paediatr Open. 2023 Jul 5;7(1):e001807. doi: 10.1136/bmjpo-2022-001807 (PMC10335558; doi:10.1136/bmjpo-2022-001807), 2023-07-05
Supplement: bmjpo-2022-001807.draft_revisions.pdf [file bmjpo-2022-001807.draft_revisions.pdf]

# BMJ Paediatrics Open

BMJ Paediatrics Open is committed to open peer review. As part of this commitment we make the peer review history of every article we publish publicly available.

When an article is published we post the peer reviewers' comments and the authors' responses online. We also post the versions of the paper that were used during peer review. These are the versions that the peer review comments apply to.

The versions of the paper that follow are the versions that were submitted during the peer review process. They are not the versions of record or the final published versions. They should not be cited or distributed as the published version of this manuscript.

BMJ Paediatrics Open is an open access journal and the full, final, typeset and author-corrected version of record of the manuscript is available on our site with no access controls, subscription charges or pay-per-view fees (<http://bmjpaedsopen.bmj.com>).

If you have any questions on BMJ Paediatrics Open's open peer review process please email [info.bmjpo@bmj.com](mailto:info.bmjpo@bmj.com)

# BMJ Paediatrics Open

## **Caring for a child with cerebral palsy: A qualitative exploration of challenges faced by caregivers of children with Cerebral palsy in a resource-constraint environment.**

|                               |                                                                                                                                                                                                                                                                                                                                                                                                                              |
|-------------------------------|------------------------------------------------------------------------------------------------------------------------------------------------------------------------------------------------------------------------------------------------------------------------------------------------------------------------------------------------------------------------------------------------------------------------------|
| Journal:                      | <i>BMJ Paediatrics Open</i>                                                                                                                                                                                                                                                                                                                                                                                                  |
| Manuscript ID                 | bmjpo-2022-001807                                                                                                                                                                                                                                                                                                                                                                                                            |
| Article Type:                 | Original research                                                                                                                                                                                                                                                                                                                                                                                                            |
| Date Submitted by the Author: | 04-Dec-2022                                                                                                                                                                                                                                                                                                                                                                                                                  |
| Complete List of Authors:     | Mwinbam, Mavis Mallory; Nadowli District Hospital, Upper West Region, Ghana, Department of Nursing<br>Suglo, Joseph Ngmenesegre; Presbyterian University College, Department of Nursing and Midwifery<br>Agyeman, Yaa Nyarko; University for Development Studies, Department of Population and Reproductive Health<br>Kukeba, Margaret Wekem; C K Tadam University of Technology and Applied Sciences, Department of Nursing |
| Keywords:                     | Qualitative research                                                                                                                                                                                                                                                                                                                                                                                                         |
|                               |                                                                                                                                                                                                                                                                                                                                                                                                                              |

SCHOLARONE™  
Manuscripts

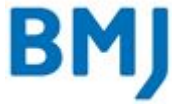

I, the Submitting Author has the right to grant and does grant on behalf of all authors of the Work (as defined in the below author licence), an exclusive licence and/or a non-exclusive licence for contributions from authors who are: i) UK Crown employees; ii) where BMJ has agreed a CC-BY licence shall apply, and/or iii) in accordance with the terms applicable for US Federal Government officers or employees acting as part of their official duties; on a worldwide, perpetual, irrevocable, royalty-free basis to BMJ Publishing Group Ltd ("BMJ") its licensees and where the relevant Journal is co-owned by BMJ to the co-owners of the Journal, to publish the Work in this journal and any other BMJ products and to exploit all rights, as set out in our [licence](#).

The Submitting Author accepts and understands that any supply made under these terms is made by BMJ to the Submitting Author unless you are acting as an employee on behalf of your employer or a postgraduate student of an affiliated institution which is paying any applicable article publishing charge ("APC") for Open Access articles. Where the Submitting Author wishes to make the Work available on an Open Access basis (and intends to pay the relevant APC), the terms of reuse of such Open Access shall be governed by a Creative Commons licence – details of these licences and which [Creative Commons](#) licence will apply to this Work are set out in our licence referred to above.

Other than as permitted in any relevant BMJ Author's Self Archiving Policies, I confirm this Work has not been accepted for publication elsewhere, is not being considered for publication elsewhere and does not duplicate material already published. I confirm all authors consent to publication of this Work and authorise the granting of this licence.

**Title:** Caring for a child with cerebral palsy: A qualitative exploration of challenges faced by caregivers of children with cerebral palsy in a resource-constraint environment.

**Authors:** Mavis Mallory Mwinbam<sup>1</sup>, Joseph Ngmenesegre Suglo<sup>2\*</sup>, Yaa Nyarko Agyeman<sup>3</sup>, Margaret Wekem Kukeba<sup>4</sup>

### **Institutional affiliations**

<sup>1</sup>Department of Nursing, Nadowli District Hospital, Upper West Region, Ghana

<sup>2</sup>Department of Nursing and Midwifery, Presbyterian University, Ghana.

<sup>3</sup>Department of Population and Reproductive Health, School of Public Health, University for Development Studies

<sup>4</sup>Department of Nursing, CK Tadam University of Technology and Applied Sciences

\*Correspondence: suglojoseph@gmail.com

### **Abstract**

#### **Introduction**

Caring for a child with cerebral palsy could be more emotionally and physically demanding than taking care of a typically growing child. The task could even be more challenging in limited resource settings with insufficient support services. Family caregivers' perspective of this phenomenon needs exploring to facilitate the development of innovative services. The study explored the challenges faced by family caregivers of children with Cerebral palsy in a resource-poor context in Northern Ghana.

#### **Methods:**

A qualitative phenomenological approach using content analysis of individual face-to-face in-depth interviews. Participants included family caregivers (n = 13) of children with cerebral palsy seeking health care services in a referral Hospital in Ghana.

#### **Results:**

The results show that caregivers encounter challenges that are categorised as socio-cultural, sheer physical care burden and economic challenges. Caregivers describe caring for the child with cerebral palsy as a daunting task. Most caregivers lamented that they encountered social discriminations and lack of family and societal support, as they were isolated, had poor access to health information and education, financial constraints, and loss of businesses and jobs.

#### **Conclusion:**

Caregivers have an arduous task of caring for the child with cerebral palsy. They experienced some context-based challenges that warrant that health care systems and policy makers develop support systems that ameliorate the plight of caregivers.

**Key words:** cerebral palsy; caregivers; family; challenges; Ghana

## 35 Introduction

36 Cerebral palsy (CP) is a major cause of childhood disability affecting function and development  
37 (1). CP, a non- progressive lifelong neurodevelopmental disorder results from a brain injury  
38 that occurs before the completion of cerebral development in the developing foetus or infant  
39 (1). The risk factors associated with the development of CP occurs before, during or after  
40 pregnancy. These risk factors may include intrauterine hypoxia, premature rupture of  
41 membranes, abnormalities of the placenta, preterm or post-term birth, asphyxia, prolonged  
42 labour, meconium aspiration syndrome, infections, hypoglycaemia, intracranial haemorrhage  
43 and respiratory distress syndrome (2). CP is estimated to occur in approximately 2.11 per 1000  
44 live births globally (3), affecting males more than females (4) with a greater number in low-  
45 income countries (LIC) (1,5,6).

46 In the Ghanaian context, official statistics on the number of children with CP is lacking,  
47 however, Cerebral Palsy Africa (CPA) estimated that one child per 300 births has CP in Ghana  
48 (7). The effects of CP on the growing child are enormous ranging from permanent disorders in  
49 movement and posture to activity limitation. The motor disorders of CP are frequently  
50 accompanied by impaired cognition, communication, sensation, perception, behavioural  
51 abnormalities, seizure disorders, or musculoskeletal problems or a combination of these  
52 features (8,9). The condition adversely affects children's daily living experiences and limit  
53 their self-care functions such as feeding, dressing, bathing, and mobility (10,11). Because of  
54 the functional limitations experienced, some children with CP are dependent on others for  
55 assistance with daily activities, which leads to long-term caregiving that far exceeds the usual  
56 needs of typically developing children (8,12,13). Coping and providing the high level of care  
57 required by a child with long-term functional limitations and dependence may be the greatest  
58 challenge of caregivers at home. Care provision therefore stands as a burdensome daunting  
59 task that impact on the physical and psychological health of the caregiver at home (8,14). The  
60 situation could be worse in poor-resourced settings where infrastructural amenities, social  
61 support and health care systems are not properly developed to ameliorate the plight of  
62 caregivers of children with CP (8,15). Therefore, the study was design to explore the challenges  
63 faced by family caregivers of children with Cerebral palsy in a resource-poor context in  
64 Northern Ghana. This will serve as basis for developing context relevant support services and  
65 policy initiatives to better the lives of caregivers and their children with CP.

66

## 67 **Methods**

68 A qualitative phenomenological design was applied in exploring the challenges of caregivers  
69 of children with cerebral palsy. Phenomenological principles were used as a better approach  
70 for unearthing the experiences of the caregiver in their caregiving role as it provides a better  
71 understanding of the caregiver perspective. This also facilitates the development of a composite  
72 description of the essence of the experience for the individual (16). The consolidated criteria  
73 for reporting qualitative studies (COREQ) was followed to ensure standard reporting of the  
74 research findings (17)

## 75 **Participants and Setting**

76 Thirteen family caregivers of children with CP participated in the study. We included  
77 individuals if they resided with and provided care on daily basis for a child less than 18 years  
78 of age, diagnosed by a qualified medical doctor, and confirmed in their medical records to have  
79 CP. The recruitment of participants took place at a physiotherapy unit of the Tamale Teaching  
80 Hospital, the only tertiary hospital in the Northern region of Ghana. The hospital provides  
81 specialist care and physiotherapy services for children with diverse needs including CP. Most  
82 of the inhabitants in this setting are Muslims, but also practice and revere the traditional African  
83 religion as well. Thus, they believe in their ancestors and their supernatural powers (18) and  
84 this could sometimes influence their perceptions about disease causation and management.  
85 Wholesale, retail and agricultural activities are the main occupation in the area (19).

## 86 **Sampling and recruitment**

87 Based on the concept of data saturation (20,21), a purposive non-probability sampling  
88 technique was adopted to recruit participants for the study. All participants were recruited  
89 during their routine physiotherapy clinic appointment days. We observed COVID19 protocols  
90 (maintaining of social distancing, wearing of Personal Protective Equipment (PPE) such as  
91 nose mask or face shield and use of hand sanitizers) during participants recruitment and data  
92 collection. We confirmed participants' inclusion by checking diagnoses from children's  
93 hospital records with the help of a physiotherapist to ensure that children had been duly  
94 diagnosed by a medical professional. We introduced the study aims and informed potential  
95 participants that involvement in the study was voluntary. Participants who expressed interest  
96 in joining the study were then provided with further information using the information sheet.  
97 We guided participants who consented to take part in the research to sign/thump print the  
98 consent form. MMM conducted all recruitment procedures.

## 99 **Data collection**

100 Completion of demographic information preceded oral interviews for all consenting  
101 participants. We conducted individual face-to-face interviews using an in-depth interviews  
102 guide. We asked Probing questions based on the responses of each participant. These  
103 interviews were either conducted in English language or the native language (Dagbani) at the  
104 hospital clinic based on the preferences of participants. All interviews were audio recorded and  
105 each lasted for about 35-50 minutes. we wrote additional field notes to cover the observations  
106 made on each interviewee and these were considered during analysis for contextual issues. We  
107 conducted most interviews in the local Dagbani language, and translated verbatim transcripts  
108 were verified by a bilingual expert to ensure accuracy (22)

## 109 **Data analysis**

110 With the permission of participants, all interviews were audio recorded and verbatim  
111 transcription done. Inductive content analysis as described by Elo and colleague (23) was used  
112 to analyse the data of this study. Content analysis is a systematic, replicable technique for  
113 compressing many words of text into fewer content categories based on explicit rules of coding.  
114 We manually transcribed recorded audio of interviews with participants verbatim into  
115 electronic text on a computer, taking cognisance of non-verbal cues captured in the field notes.  
116 We translated audio records in the local language (Dagbani) into the English language back-  
117 to-back to ensure we did not lose the meaning and was cross-checked between researchers for  
118 validation. Participants transcripts were anonymized with letters and numbers such as 'P1',  
119 'P2'. All authors then read the transcripts severally and compared samples with the interview  
120 audios files. We generated the codes inductively by highlighting key ideas from data. We then  
121 copied these codes and grouped them to form subcategories based on how they were related.  
122 We further grouped subcategories with similar meanings to form categories. We reviewed and  
123 compared categories and sub-categories with the code and entire dataset to ensure that we  
124 captured the meaning of the entire dataset as presented by participants in the interviews.

## 125 **Ethical considerations**

126 Our study was of low risk to children and the caregivers. However, we observed all relative  
127 ethical issues including maintaining privacy and confidential, upholding autonomy of  
128 caregivers, occasioning voluntary involvement and obtaining informed consent. We also  
129 involved third party to assess our ethical conduct and provide ethical clearance. We therefore  
130 obtained ethical approval from the Committee on Human Research, Publication and Ethics

1  
2  
3 131 (CHRPE) of Kwame Nkrumah University of Science and Technology (KNUST), Ghana with  
4  
5 132 reference number CHRPE/AP/231/21 and the Department of Research and Development of the  
6  
7 133 Tamale Teaching Hospital with reference number TTH/R&D/SR/039, who also provided  
8  
9 134 administrative permission for the study setting.

## 11 Findings

12 135  
13  
14 136 We interviewed thirteen (13) family caregivers to generate data for understanding their  
15  
16 137 perspectives of the challenges they face caring for children with CP. All caregivers were  
17  
18 138 women, out of which 12(92%) were biological parents to the child with CP. Majority were  
19  
20 139 middle aged women and ages ranged from 30-68 years, with a mean age of thirty-nine. Most  
21  
22 140 10(77%) of the children were between 2-4 years old. Table 1 presents the detail demographic  
23  
24 141 information of participants.

25 142 *Table 1: Demographic Characteristics of Participants*

| Demographics                 | Frequency (n) | Percentage (%) |
|------------------------------|---------------|----------------|
| Caregiver relationship       |               |                |
| Mother                       | 12            | 92             |
| Grandmother                  | 1             | 8              |
| Age of caregiver             |               |                |
| 30-39                        | 10            | 76             |
| 40-49                        | 1             | 8              |
| 50-59                        | 1             | 8              |
| 60-69                        | 1             | 8              |
| Mean age                     | 39            |                |
| Educational level caregiver  |               |                |
| SHS and below                | 4             | 31             |
| Tertiary                     | 6             | 46             |
| No formal education          | 3             | 23             |
| Occupation of Caregiver      |               |                |
| Trading                      | 5             | 38             |
| Nurse                        | 2             | 15             |
| Teacher                      | 1             | 8              |
| Environmental health officer | 1             | 8              |
| Unemployed                   | 4             | 31             |
| Marital status of caregiver  |               |                |
| Married                      | 11            | 84             |



|                      |    |    |
|----------------------|----|----|
| Single               | 1  | 8  |
| Widow                | 1  | 8  |
| Age of child with CP |    |    |
| <2 years             | 2  | 15 |
| 2-4                  | 10 | 77 |
| 5-7                  | 1  | 8  |
| Type of CP           |    |    |
| Spastic              | 5  | 38 |
| Not stated           | 8  | 62 |

Three main categories namely, socio-cultural issues, sheer physical care burden and economic challenges emerged from the data and are detailed in Figure 1.

Fig 1: Categories of challenges faced by caregivers

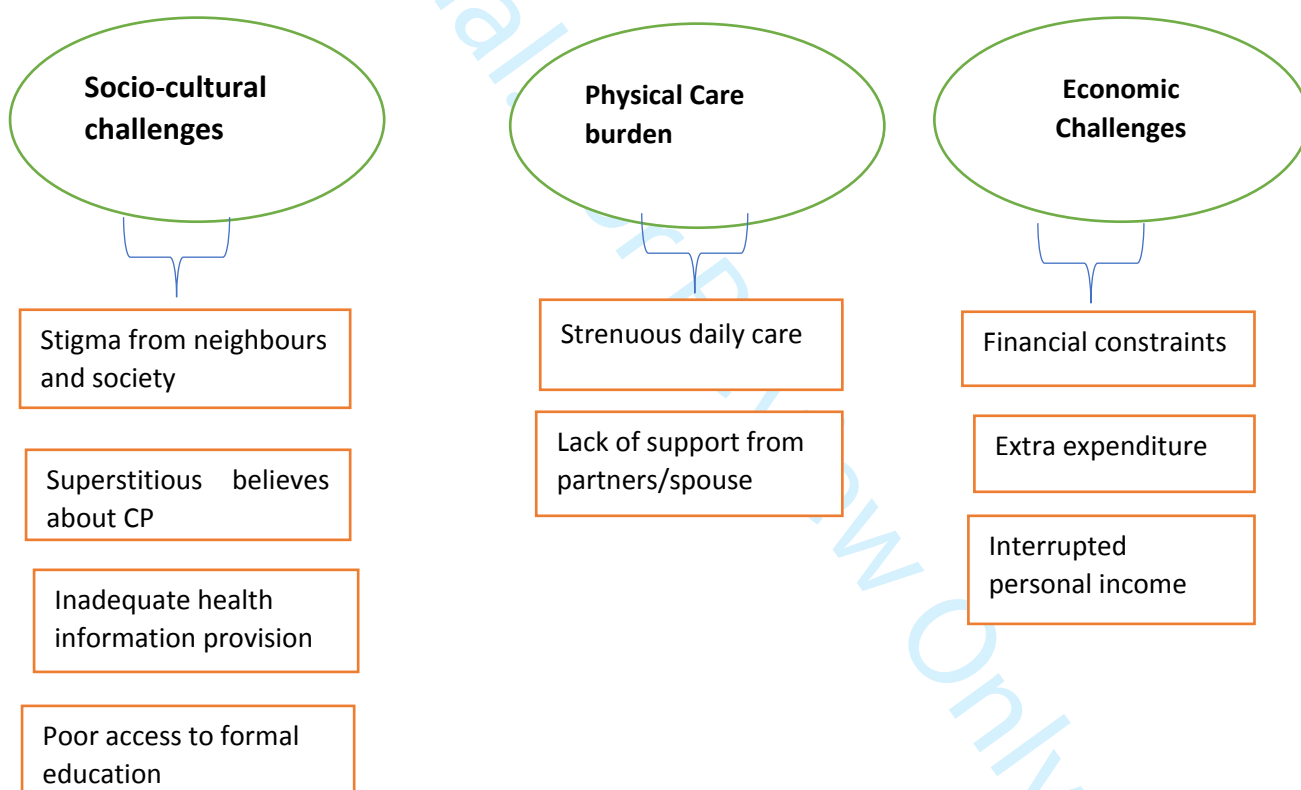

### Socio-cultural challenges

Social cultural challenges emerged as a major category from the data and describing the relationships and difficulties encountered by caregivers as they interact with society and formal institutions on issues related to their child with CP. The results depict the cultural and intuitive beliefs of society about CP and its impact on caregivers. Caregivers also reported how the

1  
2  
3 167 socio-cultural viewpoints make the society hostile towards them and living with a child with  
4  
5 168 CP challenging. Salient challenges narrated by caregivers include stigma, misconceptions  
6  
7 169 about CP, inadequate health care services, and problems of accessibility to formal education.  
8

9 170 *Stigma from others:*

10 171 Caregivers recounted how they felt ashamed and humiliated by society because of their child's  
11  
12 172 condition, CP. Caregivers spoke of how their children were described in foul language such as  
13  
14 173 not being human being but as snakes by neighbours and friends. For instance, according to  
15  
16 174 p11, the caregiver of a 2-year-old child with CP, she is unable to attend social gatherings  
17  
18 175 because of the manner in which her child is addressed as shown in their statement.

19  
20 176 *Whenever there is an 'occasion' (marriage, naming ceremonies and funerals), I do not*  
21 177 *go because of the way they treat the child, I don't like it. People will just be calling her*  
22 178 *all sort of names saying she is not human being so I should not waste my time on her*  
23 179 *(p11, caregiver of a 2year old girl).*

25 180 Like p11 account, p6 also demonstrate that the attitudes of society towards their child's CP  
26 181 makes her feel that she is a subject of ridicule. She suggests that even though people in her  
27 182 circles know about her child's condition, suggesting that the child may not be able to walk  
28 183 independently they continue to ask questions about her child not walking just to spite her as  
29 184 she recounts in the quote below;

32 185 *We are now laughing stock to most people, some people know what the child is going*  
33 186 *through, and they will see you and intentionally ask you, so your child is still not*  
34 187 *walking 'enh'? Sometimes in a car like this, they do not even want you to sit closer to*  
35 188 *them or the child should touch them... (P6 caregiver of a 2year boy).*

37 189 Other caregivers also felt that there were discriminations against their children, as they were  
38 190 not allowed to associate with other children. Thus, both child and caregiver could not freely  
39 191 relate with others due to the emotional trauma and stigmatisation from others. Such constraints  
40 192 encountered by caregivers observed in their sample narrations are as follows:

45 193 *As for discrimination, it exists. Some relatives do not allow their children closer to my*  
46 194 *child because they feel that he is not normal (p5 caregiver of a 7year boy).*

48 195 A caregiver added that the challenges in caring for a child with CP in the community is  
49 196 compounded by community members believe that CP is a result of punishment from the gods,  
50 197 and others say children with CP were spirits. According to them, such claims provoke  
51 198 emotional pain. It also appears such perceptions compel caregivers to seek cure, and on whether  
52 199 the children were actually spirits or are punished by the gods from spiritualist.

57 200 *Others make insulting remarks like, this your child is not a human being. We have even*  
58 201 *visited a shrine on several occasions because of that... They will give herbal*  
59 202 *preparation to bath the child and if he is really not human, then he will die after bathing*

1  
2  
3 203 *those herbs. But after bathing him, it is clear that he is not what they were thinking of*  
4 204 *(p3 caregiver of a 4year, 9months boy)*

6 205 *Inadequate health information provision:*

8 206 Adequate information on CP and optimal care strategies could reduce the challenges caregivers  
9 207 face. However, the data show that caregivers did not feel they were given enough information  
10 208 by health care professional to enable them to understand, cope and care for their child. The lack  
11 209 of information appeared to make some caregivers believe in the community's claims about  
12 210 their child and confused the exact nature of their child condition. As shown by p5, even though  
13 211 health workers took history from them about their child's condition, the health workers failed  
14 212 to give them information about the condition. Indeed, due to this limited information giving, it  
15 213 appears caregivers with English literacy and could surf the internet resorted to finding  
16 214 information about their child's condition themselves as demonstrated by caregiver p6.

24 215 *They asked me questions some time ago about the child's condition which they wrote down,*  
25 216 *but I have not been given any information regarding his condition since then... they only said*  
26 217 *we should come to this place (referring to physio unit) and do the exercise (p5, caregiver of a*  
27 218 *7year boy).*

29 219 Meanwhile, caregivers appeared to suggest that they had to persistently demand for information  
30 220 about their child's condition without success. Even though P6 reports show that the internet  
31 221 has helped them to understand their child's condition better, finding information from the  
32 222 internet that is not censored could be misleading as there are sources that may not be credible.  
33 223 Thus, lack of adequate information from health workers could compel caregivers to sources of  
34 224 information that may lead to practices harmful to the child.

40 225 *At first, I didn't know what was wrong with him, because the doctors will not give you*  
41 226 *more information about this condition...Now I'm beginning to understand because I*  
42 227 *just browse and read about it. . . . (p6, caregiver of a 2year boy).*

45 228 *Poor access to formal education:*

46 229 Another challenge encountered by caregivers was the fact that they could not find a suitable  
47 230 school that would render quality education for their children. Some mothers felt their children  
48 231 would not be accepted into the mainstream due to their condition, and special schools were not  
49 232 also available for them. It thus appears all schools that were within the reach of caregivers were  
50 233 not resourced to admit children with special needs like CP. Some community members who  
51 234 seem not to know the depth of the child schooling problem kept recommending that the child  
52 235 be taken to school. See the following expressions of p11.

58 236 *They said I should take her to school but in our place, they won't admit her. They said she*  
59 237 *cannot sit, and she cannot walk... When you send her to these normal schools, they will not*

238 *take her. And there is no school too in our area that train such children (p11, caregiver of a*  
239 *3year old girl).*

240 **Sheer physical care burden:**

241 Caregivers also recounted the challenges with providing activities of daily living such as the  
242 bathing, dressing, and moving their child among others, whilst maintaining their routine  
243 responsibilities to themselves and other members of the family such as other children mostly  
244 without support from others.

245 **Strenuous daily care**

246 Caregivers lamented about the exhausting nature of caring for a child with CP. Due to the  
247 physical and neurological incapacities of the child, they depend exclusively on their caregivers  
248 to meet all their needs. Most participants of this study experienced struggles in meeting the  
249 demands of children's daily care. Caregivers' reports appear to indicate that lifting and moving  
250 their children were particularly challenging as it affected their wellbeing as stated by p3 and  
251 p5.

252 *I usually feel tired due to carrying him always. It is actually a problem lifting him. I*  
253 *sometimes get some body pains as a result of carrying him because he will not sit, so*  
254 *all the time am carrying him. I pray he is able to walk someday, if not, he will be a*  
255 *burden while he is growing up because I can't be carrying him (p3, caregiver of a*  
256 *4year, 9months boy).*

257 *I feel so tired of taking care of him because he has a younger sibling who I equally have*  
258 *to cater for. At his age (7years), he should have been able to bath and move about, but*  
259 *I have to still be doing it (p5, caregiver of a 7year boy).*

260 Caregivers expressed experiencing pains and having to depend on pain medications to relieve  
261 themselves due to the strenuous nature of the care they have to provide for their child with CP.  
262 Caregivers also commented that the care became more challenging as their child grew older,  
263 as younger children were easier to manage. It appears as seen in the statement of p8, that the  
264 difficulty with the care is associated with having to lift and move the children, as the grow  
265 physically and increase in size and weight. Indeed, increase in size and weight would make the  
266 care of a child more demanding, however, for the child with CP who have neurodevelopment  
267 challenges normally limp and with flappy body parts, and involuntary movements that they  
268 may not be able to control as seen in p8 submission suggests that their care become more  
269 complicated without any support or physical aides.

1  
2  
3 270 *At times when you are going to wear him his clothes, you will struggle with him. He*  
4 271 *won't relax his hands; he will just stiffen them and make himself hard. You will be*  
5 272 *struggling, and he will continue to make his hands like that. . . . Am fed-up 'koraa.'* (p8,  
6 273 *caregiver of 4year old boy)*

#### 9 274 **Inadequate support from social networks:**

10 275 Besides the challenges involve in the care, caregivers also indicated that they received very  
11 276 minimal or no support from family members and others in providing care for their child. Most  
12 277 caregivers expressed concerns that their children may be abandoned in the absence of the  
13 278 primary caregiver.

17 279 *It is not easy to get someone to provide care for him especially when I am not feeling*  
18 280 *so well, I have to still manage and care for him because, the way he is, who will have*  
19 281 *time to take care of him?* (p3, caregiver of a 4year, 9months boy).

22 282 As shown in the demographics, majority of the caregivers were females and mothers to the  
23 283 children. Although, the caregiving role is traditionally a woman's role, and thus consistent with  
24 284 the findings of this study, considering the additional needs of the child with CP and also the  
25 285 emerging trend that women have more roles than the caregiving, it would be expected the  
26 286 caregivers received care, at least from the spouses. However, the statement from p3 captures  
27 287 those experiences of most of the caregivers in terms of support from their spouses.

33 288 *With this one that my husband is not helping me take care of him, do you think I will*  
34 289 *try to give birth again? He doesn't mind us any longer, at least once a while he should*  
35 290 *also pick him, and I will also rest but he doesn't.* (p3, caregiver of a 4year, 9months  
36 291 *boy)*

#### 38 292 **Economic challenges**

39 293 The cost of care globally is a challenging issue as it requires constant flow of money. The  
40 294 special needs of children with disability such as CP increases the financial burden both in the  
41 295 amount required for the care, as well as the loss of hours for family to work and gain their  
42 296 normal income. The caregivers in this study demonstrated in the submission that the sources  
43 297 of income were interrupted, and they had financial limitations in meeting all the care needs of  
44 298 the child.

#### 51 299 **Financial limitations:**

52 300 Having a child with CP means having an expenditure line that is not consistent with routine  
53 301 households' expenses, and thus raising cost of family budget. Most caregivers employed and  
54 302 unemployed described their experience of having increased expenditures due to buying of  
55 303 medications, assistive devices, transportation costs, laboratory investigations, and buying of  
56 304 foods. The latter definitely placed an extra financial burden of caregivers who may not also

1  
2  
3 305 receive financial support as there are no clear, steady formal support for the vulnerable in  
4  
5 306 Ghana, and as indicated earlier the relationships of the caregiver and the child are not  
6  
7 307 supportive enough to consider providing the caregiver with monetary support for caregiving.  
8  
9 308 See the submission of p6 and p10.

10  
11 309 *...I am supposed to be coming for review once every week, but because of the cost of*  
12 310 *transportation, I have made it once every two weeks (p6 caregiver of a 2year boy).*

13  
14 311 *This place (referring to physio unit) I was told that health insurance will cover some*  
15 312 *part and you will also pay the rest after ... sometimes. 'Hmmm' .... Is not easy . . . I*  
16 313 *have even stopped the neurological consult because you have to pay for the consultation*  
17 314 *and still buy the drugs because the hospital is not always having them (p10, caregiver*  
18 315 *of a 4year boy).*

19  
20  
21 316 **Interrupted personal income:**

22 317 Besides the increased expenditure, the economic situation of caregivers was reportedly made  
23  
24 318 worst when they could no longer engage in income earning activities. Participants reports show  
25  
26 319 that caregiving demands of their child led to them abandoning their employments as the could  
27  
28 320 not combine the care of the child which is a full-time job with their income generating activities  
29  
30 321 as shown in the quotes from participants, p10 and p3.

31 322 *I am no longer employed, cannot do any work again. I was working in a private hospital*  
32 323 *before I gave birth, but now this child is like this, I have stopped my employment*  
33 324 *because he has this problem (cerebral palsy) (p10, caregiver of a 4year boy).*

34  
35 325 *I am no longer in business because I can't be holding him while preparing my local*  
36 326 *drinks and there is no one to help. Where will I be getting money for his care? (p3,*  
37 327 *caregiver of a 4year, 9months boy).*

38  
39  
40 328 Many of the caregivers who were initially engaged in personal businesses for income had their  
41  
42 329 businesses collapsed because they did not have time to continue trading. Other caregivers  
43  
44 330 simply stopped because of the level of stress in juggling between childcare and business.  
45  
46 331 Caregivers were then left to deal with the effects of these income cuts and rising expenditures.

## 47 48 49 332 **Discussion**

50 333 Care for children with special needs such as CP is challenging in even advanced jurisdictions  
51  
52 334 with better societal literacy and technologically derived assistive devices for care (24–26). Our  
53  
54 335 findings show that caregivers encounter sociocultural, physical, and economic challenges  
55  
56 336 associated with the care of their child with CP. This study findings resonate with existing  
57  
58 337 evidence and signpost key contextual and global issues that need consideration to develop  
59  
60 338 support systems and relevant interventions. Our finding indicates that caregivers of children

1  
2  
3 339 with CP face physical care burden. Due to the muscle spasticity, weakness and uncoordinated  
4 340 motor control, children with CP rely mainly on their caregivers for physical care irrespective  
5 341 of their age (27). Indeed, motor dysfunction may become worst due to weight as children with  
6 342 CP grow (28). Although there are assistive devices for aiding in the care of sick individuals  
7 343 with neuromuscular inadequacies and selfcare deficit (29), the caregivers in this study had to  
8 344 lift and move their children manually without such devices, resulting in caregivers altered  
9 345 wellbeing such as aches and pains sometimes requiring medical attention. Meanwhile, the  
10 346 wellbeing of caregivers is critical considering that most children with CP depend solely on  
11 347 them for their care (30,31). It might therefore be useful to not only solicit the support of the  
12 348 social networks to assist primary caregivers, but it might be more sustainable for health  
13 349 professionals to assist caregivers to learn manual handling and body mechanics to empower  
14 350 them to lift and move children with minimal impact on the health of caregivers (32,33).

15 351 Cerebral palsy is an old age neurological condition with scientifically generated evidence on  
16 352 its course. Despite this, the relations of children with CP and caregivers misunderstand CP in  
17 353 many contexts especially in settings with limited general literacy(34), leading to attribution of  
18 354 the condition to supernatural causes, such as punishment from the gods and witchcraft as  
19 355 reported in this study and others (34,35). The setting of the study as shown in the demographics  
20 356 has majority of the people being superstitions about health and other societal issues as played  
21 357 out in the reports of caregivers, that their children with CP were allegedly perceived as being  
22 358 spirit children and being punished by the gods. The perceptions were translated into the level  
23 359 of engagement members of the community had with the caregivers and the children. Existing  
24 360 evidence show that beliefs of witchcraft and punishment by the gods lead to labelling,  
25 361 stigmatisation and discrimination against families and children with CP (35). Lack of support  
26 362 for caregivers resulting from stigma has been reported in the existing literature (9,14). This  
27 363 limited support could compound the innate challenges associated with having a child requiring  
28 364 special needs. Thus, society's understanding of CP is critical in reducing stigmatisation and  
29 365 discrimination against families with children with CP, and the associated cyclical effect on the  
30 366 child and caregivers. It is therefore critical that health information on CP is intensified to ensure  
31 367 that communities understand the causes and course of CP, therefore promoting empathy and  
32 368 involvement of support systems in providing care for the child to improve their life quality.

33 369 In Ghana, the health service and other interested groups such as faith-based institutions and  
34 370 churches are critical in providing service users and communities with health information.  
35 371 However, the findings of the study suggests that even primary caregivers of children with CP

1  
2  
3 372 receive limited information about the condition. Limited information on health issues and  
4  
5 373 services is a global challenge (36–38) However, challenging settings such as Ghana with  
6  
7 374 limited economic independence are worst in this regard (13,39–43). Anecdotal evidence from  
8  
9 375 the study setting suggests that health professionals provide ad hoc health education to  
10  
11 376 caregivers of children with CP and other disabilities, using medical terms that caregivers and  
12  
13 377 their support systems may not understand. Yet, there is evidence that adequate caregiver's  
14  
15 378 knowledge may promote better care for children with CP (41,44) and provision of health  
16  
17 379 information to health services users is expected to be acknowledged as a right (45–47). Indeed,  
18  
19 380 the trend to breaching the gap in service users understanding of health issues and thus  
20  
21 381 contribute effectively to services provision is through deliberate efforts of ensuring public  
22  
23 382 participation (48). Therefore, to forestall the challenges community's encounter with their  
24  
25 383 health management, conscious efforts must be made to utilize evidence such as that identified  
26  
27 384 in this study and introduce appropriate interventions at every level of the health service.

28  
29 385 Existing evidence suggests that children with CP without cognitive impairment could benefit  
30  
31 386 from formal education (49), and caregivers reported that one of their challenges was finding  
32  
33 387 school placement for their children with CP. Besides providing children with CP to explore  
34  
35 388 their potential and contribute to their development, formal school systems health programmes  
36  
37 389 have been a strategy health professionals use to deliver information on health issues to children,  
38  
39 390 and could be a means for delivering health information to children with CP. Nevertheless,  
40  
41 391 accessibility to educational infrastructure was a challenge for caregivers. Although Ghana has  
42  
43 392 an all-inclusive education policy (50), it thus appear most schools in this setting do not have  
44  
45 393 the capacity in terms of human resource and space to admit children with CP. Lack of formal  
46  
47 394 education opportunities have also been reported by parents in studies conducted in India and  
48  
49 395 Kenya where parents lamented their inability to find appropriate schools for their children with  
50  
51 396 disability (40,51,52). Besides contributing to health care and the child's growth and  
52  
53 397 development, formal education reduces the time children have to spend with their caregivers.  
54  
55 398 This provide caregivers the opportunity to engage in income generating activities that could  
56  
57 399 lessen the financial burden of having a child with cerebral palsy (40,53,54). Ghana's National  
58  
59 400 Health Insurance Scheme, meant to lessen the burden of health care cost on service users  
60  
401 currently operates a cost sharing system and patients must do out-of-pocket payment to obtain  
402  
403 some critical services (55). The latter indicates that the health financial burden on caregivers  
404  
405 in this study's setting could be more than communicated by the caregivers. Even though the  
406  
407 economic challenges for caregivers in this study are unavoidable considering that the setting is



generally a deprived area, the absence or limited financial support could limit caregivers ability to access all necessities such as rehabilitation services for the care of their child as reported in other studies (53).

Conclusively, contextual issues that relates to child physical care, cultural perceptions, health information needs, and education create problems for caregivers, and need to be translated into appropriate community and health system response. Findings suggest that caregivers have a candid idea on challenges they face on daily basis, and they should be appropriately involved in designing appropriate innovative services or health care interventions.

**Funding statement:** This research received no specific grant from any funding agency in the public, commercial or not-for-profit sectors.

**Competing interests' statement:** No competing interests to declare.

**Author contribution:** MMM and YNA and MWK conceptualize the study, methodology and literature review. MMM and JNS undertook the data collection, transcription, and analysis. YNA reviewed transcript compared with audios, JNS and MWK drafted the manuscript. MWK and MMM reviewed manuscript for intellectual content. All authors read and approved the final manuscript for publication.

**Data Availability:** All data relevant to the study are included in the article

#### **What is already known on this topic**

- Having a child with cerebral palsy negatively impact the physical and psychological health of the caregiver at home
- Children with cerebral palsy may have functional limitations and be dependent on others for assistance with activities daily living.
- Coping and providing daily care required by a child with cerebral palsy may be the greatest challenge of caregivers at home.

#### **What this study adds:**

- There is a cultural and intuitive belief about cerebral palsy that create social isolation and stigma against caregivers and their children with the condition
- Provision of health information on cerebral palsy is limited, and caregivers remain doubtful of the cause and course of the condition

- 1  
2  
3 434 • Caring for a child with cerebral palsy leads to high health care related cost and loss of  
4  
5 435 businesses and jobs that worsens the financial situation of caregivers.  
6  
7 436 • Accessibility to formal education for children with cerebral palsy is limited.  
8

9 437 **How this study might affect research, practice or policy:**

- 10  
11 438 • It is a critical moment for health service and interested parties to intensify health  
12  
13 439 information on cerebral palsy to ensure that communities understand its causes and  
14  
15 440 course.  
16  
17 441 • Pragmatic steps and policy initiatives that offset the cost of accessing health care  
18  
19 442 services for children with cerebral palsy could be beneficial in this context.  
20  
21 443 • The already existing “all-inclusive educational policy” should be operationalised by the  
22  
23 444 relevant authorities to make formal education accessible to children with cerebral palsy.  
24  
25 445 • The findings of this study should serve as foundational research for empirical studies  
26  
27 446 that seeks to develop interventions for caregivers of children with CP.  
28  
29 447 • Caregivers of children with cerebral palsy could benefit from training on manual  
30  
31 448 handling and body mechanics to empower them to lift and move children with minimal  
32  
33 449 impact on their health.

34 450 **Patient and Public Involvement**

35  
36 451 Patients or the public were not involved in the design, or conduct, or reporting, or dissemination  
37  
38 452 plans of our research  
39

40 453

41  
42 454 **References**

- 43  
44  
45 455 1. Sellier E, Platt MJ, Andersen GL, Krägeloh-Mann I, De La Cruz J, Cans C, et al.  
46  
47 456 Decreasing prevalence in cerebral palsy: a multi-site European population-based study,  
48  
49 457 1980 to 2003. *Dev Med Child Neurol* [Internet]. 2016 Jan 1 [cited 2022 Nov  
50  
51 458 16];58(1):85–92. Available from:  
52  
53 459 <https://onlinelibrary.wiley.com/doi/full/10.1111/dmcn.12865>  
54  
55 460 2. McIntyre S, Taitz D, Keogh J, Goldsmith S, Badawi N, Blair E. A systematic review  
56  
57 461 of risk factors for cerebral palsy in children born at term in developed countries. *Dev*  
58  
59 462 *Med Child Neurol* [Internet]. 2013 Jun 1 [cited 2022 Nov 16];55(6):499–508.  
60  
463 Available from: <https://onlinelibrary.wiley.com/doi/full/10.1111/dmcn.12017>

- 1  
2  
3 464 3. Oskoui M, Coutinho F, Dykeman J, Jetté N, Pringsheim T. An update on the  
4  
5 465 prevalence of cerebral palsy: a systematic review and meta-analysis. *Dev Med Child*  
6  
7 466 *Neurol* [Internet]. 2013 Jun [cited 2022 Nov 16];55(6):509–19. Available from:  
8  
9 467 <https://pubmed.ncbi.nlm.nih.gov/23346889/>
- 10  
11 468 4. Chounti A, Hägglund G, Wagner P, Westbom L. Sex differences in cerebral palsy  
12  
13 469 incidence and functional ability: a total population study. *Acta Paediatr* [Internet].  
14  
15 470 2013 [cited 2022 Nov 16];102(7):712–7. Available from:  
16  
17 471 <https://pubmed.ncbi.nlm.nih.gov/23551760/>
- 18  
19 472 5. Dan B, Paneth N. Making sense of cerebral palsy prevalence in low-income countries.  
20  
21 473 *Lancet Glob Heal* [Internet]. 2017 Dec 1 [cited 2022 Nov 16];5(12):e1174–5.  
22  
23 474 Available from: <http://www.thelancet.com/article/S2214109X17304205/fulltext>
- 24  
25 475 6. Van Naarden Braun K, Doernberg N, Schieve L, Christensen D, Goodman A, Yeargin-  
26  
27 476 Allsopp M. Birth Prevalence of Cerebral Palsy: A Population-Based Study. *Pediatrics*  
28  
29 477 [Internet]. 2016 Jan 1 [cited 2022 Oct 27];137(1). Available from:  
30  
31 478 <https://pubmed.ncbi.nlm.nih.gov/26659459/>
- 32  
33 479 7. Kyeremateng JDA, Edusei A, Dogbe JA, Opoku MP, Nketsia W, Hammond C, et al.  
34  
35 480 Experiences of primary caregivers of children with cerebral palsy across the trajectory  
36  
37 481 of diagnoses in Ghana. *African J Disabil*. 2019;8.
- 38  
39 482 8. Raina P, O'Donnell M, Rosenbaum P, Brehaut J, Walter SD, Russell D, et al. The  
40  
41 483 health and well-being of caregivers of children with cerebral palsy. *Pediatrics*  
42  
43 484 [Internet]. 2005 Jun [cited 2022 Oct 4];115(6). Available from:  
44  
45 485 <https://pubmed.ncbi.nlm.nih.gov/15930188/>
- 46  
47 486 9. Majnemer A, Shevell M, Law M, Poulin C, Rosenbaum P. Indicators of distress in  
48  
49 487 families of children with cerebral palsy. *Disabil Rehabil* [Internet]. 2012 [cited 2022  
50  
51 488 Nov 16];34(14):1202–7. Available from: <https://pubmed.ncbi.nlm.nih.gov/22235883/>
- 52  
53 489 10. Galpin J, Barratt P, Ashcroft E, Greathead S, Kenny L, Pellicano E. “The dots just  
54  
55 490 don’t join up”: Understanding the support needs of families of children on the autism  
56  
57 491 spectrum. *Autism* [Internet]. 2018 Jul 1 [cited 2022 Nov 16];22(5):571–84. Available  
58  
59 492 from: <https://pubmed.ncbi.nlm.nih.gov/28449587/>
- 60  
493 11. Rajan AM, John R. Resilience and impact of children’s intellectual disability on Indian

- 1  
2  
3 494 parents. <https://doi.org/10.1177/1744629516654588> [Internet]. 2017 Feb 7 [cited 2022  
4 Nov 16];21(4):315–24. Available from:  
5  
6 495  
7 496 [https://journals.sagepub.com/doi/10.1177/1744629516654588?url\\_ver=Z39.88-  
8 497 2003&rfr\\_id=ori%3Arid%3Acrossref.org&rfr\\_dat=cr\\_pub++0pubmed](https://journals.sagepub.com/doi/10.1177/1744629516654588?url_ver=Z39.88-2003&rfr_id=ori%3Arid%3Acrossref.org&rfr_dat=cr_pub++0pubmed)
- 10  
11 498 12. Romley JA, Shah AK, Chung PJ, Elliott MN, Vestal KD, Schuster MA. Family-  
12 499 Provided Health Care for Children With Special Health Care Needs. *Pediatrics*  
13 500 [Internet]. 2017 Jan 1 [cited 2022 Nov 16];139(1):e20161287–e20161287. Available  
14 501 from: <https://europepmc.org/article/med/28028202>
- 17  
18 502 13. Resch JA, Mireles G, Benz MR, Grenwelge C, Peterson R, Zhang D. Giving parents a  
19 503 voice: A qualitative study of the challenges experienced by parents of children with  
20 504 disabilities. *Rehabil Psychol* [Internet]. 2010 May [cited 2022 Nov 16];55(2):139–50.  
21 505 Available from: /record/2010-09922-004
- 24  
25 506 14. Dambi JM, Jelsma J, Mlambo T. Caring for a child with Cerebral Palsy: The  
26 507 experience of Zimbabwean mothers. *African J Disabil* [Internet]. 2015 Aug 13 [cited  
27 508 2022 Nov 16];4(1). Available from: /pmc/articles/PMC5433478/
- 30  
31 509 15. Hamzat THK, Mordi EL. Impact of caring for children with cerebral palsy on the  
32 510 general health of their caregivers in an African community. *Int J Rehabil Res*  
33 511 [Internet]. 2007 Sep [cited 2022 Oct 4];30(3):191–4. Available from:  
34 512 <https://pubmed.ncbi.nlm.nih.gov/17762763/>
- 37  
38 513 16. Creswell JW, Poth CN. *Qualitative Inquiry & Research Design + 30 Essential Skills*  
39 514 *for the Qualitative Researcher*. sage [Internet]. 2017 [cited 2022 Oct 27];459.  
40 515 Available from: <https://market.android.com/details?id=book-yMEKMQAACAAJ>
- 43  
44 516 17. Tong A, Sainsbury P, Craig J. Consolidated criteria for reporting qualitative research  
45 517 (COREQ): a 32-item checklist for interviews and focus groups. *Int J Qual Res*  
46 518 [Internet]. 2007 [cited 2022 Oct 4];19(6):349–57. Available from:  
47 519 <https://academic.oup.com/intqhc/article-abstract/19/6/349/1791966>
- 50  
51 520 18. Youth Home Cultural group. Northern Ghana, Tamale and Dagbani culture - Youth  
52 521 Home Cultural Group [Internet]. [cited 2022 Nov 16]. Available from:  
53 522 [https://www.yhcg.net/tamale-cultural-tours/northern-ghana-tamale-and-dagbani-  
54 523 culture.aspx](https://www.yhcg.net/tamale-cultural-tours/northern-ghana-tamale-and-dagbani-culture.aspx)

- 1  
2  
3 524 19. Ghana Statistical Service. 2010 population & housing census : summary report of final  
4 results. Accra: Ghana Statistical Service; 2012.  
5 525  
6  
7 526 20. Dworkin SL. Sample Size Policy for Qualitative Studies Using In-Depth Interviews.  
8 Arch Sex Behav 2012 416 [Internet]. 2012 Sep 12 [cited 2022 Nov 16];41(6):1319–20.  
9 527 Available from: <https://link.springer.com/article/10.1007/s10508-012-0016-6>  
10 528  
11  
12  
13 529 21. Mason M. Sample Size and Saturation in PhD Studies Using Qualitative Interviews.  
14 Forum Qual Sozialforsch [Internet]. 2010 [cited 2022 Nov 16];11(3). Available from:  
15 530 [https://www.researchgate.net/publication/47408617\\_Sample\\_Size\\_and\\_Saturation\\_in\\_](https://www.researchgate.net/publication/47408617_Sample_Size_and_Saturation_in_PhD_Studies_Using_Qualitative_Interviews)  
16 531 [PhD\\_Studies\\_Using\\_Qualitative\\_Interviews](https://www.researchgate.net/publication/47408617_Sample_Size_and_Saturation_in_PhD_Studies_Using_Qualitative_Interviews)  
17 532  
18  
19  
20  
21 533 22. Fossey E, Harvey C, McDermott F, Davidson L. Understanding and evaluating  
22 534 qualitative research. Aust N Z J Psychiatry [Internet]. 2002 Dec [cited 2022 Oct  
23 535 4];36(6):717–32. Available from: <https://pubmed.ncbi.nlm.nih.gov/12406114/>  
24  
25  
26 536 23. Elo S, Kyngäs H. The qualitative content analysis process. J Adv Nurs [Internet]. 2008  
27 537 Apr 1 [cited 2022 Oct 27];62(1):107–15. Available from:  
28 538 <https://onlinelibrary.wiley.com/doi/full/10.1111/j.1365-2648.2007.04569.x>  
29  
30  
31  
32 539 24. Borst J. Caregivers of seriously disabled children and their relationship issues on the  
33 540 labor market. Popul Res Policy Rev [Internet]. 2010 [cited 2022 Nov 29];24:467–88.  
34 541 Available from: [http://humanexchange.hu/site/uploads/file/114-129\\_jb.pdf](http://humanexchange.hu/site/uploads/file/114-129_jb.pdf)  
35  
36  
37  
38 542 25. Ni ZH, Ding S, Wu JH, Zhang S, Liu CY. Family Caregivers' Experiences of Caring  
39 543 for Children With Cerebral Palsy in China: A Qualitative Descriptive Study.  
40 544 <https://doi.org/10.1177/00469580221121510> [Internet]. 2022 Sep 5 [cited 2022 Nov  
41 545 29];59:1–7. Available from:  
42 546 <https://journals.sagepub.com/doi/full/10.1177/00469580221121510>  
43  
44  
45  
46  
47 547 26. Sajedi F, Alizad V, Malekkhosravi G, Karimlou M, Vameghi R. Depression in  
48 548 Mothers of Children with Cerebral Palsy and Its Relation to Severity and Type of  
49 549 Cerebral Palsy. Acta Med Iran [Internet]. 2010 [cited 2022 Nov 29];48(4):250–4.  
50 550 Available from: <https://acta.tums.ac.ir/index.php/acta/article/view/4041>  
51  
52  
53  
54  
55 551 27. Elangkovan IT, Shorey S. Experiences and Needs of Parents Caring for Children with  
56 552 Cerebral Palsy: A Systematic Review. J Dev Behav Pediatr [Internet]. 2020 Dec 1  
57 553 [cited 2022 Nov 28];41(9):730–9. Available from:

- 1  
2  
3 554 <https://pubmed.ncbi.nlm.nih.gov/33136702/>  
4  
5  
6 555 28. Rutz E, Thomason P. Natural history of cerebral palsy and outcome assessment.  
7 556 *Handb Hum Motion* [Internet]. 2018 Apr 4 [cited 2022 Nov 28];2–3:1053–73.  
8 Available from: [https://link.springer.com/referenceworkentry/10.1007/978-3-319-](https://link.springer.com/referenceworkentry/10.1007/978-3-319-14418-4_49)  
9 557 [14418-4\\_49](https://link.springer.com/referenceworkentry/10.1007/978-3-319-14418-4_49)  
10 558  
11  
12  
13 559 29. Patel DR, Neelakantan M, Pandher K, Merrick J. Cerebral palsy in children: a clinical  
14 overview. *Transl Pediatr* [Internet]. 2020 [cited 2022 Nov 28];9(Suppl 1):S125–35.  
15 560 Available from: <https://pubmed.ncbi.nlm.nih.gov/32206590/>  
16 561  
17  
18  
19 562 30. Gokcin Eminel A, Kahraman T, Genc A. Physical workload during caregiving  
20 activities and related factors among the caregivers of children with cerebral palsy. *Ir J*  
21 563 *Med Sci* [Internet]. 2021 May 1 [cited 2022 Nov 28];190(2):701–9. Available from:  
22 564 <https://pubmed.ncbi.nlm.nih.gov/32789552/>  
23 565  
24  
25  
26 566 31. Grigger K. Cerebral palsy: an overview. . *Am Fam Physician* [Internet]. 2006 [cited  
27 567 2022 Nov 28];73:91–100. Available from:  
28 568 [https://www.google.com/search?q=KRIGGER%2C+K.+W.+2006.+Cerebral+palsy%3](https://www.google.com/search?q=KRIGGER%2C+K.+W.+2006.+Cerebral+palsy%3A+an+overview.+American+family+physician%2C+73%2C+91-100.&oq=KRIGGER%2C+K.+W.+2006.+Cerebral+palsy%3A+an+overview.+American+family+physician%2C+73%2C+91-100.&aqs=chrome..69i57.1052j0j7&sourceid=chrome&ie=UTF-8)  
29 569 [A+an+overview.+American+family+physician%2C+73%2C+91-](https://www.google.com/search?q=KRIGGER%2C+K.+W.+2006.+Cerebral+palsy%3A+an+overview.+American+family+physician%2C+73%2C+91-100.&oq=KRIGGER%2C+K.+W.+2006.+Cerebral+palsy%3A+an+overview.+American+family+physician%2C+73%2C+91-100.&aqs=chrome..69i57.1052j0j7&sourceid=chrome&ie=UTF-8)  
30 570 [100.&oq=KRIGGER%2C+K.+W.+2006.+Cerebral+palsy%3A+an+overview.+Ameri](https://www.google.com/search?q=KRIGGER%2C+K.+W.+2006.+Cerebral+palsy%3A+an+overview.+American+family+physician%2C+73%2C+91-100.&oq=KRIGGER%2C+K.+W.+2006.+Cerebral+palsy%3A+an+overview.+American+family+physician%2C+73%2C+91-100.&aqs=chrome..69i57.1052j0j7&sourceid=chrome&ie=UTF-8)  
31 571 [can+family+physician%2C+73%2C+91-](https://www.google.com/search?q=KRIGGER%2C+K.+W.+2006.+Cerebral+palsy%3A+an+overview.+American+family+physician%2C+73%2C+91-100.&oq=KRIGGER%2C+K.+W.+2006.+Cerebral+palsy%3A+an+overview.+American+family+physician%2C+73%2C+91-100.&aqs=chrome..69i57.1052j0j7&sourceid=chrome&ie=UTF-8)  
32 572 [100.&aqs=chrome..69i57.1052j0j7&sourceid=chrome&ie=UTF-8](https://www.google.com/search?q=KRIGGER%2C+K.+W.+2006.+Cerebral+palsy%3A+an+overview.+American+family+physician%2C+73%2C+91-100.&oq=KRIGGER%2C+K.+W.+2006.+Cerebral+palsy%3A+an+overview.+American+family+physician%2C+73%2C+91-100.&aqs=chrome..69i57.1052j0j7&sourceid=chrome&ie=UTF-8)  
33 573  
34 574  
35 575  
36 576  
37 577  
38 578  
39 579  
40 580  
41 581  
42 582  
43 583  
44 584  
45 585  
46 586  
47 587  
48 588  
49 589  
50 590  
51 591  
52 592  
53 593  
54 594  
55 595  
56 596  
57 597  
58 598  
59 599  
60 600

- 1  
2  
3 585 baffoe/  
4  
5  
6 586 35. Opoku MP, Peprah Opoku M, Alupo BA, Gyamfi N, Odame L, Mprah WK, et al. The  
7 587 Family and Disability in Ghana: Highlighting Gaps in Achieving Social Inclusion.  
8 588 Disabil CBR Incl Dev [Internet]. 2018 Mar 16 [cited 2022 Nov 16];28(4):41.  
9 589 Available from: <http://dcidj.org/articles/10.5463/dcid.v28i4.666/>  
10  
11  
12  
13 590 36. Clarke MA, Moore JL, Steege LM, Koopman RJ, Belden JL, Canfield SM, et al.  
14 591 Health information needs, sources, and barriers of primary care patients to achieve  
15 592 patient-centered care: A literature review. Health Informatics J [Internet]. 2016 Dec 1  
16 593 [cited 2022 Nov 29];22(4):992–1016. Available from:  
17 594 [https://journals.sagepub.com/doi/10.1177/1460458215602939?url\\_ver=Z39.88-](https://journals.sagepub.com/doi/10.1177/1460458215602939?url_ver=Z39.88-2003&rfr_id=ori%3Arid%3Acrossref.org&rfr_dat=cr_pub++0pubmed)  
18 595 [2003&rfr\\_id=ori%3Arid%3Acrossref.org&rfr\\_dat=cr\\_pub++0pubmed](https://journals.sagepub.com/doi/10.1177/1460458215602939?url_ver=Z39.88-2003&rfr_id=ori%3Arid%3Acrossref.org&rfr_dat=cr_pub++0pubmed)  
19  
20  
21  
22  
23  
24 596 37. Budtz S, Witt K. Consulting the Internet before visit to general practice. Patients' use  
25 597 of the Internet and other sources of health information. Scand J Prim Health Care  
26 598 [Internet]. 2002 Sep [cited 2022 Nov 29];20(3):174–6. Available from:  
27 599 <https://pubmed.ncbi.nlm.nih.gov/12389756/>  
30  
31  
32 600 38. Avery JC, Braunack-Mayer AJ. The information needs of women diagnosed with  
33 601 Polycystic Ovarian Syndrome--implications for treatment and health outcomes. BMC  
34 602 Womens Health [Internet]. 2007 Jun 20 [cited 2022 Nov 29];7. Available from:  
35 603 <https://pubmed.ncbi.nlm.nih.gov/17578583/>  
36  
37  
38  
39 604 39. Atakro CA, Atakro A, Aboagye JS, Blay AA, Addo SB, Agyare DF, et al. Older  
40 605 people's challenges and expectations of healthcare in Ghana: A qualitative study.  
41 606 PLoS One [Internet]. 2021 Jan 1 [cited 2022 Nov 16];16(1):e0245451. Available from:  
42 607 <https://journals.plos.org/plosone/article?id=10.1371/journal.pone.0245451>  
43  
44  
45  
46  
47 608 40. Vadivelan K, Sekar P, Sruthi SS, Gopichandran V. Burden of caregivers of children  
48 609 with cerebral palsy: An intersectional analysis of gender, poverty, stigma, and public  
49 610 policy. BMC Public Health [Internet]. 2020 May 8 [cited 2022 Nov 16];20(1):1–8.  
50 611 Available from: [https://bmcpublichealth.biomedcentral.com/articles/10.1186/s12889-](https://bmcpublichealth.biomedcentral.com/articles/10.1186/s12889-020-08808-0)  
51 612 [020-08808-0](https://bmcpublichealth.biomedcentral.com/articles/10.1186/s12889-020-08808-0)  
52  
53  
54  
55  
56 613 41. Zuurmond M, Nyante G, Baltussen M, Seeley J, Abanga J, Shakespeare T, et al. A  
57 614 support programme for caregivers of children with disabilities in Ghana:  
58 615 Understanding the impact on the wellbeing of caregivers. Child Care Health Dev

- 1  
2  
3 616 [Internet]. 2019 Jan 1 [cited 2022 Nov 16];45(1):45–53. Available from:  
4  
5 617 <https://pubmed.ncbi.nlm.nih.gov/30259548/>  
6  
7 618 42. Singogo C, Mweshi M, Rhoda A. Challenges experienced by mothers caring for  
8 children with cerebral palsy in Zambia. *South African J Physiother* [Internet]. 2015  
9 619 Apr 28 [cited 2022 Nov 16];71(1). Available from: </pmc/articles/PMC6093109/>  
10 620  
11  
12 621 43. Priyadharishini J, Sadan V, Prashanth, Sebastian T. Community - Based intervention  
13 package on knowledge, attitude and selected skills of home care among primary care  
14 622 givers of children with cerebral palsy. *Indian J Contin Nurs Educ* [Internet]. 2017  
15 623 [cited 2022 Nov 16];18(2):46. Available from:  
16 624 [https://www.ijcne.org/article.asp?issn=2230-](https://www.ijcne.org/article.asp?issn=2230-7354;year=2017;volume=18;issue=2;spage=46;epage=50;aulast=Priyadharishini)  
17 625 [7354;year=2017;volume=18;issue=2;spage=46;epage=50;aulast=Priyadharishini](https://www.ijcne.org/article.asp?issn=2230-7354;year=2017;volume=18;issue=2;spage=46;epage=50;aulast=Priyadharishini)  
18 626  
19  
20 627 44. Adams MS, Khan NZ, Begum SA, Wirz SL, Hesketh T, Pring TR. Feeding difficulties  
21 in children with cerebral palsy: low-cost caregiver training in Dhaka, Bangladesh.  
22 628 *Child Care Health Dev* [Internet]. 2012 Nov [cited 2022 Nov 16];38(6):878–88.  
23 629 Available from: <https://pubmed.ncbi.nlm.nih.gov/22082112/>  
24 630  
25  
26 631 45. NHS Scotland. The Charter of Patients Rights and Responsibilities | NHS inform  
27 [Internet]. 2022 [cited 2022 Nov 29]. Available from:  
28 632 [https://www.nhsinform.scot/care-support-and-rights/health-rights/patient-charter/the-](https://www.nhsinform.scot/care-support-and-rights/health-rights/patient-charter/the-charter-of-patient-rights-and-responsibilities)  
29 633 [charter-of-patient-rights-and-responsibilities](https://www.nhsinform.scot/care-support-and-rights/health-rights/patient-charter/the-charter-of-patient-rights-and-responsibilities)  
30 634  
31  
32 635 46. Norman ID, Kweku M, Awiah BM, Binka FN, Norman ID, Kweku M, et al. Patients’  
33 Access to Medical Records: Is It a Privilege or a Substantive Right? *Adv Appl Sociol*  
34 636 [Internet]. 2015 Dec 4 [cited 2022 Nov 29];5(12):291–8. Available from:  
35 637 [http://www.scirp.org/Html/1-2290290\\_61714.htm](http://www.scirp.org/Html/1-2290290_61714.htm)  
36 638  
37  
38 639 47. Yarney L, Buabeng T, Baidoo D, Bawole JN. Operationalization of the Ghanaian  
39 Patients’ Charter in a Peri-urban Public Hospital: Voices of Healthcare Workers and  
40 640 Patients. *Int J Heal Policy Manag* [Internet]. 2016 [cited 2022 Nov 29];5(9):525.  
41 641 Available from: </pmc/articles/PMC5010655/>  
42 642  
43  
44 643 48. Florin D, Dixon J. Public involvement in health care. *BMJ Br Med J* [Internet]. 2004  
45 644 Jan 1 [cited 2022 Nov 29];328(7432):159. Available from: </pmc/articles/PMC314519/>  
46 645  
47  
48 645 49. Gillies MB, Bowen JR, Patterson JA, Roberts CL, Torvaldsen S. Educational  
49  
50  
51  
52  
53  
54  
55  
56  
57  
58  
59  
60



- 1  
2  
3 646 outcomes for children with cerebral palsy: a linked data cohort study. *Dev Med Child*  
4 647 *Neurol* [Internet]. 2018 Apr 1 [cited 2022 Nov 29];60(4):397–401. Available from:  
5 648 <https://pubmed.ncbi.nlm.nih.gov/29278268/>
- 6  
7  
8  
9 649 50. Ministry of Education. Inclusive Education Policy | UNICEF Ghana [Internet]. 2015  
10 650 [cited 2022 Nov 29]. Available from: [https://www.unicef.org/ghana/reports/inclusive-](https://www.unicef.org/ghana/reports/inclusive-education-policy)  
11 651 [education-policy](https://www.unicef.org/ghana/reports/inclusive-education-policy)
- 12  
13  
14  
15 652 51. Geere JL, Gona J, Omondi FO, Kifalu MK, Newton CR, Hartley S. Caring for children  
16 653 with physical disability in Kenya: potential links between caregiving and carers'  
17 654 physical health. *Child* [Internet]. 2013 May [cited 2022 Nov 16];39(3):381. Available  
18 655 from: [/pmc/articles/PMC3654176/](https://pubmed.ncbi.nlm.nih.gov/24711766/)
- 19  
20  
21  
22 656 52. Vanderpuye I. Piloting inclusive education in Ghana: parental perceptions,  
23 657 expectations and involvement. PhD thesis, University of Leeds. [Leeds]: University of  
24 658 Leeds; 2013.
- 25  
26  
27  
28 659 53. Nuri RP, Aldersey HM, Ghahari S. Needs of families of children with cerebral palsy in  
29 660 Bangladesh: A qualitative study. *Child Care Health Dev* [Internet]. 2019 Jan 1 [cited  
30 661 2022 Nov 16];45(1):36–44. Available from:  
31 662 <https://pubmed.ncbi.nlm.nih.gov/30304759/>
- 32  
33  
34  
35 663 54. Chiluba BC, Moyo G. Caring for a cerebral palsy child: a caregivers perspective at the  
36 664 University Teaching Hospital, Zambia. *BMC Res Notes* [Internet]. 2017 Dec 8 [cited  
37 665 2022 Nov 16];10(1). Available from: <https://pubmed.ncbi.nlm.nih.gov/29221493/>
- 38  
39  
40  
41 666 55. Akweongo P, Aikins M, Wyss K, Salari P, Tediosi F. Insured clients out-of-pocket  
42 667 payments for health care under the national health insurance scheme in Ghana. *BMC*  
43 668 *Health Serv Res* [Internet]. 2021 Dec 1 [cited 2022 Nov 29];21(1):1–14. Available  
44 669 from: [https://bmchealthservres.biomedcentral.com/articles/10.1186/s12913-021-](https://bmchealthservres.biomedcentral.com/articles/10.1186/s12913-021-06401-8)  
45 670 [06401-8](https://bmchealthservres.biomedcentral.com/articles/10.1186/s12913-021-06401-8)
- 46  
47  
48  
49  
50  
51 671

# BMJ Paediatrics Open

## Family caregivers experience of care with a child with cerebral palsy: the lived experiences and challenges of caregivers in a resource-limited setting in northern Ghana

|                               |                                                                                                                                                                                                                                                                                                                                                                                                                  |
|-------------------------------|------------------------------------------------------------------------------------------------------------------------------------------------------------------------------------------------------------------------------------------------------------------------------------------------------------------------------------------------------------------------------------------------------------------|
| Journal:                      | <i>BMJ Paediatrics Open</i>                                                                                                                                                                                                                                                                                                                                                                                      |
| Manuscript ID                 | bmjpo-2022-001807.R1                                                                                                                                                                                                                                                                                                                                                                                             |
| Article Type:                 | Original research                                                                                                                                                                                                                                                                                                                                                                                                |
| Date Submitted by the Author: | 15-Mar-2023                                                                                                                                                                                                                                                                                                                                                                                                      |
| Complete List of Authors:     | Mwinbam, Mavis Mallory; Nadowli District Hospital, Upper West Region, Ghana, Department of Nursing<br>Suglo, Joseph; Presbyterian University College, Department of Nursing and Midwifery<br>Nyarko Agyeman, Yaa; University for Development Studies, Department of Population and Reproductive Health<br>Kukeba, Margaret Wekem; C K Tedam University of Technology and Applied Sciences, Department of Nursing |
| Keywords:                     | Qualitative research, Rehabilitation                                                                                                                                                                                                                                                                                                                                                                             |
|                               |                                                                                                                                                                                                                                                                                                                                                                                                                  |

SCHOLARONE™  
Manuscripts

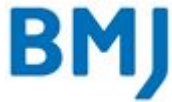

I, the Submitting Author has the right to grant and does grant on behalf of all authors of the Work (as defined in the below author licence), an exclusive licence and/or a non-exclusive licence for contributions from authors who are: i) UK Crown employees; ii) where BMJ has agreed a CC-BY licence shall apply, and/or iii) in accordance with the terms applicable for US Federal Government officers or employees acting as part of their official duties; on a worldwide, perpetual, irrevocable, royalty-free basis to BMJ Publishing Group Ltd ("BMJ") its licensees and where the relevant Journal is co-owned by BMJ to the co-owners of the Journal, to publish the Work in this journal and any other BMJ products and to exploit all rights, as set out in our [licence](#).

The Submitting Author accepts and understands that any supply made under these terms is made by BMJ to the Submitting Author unless you are acting as an employee on behalf of your employer or a postgraduate student of an affiliated institution which is paying any applicable article publishing charge ("APC") for Open Access articles. Where the Submitting Author wishes to make the Work available on an Open Access basis (and intends to pay the relevant APC), the terms of reuse of such Open Access shall be governed by a Creative Commons licence – details of these licences and which [Creative Commons](#) licence will apply to this Work are set out in our licence referred to above.

Other than as permitted in any relevant BMJ Author's Self Archiving Policies, I confirm this Work has not been accepted for publication elsewhere, is not being considered for publication elsewhere and does not duplicate material already published. I confirm all authors consent to publication of this Work and authorise the granting of this licence.

**Title:** Family caregivers experience of care with a child with cerebral palsy: the lived experiences and challenges of caregivers in a resource-limited setting in northern Ghana

**Authors:** Mavis Mallory Mwinbam<sup>1</sup>, Joseph Ngmenesegre Suglo<sup>2\*</sup>, Yaa Nyarko Agyeman<sup>3</sup>, Margaret Wekem Kukeba<sup>4</sup>

### **Institutional affiliations**

<sup>1</sup>Department of Nursing, Nadowli District Hospital, Upper West Region, Ghana

<sup>2</sup>Department of Nursing and Midwifery, Presbyterian University, Ghana.

<sup>3</sup>Department of Population and Reproductive Health, School of Public Health, University for Development Studies

<sup>4</sup>Department of Nursing, CK Tadam University of Technology and Applied Sciences

\*Correspondence: [suglojoseph@gmail.com](mailto:suglojoseph@gmail.com)

### **Credentials and occupation of Researchers**

<sup>1</sup>MPN - Paediatric Nurse Specialist; <sup>2</sup>PhD student - Lecturer; <sup>3</sup>PhD – Senior Lecturer; <sup>4</sup>PhD – Senior Lecturer

### **Abstract**

#### **Introduction**

Caring for a child with cerebral palsy could be more emotionally and physically demanding than caring for a typical growing child. The task could be more challenging in resource-limited settings with insufficient support services. Family caregivers' perspective of this phenomenon needs exploring to facilitate the development of innovative services. The study explored the challenges family caregivers face of children with cerebral palsy in a resource-limited context in northern Ghana.

#### **Methods**

A qualitative phenomenological approach was utilised. Participants were family caregivers (n = 13) of children with cerebral palsy recruited from the physiotherapy unit of Tamale teaching hospital in Ghana. Individual face-to-face, in-depth interviews using a topic guide were conducted. All interviews were audio recorded, and verbatim transcription and translation were carried out before undertaking an inductive content analysis.

#### **Results**

Caregivers describe caring for a child with cerebral palsy as a daunting task. The results show that caregivers encounter challenges that are categorised as sociocultural, consisting of the values, attitudes, and belief systems of society, sheer physical care burden and economic challenges. Most caregivers lamented that they encountered social discrimination and lack of family and societal support, as they were isolated, had poor access to health information and education, had financial constraints, and lost businesses and jobs.

**38 Conclusion**

39 Caregivers have the arduous task of caring for a child with cerebral palsy. Social support interventions  
40 and policy initiatives that seek to ameliorate caregivers' finances and make formal education accessible  
41 to this marginalised child population may be beneficial in this study context.

**42 What is already known on this topic:**

- 43 • Having a child with cerebral palsy negatively impact the physical and psychological  
44 health of the caregiver at home.
- 45 • Children with cerebral palsy may have functional limitations and depend on others for  
46 assistance with daily living activities.
- 47 • Coping and providing daily care required by a child with cerebral palsy may be the  
48 greatest challenge of caregivers at home.

**49 What this study adds:**

- 50 • There is a cultural and intuitive belief about cerebral palsy that create social isolation  
51 and stigma against caregivers and their children with the condition.
- 52 • Provision of health information on cerebral palsy is limited, and caregivers remain  
53 doubtful of the cause and course of the condition.
- 54 • Caring for a child with cerebral palsy leads to high health care related cost and loss of  
55 businesses and jobs that worsens the financial situation of caregivers.
- 56 • Accessibility to formal education for children with cerebral palsy is limited.

**57 How this study might affect research, practice, or policy:**

- 58 • Pragmatic steps and policy initiatives that offset the cost of accessing health care  
59 services for children with cerebral palsy could be beneficial in this context.
- 60 • The relevant authorities should operationalise the already existing "all-inclusive  
61 educational policy" to make formal education accessible to children with cerebral palsy.
- 62 • The findings of this study should serve as foundational research for empirical studies  
63 that seeks to develop interventions for caregivers of children with CP.

64

## 65 Introduction

66 Cerebral palsy (CP) is a major cause of childhood disability affecting function and development  
67 (1). CP, a non-progressive lifelong neurodevelopmental disorder, results from a brain injury  
68 that occurs before the completion of cerebral development in the developing foetus or infant  
69 (1). The risk factors associated with developing CP occur before, during or after pregnancy.  
70 These risk factors may include intrauterine hypoxia, the premature rupture of membranes,  
71 placenta abnormalities, preterm or post-term birth, asphyxia, prolonged labour, meconium  
72 aspiration syndrome, infections, hypoglycaemia, intracranial haemorrhage and respiratory  
73 distress syndrome (2). CP is estimated to occur in approximately 2.11 per 1000 live births  
74 globally (3), affecting males more than females (4), with a more significant number in low-  
75 income countries (LIC) (1,5,6).

76 In the Ghanaian context, official statistics on the number of children with CP are lacking.  
77 However, Cerebral Palsy Africa (CPA) estimated that one child per 300 births has CP in  
78 Ghana (7). The effects of CP on the growing child range from permanent disorders in  
79 movement and posture to activity limitation. The motor disorders of CP are frequently  
80 accompanied by impaired cognition, communication, sensation, perception, behavioural  
81 abnormalities, seizure disorders, musculoskeletal problems or a combination of these features  
82 (8,9). The condition adversely affects children's daily living experiences and limits their self-  
83 care functions such as feeding, dressing, bathing, and mobility (10,11). Because of the  
84 functional limitations experienced, some children with CP depend on others for assistance  
85 with daily activities, leading to long-term caregiving that far exceeds the usual needs of  
86 typically developing children (8,12,13). Coping and providing the high level of care required  
87 by a child with long-term functional limitations and dependence may be the greatest  
88 challenge for caregivers at home. Care provision, therefore, stands as a burdensome daunting  
89 task that impacts the caregiver's physical and psychological wellbeing at home (8,14). The  
90 situation could be worse in poor-resourced settings where infrastructural amenities, social  
91 support and health care systems are not adequately developed to ameliorate the plight of  
92 caregivers of children with CP (8,15). Therefore, the study was designed to explore the  
93 challenges faced by family caregivers of children with cerebral palsy in a resource-limited  
94 context in northern Ghana. This will serve as a basis for developing context-relevant services  
95 and policy initiatives to better the lives of caregivers and their children with CP.

## 96 **Methods**

### 97 **Design**

98 Essence or truth about the reality of a phenomenon is embodied in people's lived experiences. The  
99 principles of phenomenology research approach were employed to underpin the methods of this  
100 study as it aimed to describe the lived experiences of individuals caring for children with cerebral palsy.  
101 The qualitative research design literature shows that phenomenological principles acknowledge  
102 people's ties with their physical, social, and emotional world (16–21). Thus, whilst a descriptive  
103 qualitative approach could equally be used to unearth the data required in this study to explain the  
104 experiences of carers of children with cerebral palsy, the phenomenological approach fitted in better  
105 (16,19). Caring for a child with special needs is unique and has special meaning for the individuals  
106 involved. Being a parent of a child with cerebral palsy is emotionally and physically unpleasant as the  
107 child cannot live like other children, and the care could be daunting, especially in settings where  
108 assistive devices to aid daily living are absent. Sociocultural factors place the child and their family in  
109 a disadvantaged position. For instance, beliefs about disabilities like those associated with cerebral  
110 palsy are associated with mystical causes such as a curse or punishment by other individuals or the  
111 ancestors for disobedience of an inappropriate action that provokes consequences. To understand,  
112 interpret and describe the caregiving process of such children as it is to the individuals who live it  
113 requires using procedures that ensure that the lived experiences of the individuals are appropriately  
114 unearthed.

### 115 **Participants and Setting**

116 Thirteen family caregivers of children with CP participated in the study. We included  
117 individuals who resided with and provided care daily for a child under 18 years of age,  
118 diagnosed by a qualified medical doctor and confirmed in their medical records to have CP.  
119 The recruitment of participants took place at a physiotherapy unit of the Tamale Teaching  
120 Hospital, the only tertiary hospital in the northern region of Ghana. The hospital provides  
121 specialist care and physiotherapy services for children with diverse needs, including CP. Most  
122 of the inhabitants in this setting are Muslims, but they also practice and revere the traditional  
123 African religion. Thus, they believe in their ancestors and supernatural powers (18), which  
124 could sometimes influence their perceptions about disease causation and management.  
125 Wholesale, retail and agricultural activities are the main occupation in the area (22).

### 126 **Sampling and recruitment**

127 Based on data saturation (23,24), a purposive non-probability sampling technique was adopted  
128 to recruit participants for the study. All participants were recruited during their routine

1  
2  
3 129 physiotherapy clinic appointment days. We observed COVID-19 protocols (maintaining social  
4 130 distancing, wearing Personal Protective Equipment (PPE) such as a nose mask or face shield  
5 131 and using hand sanitisers) during participant recruitment and data collection. We confirmed  
6 132 participants' inclusion by checking diagnoses from children's hospital records with the help of  
7 133 a physiotherapist to ensure that children had been duly diagnosed by a medical professional.  
8 134 We introduced the study aims and informed potential participants that involvement in the study  
9 135 was voluntary. Participants interested in joining the study were then provided further  
10 136 information using the information sheet. We guided participants who consented to participate  
11 137 in the research to sign/thumb print the consent form. MMM, a paediatric nurse specialist  
12 138 conducted all recruitment procedures and data collection. Though she had no prior relationship  
13 139 with participants in the study area, she was motivated to recruit and gain understanding of  
14 140 issues in this context.

#### 141 **Data collection**

142 Gathering participant demographic information such as caregiver relationship with the child,  
143 educational level, child age, marital status, and caregiver occupation preceded oral interviews  
144 for all consenting participants. These characteristics were collected to add more context to the  
145 study findings as they could diversely influence caregivers' experience. However, they were  
146 never used to select participants purposively. For pragmatic reasons and the challenges  
147 involved in bringing participants with different medical review dates together for focus group  
148 discussion, we conducted individual face-to-face interviews using an in-depth interview topic  
149 guide (supplementary file 1) developed by the researchers based on the study's objectives. The  
150 open-ended nature of questions in the interview guide, facilitated the exploration of issues  
151 based on each participant's responses (25,26). These interviews were either conducted in  
152 English language or the native language (Dagbani) at the hospital clinic based on the  
153 preferences of participants. All interviews were audio recorded and lasted 35-50 minutes. We  
154 wrote additional field notes to cover the observations made on each interviewee, and these were  
155 considered during the analysis for contextual issues. We conducted most interviews in the local  
156 Dagbani language. We manually transcribed recorded audio of interviews with participants  
157 verbatim into electronic text on a computer, taking cognisance of non-verbal cues captured in  
158 the field notes. We translated audio records in the local language (Dagbani) into English back-  
159 to-back to ensure we did not lose the meaning and were cross-checked between researchers for  
160 validation. Translated verbatim transcripts were also verified by a bilingual expert not part of  
161 the research team to ensure accuracy (27).



## 162 **Data analysis**

163 Inductive content analysis, as described by Elo and colleagues (28), was used to analyse the  
 164 data of this study. Content analysis is a systematic, replicable technique for compressing many  
 165 words of text into fewer content categories based on explicit coding rules. Participants'  
 166 transcripts were anonymised with letters and numbers such as 'P1' and 'P2'. All authors then  
 167 read the transcripts repeatedly and compared samples with the interview audio files. We  
 168 generated the codes inductively by highlighting critical ideas from the data. We then copied  
 169 these codes and grouped them into subcategories based on their relationship. We further  
 170 grouped subcategories with similar meanings to form categories. We reviewed and compared  
 171 categories and subcategories with the code and the entire dataset to ensure that we captured the  
 172 meaning of the entire dataset as presented by participants in the interviews.

## 173 **Ethical considerations**

174 Our study was of low risk to children and caregivers. However, we observed all relative ethical  
 175 issues, including maintaining privacy and confidentiality, upholding the autonomy of  
 176 caregivers, occasioning voluntary involvement and obtaining informed consent. We also  
 177 involved a third party to assess our ethical conduct and provide ethical clearance. We, therefore,  
 178 obtained ethical approval from the Committee on Human Research, Publication and Ethics  
 179 (CHRPE) of Kwame Nkrumah University of Science and Technology (KNUST), Ghana, with  
 180 reference number CHRPE/AP/231/21 and the Department of Research and Development of the  
 181 Tamale Teaching Hospital with reference number TTH/R&D/SR/039, who also provided  
 182 administrative permission for the study setting.

## 183 **Findings**

184 We interviewed thirteen (13) family caregivers to generate data for understanding their  
 185 perspectives on the challenges they face caring for children with CP. All caregivers were  
 186 women, 12 being biological parents to the child with CP. The majority were middle-aged  
 187 women aged 30-68 years, with a mean age of thirty-nine. Most 10(77%) of the children were  
 188 between 2-4 years old. Table 1 presents the detailed demographic information of participants.

189 *Table 1: Demographic Characteristics of Participants*

| Demographics           | Frequency (n) | Percentage (%) |
|------------------------|---------------|----------------|
| Caregiver relationship |               |                |
| Mother                 | 12            | 92             |

|                                        |    |    |
|----------------------------------------|----|----|
| Grandmother                            | 1  | 8  |
| <b>Age of caregiver</b>                |    |    |
| 30-39                                  | 10 | 76 |
| ≥ 40-49                                | 3  | 24 |
| <b>Mean age</b>                        | 39 |    |
| <b>Educational level caregiver</b>     |    |    |
| SHS and below                          | 4  | 31 |
| Tertiary                               | 6  | 46 |
| No formal education                    | 3  | 23 |
| <b>Occupation of Caregiver</b>         |    |    |
| Trading                                | 5  | 38 |
| Nurse                                  | 2  | 15 |
| Teacher                                | 1  | 8  |
| Environmental health officer           | 1  | 8  |
| Unemployed                             | 4  | 31 |
| <b>Marital status of the caregiver</b> |    |    |
| Married                                | 11 | 84 |
| Single                                 | 1  | 8  |
| Widow                                  | 1  | 8  |
| <b>Age of child with CP</b>            |    |    |
| <2 years                               | 2  | 15 |
| 2-4                                    | 10 | 77 |
| 5-7                                    | 1  | 8  |
| <b>Type of CP</b>                      |    |    |
| Spastic                                | 5  | 38 |
| Not stated                             | 8  | 62 |

190

191 Three main categories, namely, sociocultural issues, sheer physical care burden and economic  
 192 challenges, emerged from the data and are detailed in Figure 1.

### 193 **Sociocultural challenges**

194 The results depict society's cultural and intuitive beliefs about CP and its impact on caregivers.  
 195 Social cultural challenges emerged as a significant category from the data, describing the  
 196 relationships and difficulties caregivers encounter as they interact with society and formal  
 197 institutions on issues related to their child with CP. Caregivers also reported how the  
 198 sociocultural viewpoints make society hostile towards them and challenging living with a child

199 with CP. Salient challenges narrated by caregivers included stigma, misconceptions about CP,  
200 inadequate health care services, and problem of accessibility to formal education.

201 *Stigma from others:*

202 Caregivers recounted how they felt humiliated by society because of their child's condition,  
203 CP. For instance, according to p11, the caregiver of a 2-year-old child with CP, she cannot  
204 attend social gatherings because of how her child is addressed as shown in their statement.  
205 Caregivers spoke of how their children were described in foul language, such as not being a  
206 human being but as snakes by neighbours and friends.

207 *Whenever there is an 'occasion' (marriage, naming ceremonies and funerals), I do not*  
208 *go because of how they treat the child; I do not like it. People will just be calling her*  
209 *all sorts of names, saying she is not human, so I should not waste my time on her (p11,*  
210 *caregiver of a 2year old girl).*

211 Like the p11 account, p6 also demonstrates that society's attitudes towards their child's CP  
212 make her feel that she is a subject of ridicule. She suggests that even though people in her  
213 circles know about her child's condition, suggesting that the child may not be able to walk  
214 independently, they continue to ask questions about her child not walking to spite her, as she  
215 recounts in the quote below.

216 *We are now laughing stock to most people, some people know what the child is going*  
217 *through, and they will see you and intentionally ask you, so your child is still not*  
218 *walking 'Penh'? Sometimes in a car like this, they do not even want you to sit closer to*  
219 *them, or the child should touch them... (P6 caregiver of a 2year boy).*

220 Other caregivers also felt discrimination against their children, as they were not allowed to  
221 associate with other children. Thus, the child and caregiver could not freely relate with others  
222 due to emotional trauma and stigmatisation from others. Such constraints encountered by  
223 caregivers observed in their sample narrations are as follows:

224 *As for discrimination, it exists. Some relatives do not allow their children closer to my*  
225 *child because they feel he is not normal (p5 caregiver of a 7year boy).*

226 A caregiver added that the challenges in caring for a child with CP in the community are  
227 compounded by community members believing that CP results from punishment from the gods,  
228 and others say children with CP are spirits. According to them, such claims provoke emotional  
229 pain. It also appears such perceptions compel caregivers to seek a cure and on whether the  
230 children were spirits or are punished by the gods from spiritualists.

231 *Others make insulting remarks like this your child is not a human being. We have even*  
232 *visited a shrine on several occasions because of that... They will give herbal*  
233 *preparation to bathing the child; if he is not human, he will die after bathing those*

234 *herbs. But after bathing him, it is clear that he is not what they were thinking of (p3*  
235 *caregiver of a 4year, 9months boy)*

236 *Inadequate health information provision:*

237 Adequate information on CP and optimal care strategies could reduce caregivers' challenges.  
238 However, the data show that caregivers did not feel healthcare professionals gave them enough  
239 information to understand, cope and care for their children. The lack of information made some  
240 caregivers believe in the community's claims about their child and confuse the exact nature of  
241 their child's condition. As shown by p5, even though health workers took the history of their  
242 child's condition, the health workers failed to give them information about the condition.  
243 Indeed, due to this limited information given, caregivers with English literacy who could surf  
244 the Internet resorted to finding information about their child's condition, as demonstrated by  
245 caregiver p6.

246 *They asked me questions some time ago about the child's condition, which they wrote down,*  
247 *but I have not been given any information regarding his condition since then... they only said*  
248 *we should come to this place (referring to the physio unit) and do the exercise (p5, caregiver*  
249 *of a 7year boy).*

250 Meanwhile, caregivers appeared to suggest that they had to demand information about their  
251 child's condition without success persistently. Even though P6 reports show that the Internet  
252 has helped them to understand their child's condition better, finding information from the  
253 Internet that is not censored could be misleading as there are sources that may not be credible.  
254 Thus, a lack of adequate information from health workers could compel caregivers to sources  
255 of information that may lead to practices harmful to the child.

256 *At first, I did not know what was wrong with him because the doctors would not give*  
257 *me more information about this condition...Now I am beginning to understand because*  
258 *I browse and read about it. . . (p6, caregiver of a 2year boy).*

259 *Poor access to formal education:*

260 Another challenge caregivers encountered was that they could not find a suitable school that  
261 would render quality education for their children. Some mothers felt their children would not  
262 be accepted into the mainstream due to their condition, and special schools were unavailable.  
263 Thus, all schools within reach of caregivers were not resourced to admit children with special  
264 needs like CP. Some community members who seem not to know the depth of the child  
265 schooling problem kept recommending that the child be taken to school. See the following  
266 expressions of p11.

267 *They said I should take her to school, but in our place, they will not admit her. They said she*  
268 *could not sit, and she could not walk... When you send her to these regular schools, they will*

269 *not take her. Moreover, no school in our area trains such children (p11, caregiver of a 3year*  
270 *old girl).*

271 **Sheer physical care burden:**

272 Caregivers also recounted the challenges with providing activities of daily living such as  
273 bathing, dressing, and moving their child, among others, whilst maintaining their routine  
274 responsibilities to themselves and other family members, such as other children, mostly without  
275 support from others.

276 **Strenuous daily care**

277 Caregivers lamented about the exhausting nature of caring for a child with CP. Due to the  
278 physical and neurological incapacities of the child, they depend exclusively on their caregivers  
279 to meet all their needs. Most participants of this study experienced struggles in meeting the  
280 demands of children's daily care. Caregivers' reports indicate that lifting and moving their  
281 children were particularly challenging as it affected their wellbeing, as stated by p3 and p5.

282 *I usually feel tired due to carrying him always. It is a problem lifting him. I sometimes*  
283 *get some body pain due to carrying him because he will not sit, so I do all the time I am*  
284 *carrying him. I pray he can walk someday. If not, he will be a burden while growing up*  
285 *because I cannot carry him (p3, caregiver of a 4year, 9months boy).*

286 *I feel so tired of caring for him because he has a younger sibling I have to cater. At his*  
287 *age (7 years), he should have been able to bathe and move about, but I still have to do*  
288 *it (p5, caregiver of a 7year boy).*

289 Caregivers expressed experiencing pain and having to depend on pain medications to relieve  
290 themselves due to the strenuous nature of the care they provide for their child with CP.  
291 Caregivers also commented that the care became more challenging as their child grew older,  
292 as younger children were easier to manage. As seen in the statement of p8, the difficulty with  
293 the care is associated with having to lift and move the children, as they grow physically and  
294 increase in size and weight. Indeed, an increase in size and weight would make caring for a  
295 child more demanding. However, the child with CP who has neurodevelopment challenges,  
296 normally limp and with flappy body parts, and involuntary movements that they may not be  
297 able to control, as seen in p8 submission, suggests that their care becomes more complicated  
298 without any support or physical aides.

299 *When you wear him his clothes, you will struggle with him. He won't relax his hands;*  
300 *he will just stiffen them and make himself hard. You will struggle, and he will continue*  
301 *to make his hands like that. . . . I Am fed up with 'kora.' (p8, caregiver of 4year old*  
302 *boy)*

1  
2  
3 303 **Inadequate support from social networks:**

4 304 Besides the challenges involved in the care, caregivers also indicated that they received  
5  
6 305 minimal or no support from family members and others in providing care for their child. Most  
7  
8 306 caregivers expressed concerns that their children may be abandoned without the primary  
9  
10 307 caregiver.

11  
12 308 *It is not easy to get someone to care for him, especially when I am not feeling well. I*  
13 309 *still have to manage and care for him because, the way he is, who will have time to take*  
14 310 *care of him? (p3, caregiver of a 4year, 9months boy).*

15  
16 311 As shown in the demographics, most caregivers were females and mothers to the children.  
17  
18 312 Although the caregiving role is traditionally a woman's role, and thus consistent with the  
19  
20 313 findings of this study, considering the additional needs of the child with CP and also the  
21  
22 314 emerging trend that women have more roles than caregiving, it would be expected the  
23  
24 315 caregivers received care, at least from the spouses. However, the statement from p3 captures  
25  
26 316 the experiences of most of the caregivers in terms of support from their spouses.

27 317 *With this one, my husband is not helping me care for him. Do you think I will try to give*  
28 318 *birth again? He does not mind us any longer. At least once in a while, he should also*  
29 319 *pick him, and I will also rest, but he doesn't. (p3, caregiver of a 4year, 9months boy)*

30  
31  
32 320 **Economic challenges**

33 321 The cost of care globally is a challenging issue as it requires a constant flow of money. The  
34  
35 322 special needs of children with a disability such as CP increase the financial burden in the  
36  
37 323 amount required for the care and the loss of hours for the family to work and gain their normal  
38  
39 324 income. The caregivers in this study demonstrated in the submission that their sources of  
40  
41 325 income were interrupted, and they had financial limitations in meeting the child's care needs.

42 326 **Financial limitations:**

43 327 Having a child with CP means having an expenditure line inconsistent with routine household  
44  
45 328 expenses, thus raising the cost of a family's budget. Most caregivers employed and  
46  
47 329 unemployed, described their experience of having increased expenditures due to buying  
48  
49 330 medications, assistive devices, transportation costs, laboratory investigations, and food buying.  
50  
51 331 The latter placed an extra financial burden on caregivers who may not also receive financial  
52  
53 332 support as there is no clear, steady formal support for the vulnerable in Ghana. As indicated  
54  
55 333 earlier, the relationships of the caregiver and the child are not supportive enough to consider  
56  
57 334 providing the caregiver with monetary support for caregiving. See the submission of p6 and  
58  
59 335 p10.  
60

336 ...I am supposed to be coming for review once every week, but because of the cost of  
337 transportation, I have made it once every two weeks (p6 caregiver of a 2year boy).

338 In this place (referring to the physio unit), I was told that health insurance would cover  
339 some part and you would also pay the rest after ... sometimes. 'Hmmm'.... It is not easy  
340 . . . I have even stopped the neurological consult because you have to pay for the  
341 consultation and still buy the drugs. After all, the hospital does not always have them  
342 (p10, caregiver of a 4year boy).

#### 343 Interrupted personal income:

344 Besides the increased expenditure, caregivers' economic situation was reportedly made worse  
345 when they could no longer engage in income-earning activities. Participants' reports show that  
346 the caregiving demands of their children led to them abandoning their employments as they  
347 could not combine the care of the child who is a full-time job with their income-generating  
348 activities, as shown in the quotes from participants, p10 and p3.

349 *I am no longer employed and cannot do any work again. I worked in a private hospital  
350 before I gave birth, but now this child is like this. I have stopped my employment  
351 because he has this problem (cerebral palsy) (p10, caregiver of a 4year boy).*

352 *I am no longer in business because I can't be holding him while preparing my local  
353 drinks, and there is no one to help. Where will I be getting money for his care? (p3,  
354 caregiver of a 4year, 9months boy).*

355 Many of the caregivers who were initially engaged in personal businesses for income had their  
356 businesses collapse because they did not have time to continue trading. Other caregivers  
357 stopped because of the stress of juggling childcare and business. Caregivers were then left to  
358 deal with the effects of these income cuts and rising expenditures.

## 359 Discussion

360 Care for children with special needs such as CP is challenging in even advanced jurisdictions  
361 with better societal literacy and technologically derived assistive devices for care (29–31). Our  
362 findings show that caregivers encounter sociocultural, physical, and economic challenges  
363 associated with caring for their child with CP. This study's findings resonate with existing  
364 evidence and signpost critical contextual and global issues that need consideration to develop  
365 support systems and relevant interventions. Our finding indicates that caregivers of children  
366 with CP face physical care burdens. Due to muscle spasticity, weakness and uncoordinated  
367 motor control, children with CP rely mainly on their caregivers for physical care, irrespective  
368 of age (32). Indeed, motor dysfunction may worsen due to weight as children with CP grow  
369 (33). Although there are assistive devices for aiding in the care of sick individuals with  
370 neuromuscular inadequacies and self-care deficit (34), the caregivers in this study had to lift

1  
2  
3 371 and move their children manually, without such devices, resulting in caregivers' altered  
4  
5 372 wellbeing such as aches and pains sometimes requiring medical attention. Meanwhile, the  
6  
7 373 wellbeing of caregivers is critical, considering that most children with CP depend solely on  
8  
9 374 them for their care (35,36). It might therefore be useful to not only solicit the support of social  
10  
11 375 networks to assist primary caregivers, but it might be more sustainable for health professionals  
12  
13 376 to assist caregivers in learning manual handling and body mechanics to empower them to lift  
14  
15 377 and move children with minimal impact on the health of caregivers (37,38).

16 378 Cerebral palsy is an old-age neurological condition with scientifically generated evidence on  
17  
18 379 its course. Despite this, the relations of children with CP and caregivers misunderstand CP in  
19  
20 380 many contexts, especially in settings with limited general literacy(39), leading to attribution of  
21  
22 381 the condition to supernatural causes, such as punishment from the gods and witchcraft, as  
23  
24 382 reported in this study and others (39,40). The setting of the study, as shown in the  
25  
26 383 demographics, has the majority of the people being superstitious about health and other social  
27  
28 384 issues, as played out in the reports of caregivers, that their children with CP were allegedly  
29  
30 385 perceived as being spirit children and being punished by the gods. The perceptions were  
31  
32 386 translated into the level of community engagement with the caregivers and the children.  
33  
34 387 Existing evidence shows that beliefs of witchcraft and punishment by the gods lead to labelling,  
35  
36 388 stigmatisation and discrimination against families and children with CP (40). Lack of support  
37  
38 389 for caregivers resulting from stigma has been reported in the existing literature (9,14). This  
39  
40 390 limited support could compound the innate challenges of having a child with special needs.  
41  
42 391 Thus, society's understanding of CP is critical in reducing stigmatisation and discrimination  
43  
44 392 against families with children with CP and the associated cyclical effect on the child and  
45  
46 393 caregivers. It is therefore critical that health information on CP is intensified to ensure that  
47  
48 394 communities understand the causes and course of CP, promoting empathy and involvement of  
49  
50 395 support systems in providing care for the child to improve their quality of life.

51 396 In Ghana, the health service and other interested groups, such as faith-based institutions and  
52  
53 397 churches, are critical in providing service users and communities with health information.  
54  
55 398 However, the study's findings suggest that even primary caregivers of children with CP receive  
56  
57 399 limited information about the condition. Limited information on health issues and services is a  
58  
59 400 global challenge (41–43). However, challenging settings such as Ghana, with limited economic  
60  
401 independence, are worst in this regard (13,44–48). Anecdotal evidence from the study setting  
402  
403 suggests that health professionals provide ad hoc health education to caregivers of children  
with CP and other disabilities, using medical terms that caregivers and their support systems



1  
2  
3 404 may not understand. Yet, there is evidence that adequate caregiver knowledge may promote  
4  
5 405 better care for children with CP (46,49) and the provision of health information to health  
6  
7 406 services users is expected to be acknowledged as a right (50–52). Indeed, the trend of breaching  
8  
9 407 the gap in service users' understanding of health issues and thus contributing effectively to  
10  
11 408 service provision is through deliberate efforts to ensure public participation (53). Therefore, to  
12  
13 409 forestall the challenges communities encounter with their health management, conscious  
14  
15 410 efforts must be made to utilise evidence such as that identified in this study and introduce  
16  
17 411 appropriate interventions at every health service level.

18 412 Existing evidence suggests that children with CP without cognitive impairment could benefit  
19  
20 413 from formal education (54), and caregivers reported that one of their challenges was finding  
21  
22 414 school placement for their children with CP. Besides providing children with CP to explore  
23  
24 415 their potential and contribute to their development, formal school systems health programmes  
25  
26 416 have been a strategy health professionals use to deliver information on health issues to children  
27  
28 417 and could be a means for delivering health information to children with CP. Nevertheless,  
29  
30 418 accessibility to educational infrastructure was a challenge for caregivers. Although Ghana has  
31  
32 419 an all-inclusive education policy (55), it thus appears most schools in this setting do not have  
33  
34 420 the capacity in terms of human resources and space to admit children with CP. Parents have  
35  
36 421 also reported lack of formal education opportunities in studies conducted in India and Kenya,  
37  
38 422 where parents lamented their inability to find appropriate schools for their children with  
39  
40 423 disability (45,56,57). Besides contributing to health care and the child's growth and  
41  
42 424 development, formal education reduces children's time with their caregivers. This allows  
43  
44 425 caregivers to engage in income-generating activities that could lessen the financial burden of  
45  
46 426 having a child with cerebral palsy (45,58,59). Ghana's National Health Insurance Scheme,  
47  
48 427 meant to lessen the burden of health care costs on service users, currently operates a cost-  
49  
50 428 sharing system, and patients must make out-of-pocket payments to obtain some critical services  
51  
52 429 (60). The latter indicates that the caregivers could more than communicate the health financial  
53  
54 430 burden on caregivers in this study's setting. Even though the economic challenges for  
55  
56 431 caregivers in this study are unavoidable, considering that the setting is generally a deprived  
57  
58 432 area, the absence or limited financial support could limit caregivers' ability to access all  
59  
60 433 necessities, such as rehabilitation services for the care of their child as reported in other studies  
61  
62 434 (58).

63 435 Conclusively, contextual issues related to child physical care, cultural perceptions, health  
64  
65 436 information needs, and education created problems for caregivers, and these must be translated

1  
2  
3 437 into appropriate community and health system response. The findings suggest that caregivers  
4  
5 438 have a candid idea of daily challenges, and they should be appropriately involved in designing  
6  
7 439 innovative services or health care interventions.

8  
9 440 **Funding statement:** This research received no specific grant from any funding agency in the  
10  
11 441 public, commercial or not-for-profit sectors.

12  
13 442 **Competing interests' statement:** No competing interests to declare.

14  
15 443 **Author contribution:** MMM, YNA and MWK conceptualise the study, methodology, and  
16  
17 444 literature review. MMM and JNS undertook the data collection, transcription, and analysis.  
18  
19 445 YNA reviewed transcript compared with audios, JNS and MWK drafted the manuscript. MWK  
20  
21 446 and MMM reviewed manuscript for intellectual content. All authors read and approved the  
22  
23 447 final manuscript for publication.

24  
25 448 **Data Availability:** All data relevant to the study are included in the article

#### 26 27 449 **Patient and Public Involvement**

28  
29  
30 450 Patients or the public were not involved in the design, or conduct, or reporting, or dissemination  
31  
32 451 plans of our research.

#### 33 34 452 **References**

- 35  
36 453 1. Sellier E, Platt MJ, Andersen GL, Krägeloh-Mann I, De La Cruz J, Cans C, et al.  
37  
38 454 Decreasing prevalence in cerebral palsy: a multi-site European population-based study,  
39  
40 455 1980 to 2003. *Dev Med Child Neurol* [Internet]. 2016 Jan 1 [cited 2022 Nov  
41  
42 456 16];58(1):85–92. Available from:  
43  
44 457 <https://onlinelibrary.wiley.com/doi/full/10.1111/dmcn.12865>
- 45  
46 458 2. McIntyre S, Taitz D, Keogh J, Goldsmith S, Badawi N, Blair E. A systematic review  
47  
48 459 of risk factors for cerebral palsy in children born at term in developed countries. *Dev*  
49  
50 460 *Med Child Neurol* [Internet]. 2013 Jun 1 [cited 2022 Nov 16];55(6):499–508.  
51  
52 461 Available from: <https://onlinelibrary.wiley.com/doi/full/10.1111/dmcn.12017>
- 53  
54 462 3. Oskoui M, Coutinho F, Dykeman J, Jetté N, Pringsheim T. An update on the  
55  
56 463 prevalence of cerebral palsy: a systematic review and meta-analysis. *Dev Med Child*  
57  
58 464 *Neurol* [Internet]. 2013 Jun [cited 2022 Nov 16];55(6):509–19. Available from:  
59  
60 465 <https://pubmed.ncbi.nlm.nih.gov/23346889/>

- 1  
2  
3 466 4. Chounti A, Hägglund G, Wagner P, Westbom L. Sex differences in cerebral palsy  
4 467 incidence and functional ability: a total population study. *Acta Paediatr* [Internet].  
5 468 2013 [cited 2022 Nov 16];102(7):712–7. Available from:  
6  
7 469 <https://pubmed.ncbi.nlm.nih.gov/23551760/>
- 8  
9  
10 470 5. Dan B, Paneth N. Making sense of cerebral palsy prevalence in low-income countries.  
11 471 *Lancet Glob Heal* [Internet]. 2017 Dec 1 [cited 2022 Nov 16];5(12):e1174–5.  
12 472 Available from: <http://www.thelancet.com/article/S2214109X17304205/fulltext>
- 13  
14 473 6. Van Naarden Braun K, Doernberg N, Schieve L, Christensen D, Goodman A, Yeargin-  
15 474 Allsopp M. Birth Prevalence of Cerebral Palsy: A Population-Based Study. *Pediatrics*  
16 475 [Internet]. 2016 Jan 1 [cited 2022 Oct 27];137(1). Available from:  
17 476 <https://pubmed.ncbi.nlm.nih.gov/26659459/>
- 18  
19  
20 477 7. Kyeremateng JDA, Edusei A, Dogbe JA, Opoku MP, Nketsia W, Hammond C, et al.  
21 478 Experiences of primary caregivers of children with cerebral palsy across the trajectory  
22 479 of diagnoses in Ghana. *African J Disabil*. 2019;8.
- 23  
24 480 8. Raina P, O'Donnell M, Rosenbaum P, Brehaut J, Walter SD, Russell D, et al. The  
25 481 health and well-being of caregivers of children with cerebral palsy. *Pediatrics*  
26 482 [Internet]. 2005 Jun [cited 2022 Oct 4];115(6). Available from:  
27 483 <https://pubmed.ncbi.nlm.nih.gov/15930188/>
- 28  
29  
30 484 9. Majnemer A, Shevell M, Law M, Poulin C, Rosenbaum P. Indicators of distress in  
31 485 families of children with cerebral palsy. *Disabil Rehabil* [Internet]. 2012 [cited 2022  
32 486 Nov 16];34(14):1202–7. Available from: <https://pubmed.ncbi.nlm.nih.gov/22235883/>
- 33  
34 487 10. Galpin J, Barratt P, Ashcroft E, Greathead S, Kenny L, Pellicano E. “The dots just  
35 488 don’t join up”: Understanding the support needs of families of children on the autism  
36 489 spectrum. *Autism* [Internet]. 2018 Jul 1 [cited 2022 Nov 16];22(5):571–84. Available  
37 490 from: <https://pubmed.ncbi.nlm.nih.gov/28449587/>
- 38  
39  
40 491 11. Rajan AM, John R. Resilience and impact of children’s intellectual disability on Indian  
41 492 parents. <https://doi.org/10.1177/1744629516654588> [Internet]. 2017 Feb 7 [cited 2022  
42 493 Nov 16];21(4):315–24. Available from:  
43 494 [https://journals.sagepub.com/doi/10.1177/1744629516654588?url\\_ver=Z39.88-  
44 495 2003&rfr\\_id=ori%3Arid%3Acrossref.org&rfr\\_dat=cr\\_pub++0pubmed](https://journals.sagepub.com/doi/10.1177/1744629516654588?url_ver=Z39.88-2003&rfr_id=ori%3Arid%3Acrossref.org&rfr_dat=cr_pub++0pubmed)

- 1  
2  
3 496 12. Romley JA, Shah AK, Chung PJ, Elliott MN, Vestal KD, Schuster MA. Family-  
4 497 Provided Health Care for Children With Special Health Care Needs. *Pediatrics*  
5 498 [Internet]. 2017 Jan 1 [cited 2022 Nov 16];139(1):e20161287–e20161287. Available  
6 499 from: <https://europepmc.org/article/med/28028202>
- 10 500 13. Resch JA, Mireles G, Benz MR, Grenwelge C, Peterson R, Zhang D. Giving parents a  
11 501 voice: A qualitative study of the challenges experienced by parents of children with  
12 502 disabilities. *Rehabil Psychol* [Internet]. 2010 May [cited 2022 Nov 16];55(2):139–50.  
13 503 Available from: /record/2010-09922-004
- 18 504 14. Dambi JM, Jelsma J, Mlambo T. Caring for a child with Cerebral Palsy: The  
19 505 experience of Zimbabwean mothers. *African J Disabil* [Internet]. 2015 Aug 13 [cited  
20 506 2022 Nov 16];4(1). Available from: /pmc/articles/PMC5433478/
- 24 507 15. Hamzat THK, Mordi EL. Impact of caring for children with cerebral palsy on the  
25 508 general health of their caregivers in an African community. *Int J Rehabil Res*  
26 509 [Internet]. 2007 Sep [cited 2022 Oct 4];30(3):191–4. Available from:  
27 510 <https://pubmed.ncbi.nlm.nih.gov/17762763/>
- 31 511 16. Alase A. The Interpretative Phenomenological Analysis (IPA): A Guide to a Good  
32 512 Qualitative Research Approach. *Int J Educ Lit Stud* [Internet]. 2017 Apr 30 [cited  
33 513 2023 Mar 12];5(2):9–19. Available from:  
34 514 <https://journals.aiac.org.au/index.php/IJELS/article/view/3400>
- 39 515 17. Creswell JW, Poth CN. *Qualitative Inquiry & Research Design + 30 Essential Skills*  
40 516 *for the Qualitative Researcher*. sage [Internet]. 2017 [cited 2022 Oct 27];459.  
41 517 Available from: <https://market.android.com/details?id=book-yMEKMQAACAAJ>
- 45 518 18. Neubauer BE, Witkop CT, Varpio L. How phenomenology can help us learn from the  
46 519 experiences of others. *Perspect Med Educ* [Internet]. 2019 Apr 1 [cited 2023 Mar  
47 520 12];8(2):90–7. Available from: <https://pubmed.ncbi.nlm.nih.gov/30953335/>
- 51 521 19. Van Manen M. But Is It Phenomenology? <https://doi.org/10.1177/1049732317699570>  
52 522 [Internet]. 2017 Mar 23 [cited 2023 Mar 12];27(6):775–9. Available from:  
53 523 <https://journals.sagepub.com/doi/full/10.1177/1049732317699570>
- 56 524 20. van Manen M. *Researching lived experience: Human science for an action sensitive*  
57 525 *pedagogy: Second Ed. Res Lived Exp Hum Sci an Action Sensitive Pedagog Second*

- 1  
2  
3 526 Ed [Internet]. 2016 Jun 16 [cited 2023 Mar 12];1–202. Available from:  
4  
5 527 <https://www.taylorfrancis.com/books/mono/10.4324/9781315421056/researching->  
6  
7 528 [lived-experience-max-van-manen](https://www.taylorfrancis.com/books/mono/10.4324/9781315421056/researching-lived-experience-max-van-manen)  
8  
9 529 21. Spiegelberg H. *Doing Phenomenology : Essays on and in Phenomenology*. 2012 [cited  
10  
11 530 2023 Mar 12];320. Available from:  
12  
13 531 [https://books.google.com/books/about/Doing\\_Phenomenology.html?id=BmUyBwAA](https://books.google.com/books/about/Doing_Phenomenology.html?id=BmUyBwAA)  
14  
15 532 QBAJ  
16  
17 533 22. Ghana Statistical Service. 2010 population & housing census : summary report of final  
18  
19 534 results. Accra: Ghana Statistical Service; 2012.  
20  
21 535 23. Dworkin SL. Sample Size Policy for Qualitative Studies Using In-Depth Interviews.  
22  
23 536 *Arch Sex Behav* 2012 416 [Internet]. 2012 Sep 12 [cited 2022 Nov 16];41(6):1319–20.  
24  
25 537 Available from: <https://link.springer.com/article/10.1007/s10508-012-0016-6>  
26  
27 538 24. Mason M. Sample Size and Saturation in PhD Studies Using Qualitative Interviews.  
28  
29 539 *Forum Qual Sozialforsch* [Internet]. 2010 [cited 2022 Nov 16];11(3). Available from:  
30  
31 540 [https://www.researchgate.net/publication/47408617\\_Sample\\_Size\\_and\\_Saturation\\_in\\_](https://www.researchgate.net/publication/47408617_Sample_Size_and_Saturation_in_PhD_Studies_Using_Qualitative_Interviews)  
32  
33 541 [PhD\\_Studies\\_Using\\_Qualitative\\_Interviews](https://www.researchgate.net/publication/47408617_Sample_Size_and_Saturation_in_PhD_Studies_Using_Qualitative_Interviews)  
34  
35 542 25. Stuckey H. The first step in Data Analysis: Transcribing and managing qualitative  
36  
37 543 research data. *J Soc Heal Diabetes*. 2014 Jun;02(01):006–8.  
38  
39 544 26. Britten N. *Qualitative interviews in healthcare*. [Internet]. 2nd ed. Pope C, May N,  
40  
41 545 editors. London: BMJ Books; 2006 [cited 2022 Jul 15]. 11–19 p. Available from:  
42  
43 546 [https://scholar.google.com/scholar\\_lookup?title=Qualitative interviews in](https://scholar.google.com/scholar_lookup?title=Qualitative+interviews+in+healthcare&pages=11-19&publication_year=1999&author=Britten%2CN)  
44  
45 547 [healthcare&pages=11-19&publication\\_year=1999&author=Britten%2CN](https://scholar.google.com/scholar_lookup?title=Qualitative+interviews+in+healthcare&pages=11-19&publication_year=1999&author=Britten%2CN)  
46  
47 548 27. Fossey E, Harvey C, McDermott F, Davidson L. Understanding and evaluating  
48  
49 549 qualitative research. *Aust N Z J Psychiatry* [Internet]. 2002 Dec [cited 2022 Oct  
50  
51 550 4];36(6):717–32. Available from: <https://pubmed.ncbi.nlm.nih.gov/12406114/>  
52  
53 551 28. Elo S, Kyngäs H. The qualitative content analysis process. *J Adv Nurs* [Internet]. 2008  
54  
55 552 Apr 1 [cited 2022 Oct 27];62(1):107–15. Available from:  
56  
57 553 <https://onlinelibrary.wiley.com/doi/full/10.1111/j.1365-2648.2007.04569.x>  
58  
59 554 29. Borst J. Caregivers of seriously disabled children and their relationship issues on the  
60  
555 labor market. *Popul Res Policy Rev* [Internet]. 2010 [cited 2022 Nov 29];24:467–88.

- 1  
2  
3 556 Available from: [http://humanexchange.hu/site/uploads/file/114-129\\_jb.pdf](http://humanexchange.hu/site/uploads/file/114-129_jb.pdf)  
4  
5  
6 557 30. Ni ZH, Ding S, Wu JH, Zhang S, Liu CY. Family Caregivers' Experiences of Caring  
7 558 for Children With Cerebral Palsy in China: A Qualitative Descriptive Study.  
8  
9 559 <https://doi.org/10.1177/00469580221121510> [Internet]. 2022 Sep 5 [cited 2022 Nov  
10 560 29];59:1–7. Available from:  
11  
12 561 <https://journals.sagepub.com/doi/full/10.1177/00469580221121510>  
13  
14  
15 562 31. Sajedi F, Alizad V, Malekkhosravi G, Karimlou M, Vameghi R. Depression in  
16 563 Mothers of Children with Cerebral Palsy and Its Relation to Severity and Type of  
17 564 Cerebral Palsy. *Acta Med Iran* [Internet]. 2010 [cited 2022 Nov 29];48(4):250–4.  
18  
19 565 Available from: <https://acta.tums.ac.ir/index.php/acta/article/view/4041>  
20  
21  
22 566 32. Elangkovan IT, Shorey S. Experiences and Needs of Parents Caring for Children with  
23 567 Cerebral Palsy: A Systematic Review. *J Dev Behav Pediatr* [Internet]. 2020 Dec 1  
24  
25 568 [cited 2022 Nov 28];41(9):730–9. Available from:  
26  
27 569 <https://pubmed.ncbi.nlm.nih.gov/33136702/>  
28  
29  
30 570 33. Rutz E, Thomason P. Natural history of cerebral palsy and outcome assessment.  
31 571 *Handb Hum Motion* [Internet]. 2018 Apr 4 [cited 2022 Nov 28];2–3:1053–73.  
32  
33 572 Available from: [https://link.springer.com/referenceworkentry/10.1007/978-3-319-14418-4\\_49](https://link.springer.com/referenceworkentry/10.1007/978-3-319-14418-4_49)  
34  
35 573  
36  
37 574 34. Patel DR, Neelakantan M, Pandher K, Merrick J. Cerebral palsy in children: a clinical  
38 575 overview. *Transl Pediatr* [Internet]. 2020 [cited 2022 Nov 28];9(Suppl 1):S125–35.  
39  
40 576 Available from: <https://pubmed.ncbi.nlm.nih.gov/32206590/>  
41  
42  
43 577 35. Gokcin Eminel A, Kahraman T, Genc A. Physical workload during caregiving  
44 578 activities and related factors among the caregivers of children with cerebral palsy. *Ir J*  
45 579 *Med Sci* [Internet]. 2021 May 1 [cited 2022 Nov 28];190(2):701–9. Available from:  
46  
47 580 <https://pubmed.ncbi.nlm.nih.gov/32789552/>  
48  
49  
50  
51 581 36. Grigger K. Cerebral palsy: an overview. . *Am Fam Physician* [Internet]. 2006 [cited  
52 582 2022 Nov 28];73:91–100. Available from:  
53  
54 583 <https://www.google.com/search?q=KRIGGER%2C+K.+W.+2006.+Cerebral+palsy%3A+an+overview.+American+family+physician%2C+73%2C+91-100.&oq=KRIGGER%2C+K.+W.+2006.+Cerebral+palsy%3A+an+overview.+American+family+physician%2C+73%2C+91->  
55  
56 584  
57 585  
58 586  
59  
60

- 1  
2  
3 587 100.&aqs=chrome..69i57.1052j0j7&sourceid=chrome&ie=UTF-8  
4  
5  
6 588 37. Asuquo EG, Tighe SM, Bradshaw C. Interventions to reduce work-related  
7  
8 589 musculoskeletal disorders among healthcare staff in nursing homes; An integrative  
9  
10 590 literature review. *Int J Nurs Stud Adv*. 2021 Nov 1;3:100033.  
11  
12 591 38. Prall J, Ross M. The management of work-related musculoskeletal injuries in an  
13  
14 592 occupational health setting: the role of the physical therapist. *J Exerc Rehabil*  
15  
16 593 [Internet]. 2019 Apr 1 [cited 2022 Nov 28];15(2):193. Available from:  
17  
18 594 /pmc/articles/PMC6509454/  
19  
20 595 39. Baffoe M. Stigma, Discrimination & Marginalization: Gateways to Oppression of  
21  
22 596 Persons with Disabilities in Ghana, West Africa, Michael Baffoe – WATHI. *Africa J*  
23  
24 597 *Educ Soc Res* 3(1), 187-187 [Internet]. 2013 [cited 2022 Nov 16];3(1):187–187.  
25  
26 598 Available from: [https://www.wathi.org/stigma-discrimination-marginalization-](https://www.wathi.org/stigma-discrimination-marginalization-gateways-to-oppression-of-persons-with-disabilities-in-ghana-west-africa-michael-baffoe/)  
27  
28 600 [gateways-to-oppression-of-persons-with-disabilities-in-ghana-west-africa-michael-](https://www.wathi.org/stigma-discrimination-marginalization-gateways-to-oppression-of-persons-with-disabilities-in-ghana-west-africa-michael-baffoe/)  
29  
30 601 40. Opoku MP, Peprah Opoku M, Alupo BA, Gyamfi N, Odame L, Mprah WK, et al. The  
31  
32 602 Family and Disability in Ghana: Highlighting Gaps in Achieving Social Inclusion.  
33  
34 603 *Disabil CBR Incl Dev* [Internet]. 2018 Mar 16 [cited 2022 Nov 16];28(4):41.  
35  
36 604 Available from: <http://dcidj.org//articles/10.5463/dcid.v28i4.666/>  
37  
38 605 41. Clarke MA, Moore JL, Steege LM, Koopman RJ, Belden JL, Canfield SM, et al.  
39  
40 606 Health information needs, sources, and barriers of primary care patients to achieve  
41  
42 607 patient-centered care: A literature review. *Health Informatics J* [Internet]. 2016 Dec 1  
43  
44 608 [cited 2022 Nov 29];22(4):992–1016. Available from:  
45  
46 609 [https://journals.sagepub.com/doi/10.1177/1460458215602939?url\\_ver=Z39.88-](https://journals.sagepub.com/doi/10.1177/1460458215602939?url_ver=Z39.88-2003&rfr_id=ori%3Arid%3Acrossref.org&rfr_dat=cr_pub++0pubmed)  
47  
48 610 [2003&rfr\\_id=ori%3Arid%3Acrossref.org&rfr\\_dat=cr\\_pub++0pubmed](https://journals.sagepub.com/doi/10.1177/1460458215602939?url_ver=Z39.88-2003&rfr_id=ori%3Arid%3Acrossref.org&rfr_dat=cr_pub++0pubmed)  
49  
50 611 42. Budtz S, Witt K. Consulting the Internet before visit to general practice. Patients' use  
51  
52 612 of the Internet and other sources of health information. *Scand J Prim Health Care*  
53  
54 613 [Internet]. 2002 Sep [cited 2022 Nov 29];20(3):174–6. Available from:  
55  
56 614 <https://pubmed.ncbi.nlm.nih.gov/12389756/>  
57  
58 615 43. Avery JC, Braunack-Mayer AJ. The information needs of women diagnosed with  
59  
60 616 Polycystic Ovarian Syndrome--implications for treatment and health outcomes. *BMC*  
61  
617 617 *Womens Health* [Internet]. 2007 Jun 20 [cited 2022 Nov 29];7. Available from:

- 1  
2  
3 618 <https://pubmed.ncbi.nlm.nih.gov/17578583/>  
4  
5  
6 619 44. Atakro CA, Atakro A, Aboagye JS, Blay AA, Addo SB, Agyare DF, et al. Older  
7 620 people's challenges and expectations of healthcare in Ghana: A qualitative study.  
8 621 PLoS One [Internet]. 2021 Jan 1 [cited 2022 Nov 16];16(1):e0245451. Available from:  
9 622 <https://journals.plos.org/plosone/article?id=10.1371/journal.pone.0245451>  
10  
11  
12  
13 623 45. Vadivelan K, Sekar P, Sruthi SS, Gopichandran V. Burden of caregivers of children  
14 624 with cerebral palsy: An intersectional analysis of gender, poverty, stigma, and public  
15 625 policy. BMC Public Health [Internet]. 2020 May 8 [cited 2022 Nov 16];20(1):1–8.  
16 626 Available from: [https://bmcpublihealth.biomedcentral.com/articles/10.1186/s12889-](https://bmcpublihealth.biomedcentral.com/articles/10.1186/s12889-020-08808-0)  
17 627 [020-08808-0](https://bmcpublihealth.biomedcentral.com/articles/10.1186/s12889-020-08808-0)  
18  
19  
20  
21  
22 628 46. Zuurmond M, Nyante G, Baltussen M, Seeley J, Abanga J, Shakespeare T, et al. A  
23 629 support programme for caregivers of children with disabilities in Ghana:  
24 630 Understanding the impact on the wellbeing of caregivers. Child Care Health Dev  
25 631 [Internet]. 2019 Jan 1 [cited 2022 Nov 16];45(1):45–53. Available from:  
26 632 <https://pubmed.ncbi.nlm.nih.gov/30259548/>  
27  
28  
29  
30  
31 633 47. Singogo C, Mweshi M, Rhoda A. Challenges experienced by mothers caring for  
32 634 children with cerebral palsy in Zambia. South African J Physiother [Internet]. 2015  
33 635 Apr 28 [cited 2022 Nov 16];71(1). Available from: [/pmc/articles/PMC6093109/](https://pubmed.ncbi.nlm.nih.gov/261093109/)  
34  
35  
36  
37 636 48. Priyadharishini J, Sadan V, Prashanth, Sebastian T. Community - Based intervention  
38 637 package on knowledge, attitude and selected skills of home care among primary care  
39 638 givers of children with cerebral palsy. Indian J Contin Nurs Educ [Internet]. 2017  
40 639 [cited 2022 Nov 16];18(2):46. Available from:  
41 640 [https://www.ijcne.org/article.asp?issn=2230-](https://www.ijcne.org/article.asp?issn=2230-7354;year=2017;volume=18;issue=2;spage=46;epage=50;aulast=Priyadharishini)  
42 641 [7354;year=2017;volume=18;issue=2;spage=46;epage=50;aulast=Priyadharishini](https://www.ijcne.org/article.asp?issn=2230-7354;year=2017;volume=18;issue=2;spage=46;epage=50;aulast=Priyadharishini)  
43  
44  
45  
46  
47  
48 642 49. Adams MS, Khan NZ, Begum SA, Wirz SL, Hesketh T, Pring TR. Feeding difficulties  
49 643 in children with cerebral palsy: low-cost caregiver training in Dhaka, Bangladesh.  
50 644 Child Care Health Dev [Internet]. 2012 Nov [cited 2022 Nov 16];38(6):878–88.  
51 645 Available from: <https://pubmed.ncbi.nlm.nih.gov/22082112/>  
52  
53  
54  
55  
56 646 50. NHS Scotland. The Charter of Patients Rights and Responsibilities | NHS inform  
57 647 [Internet]. 2022 [cited 2022 Nov 29]. Available from:  
58 648 <https://www.nhsinform.scot/care-support-and-rights/health-rights/patient-charter/the->



- 1  
2  
3 649 charter-of-patient-rights-and-responsibilities  
4  
5  
6 650 51. Norman ID, Kweku M, Awiah BM, Binka FN, Norman ID, Kweku M, et al. Patients'  
7 651 Access to Medical Records: Is It a Privilege or a Substantive Right? *Adv Appl Sociol*  
8 652 [Internet]. 2015 Dec 4 [cited 2022 Nov 29];5(12):291–8. Available from:  
9 653 [http://www.scirp.org/Html/1-2290290\\_61714.htm](http://www.scirp.org/Html/1-2290290_61714.htm)  
10  
11  
12  
13 654 52. Yarney L, Buabeng T, Baidoo D, Bawole JN. Operationalization of the Ghanaian  
14 655 Patients' Charter in a Peri-urban Public Hospital: Voices of Healthcare Workers and  
15 656 Patients. *Int J Heal Policy Manag* [Internet]. 2016 [cited 2022 Nov 29];5(9):525.  
16 657 Available from: </pmc/articles/PMC5010655/>  
17  
18  
19  
20  
21 658 53. Florin D, Dixon J. Public involvement in health care. *BMJ Br Med J* [Internet]. 2004  
22 659 Jan 1 [cited 2022 Nov 29];328(7432):159. Available from: </pmc/articles/PMC314519/>  
23  
24  
25 660 54. Gillies MB, Bowen JR, Patterson JA, Roberts CL, Torvaldsen S. Educational  
26 661 outcomes for children with cerebral palsy: a linked data cohort study. *Dev Med Child*  
27 662 *Neurol* [Internet]. 2018 Apr 1 [cited 2022 Nov 29];60(4):397–401. Available from:  
28 663 <https://pubmed.ncbi.nlm.nih.gov/29278268/>  
29  
30  
31  
32 664 55. Ministry of Education. Inclusive Education Policy | UNICEF Ghana [Internet]. 2015  
33 665 [cited 2022 Nov 29]. Available from: [https://www.unicef.org/ghana/reports/inclusive-](https://www.unicef.org/ghana/reports/inclusive-education-policy)  
34 666 [education-policy](https://www.unicef.org/ghana/reports/inclusive-education-policy)  
35  
36  
37  
38 667 56. Geere JL, Gona J, Omondi FO, Kifalu MK, Newton CR, Hartley S. Caring for children  
39 668 with physical disability in Kenya: potential links between caregiving and carers'  
40 669 physical health. *Child* [Internet]. 2013 May [cited 2022 Nov 16];39(3):381. Available  
41 670 from: </pmc/articles/PMC3654176/>  
42  
43  
44  
45  
46 671 57. Vanderpuye I. Piloting inclusive education in Ghana: parental perceptions,  
47 672 expectations and involvement. PhD thesis, University of Leeds. [Leeds]: University of  
48 673 Leeds; 2013.  
49  
50  
51  
52 674 58. Nuri RP, Aldersey HM, Ghahari S. Needs of families of children with cerebral palsy in  
53 675 Bangladesh: A qualitative study. *Child Care Health Dev* [Internet]. 2019 Jan 1 [cited  
54 676 2022 Nov 16];45(1):36–44. Available from:  
55 677 <https://pubmed.ncbi.nlm.nih.gov/30304759/>  
56  
57  
58  
59 678 59. Chiluba BC, Moyo G. Caring for a cerebral palsy child: a caregivers perspective at the  
60

- 1  
2  
3 679 University Teaching Hospital, Zambia. BMC Res Notes [Internet]. 2017 Dec 8 [cited  
4 2022 Nov 16];10(1). Available from: <https://pubmed.ncbi.nlm.nih.gov/29221493/>  
5 680  
6  
7 681 60. Akweongo P, Aikins M, Wyss K, Salari P, Tediosi F. Insured clients out-of-pocket  
8 payments for health care under the national health insurance scheme in Ghana. BMC  
9 682  
10 Health Serv Res [Internet]. 2021 Dec 1 [cited 2022 Nov 29];21(1):1–14. Available  
11 683  
12 from: [https://bmchealthservres.biomedcentral.com/articles/10.1186/s12913-021-](https://bmchealthservres.biomedcentral.com/articles/10.1186/s12913-021-06401-8)  
13 684  
14 685 06401-8  
15  
16  
17 686

Confidential: For Review Only

1  
2  
3  
4  
5  
6  
7  
8  
9  
10  
11  
12  
13  
14  
15  
16  
17  
18  
19  
20  
21  
22  
23  
24  
25  
26  
27  
28  
29  
30  
31  
32  
33  
34  
35  
36  
37  
38  
39  
40  
41  
42  
43  
44  
45  
46  
47  
48  
49  
50  
51  
52  
53  
54  
55  
56  
57  
58  
59  
60

Fig 1: Categories of challenges faced by caregivers.

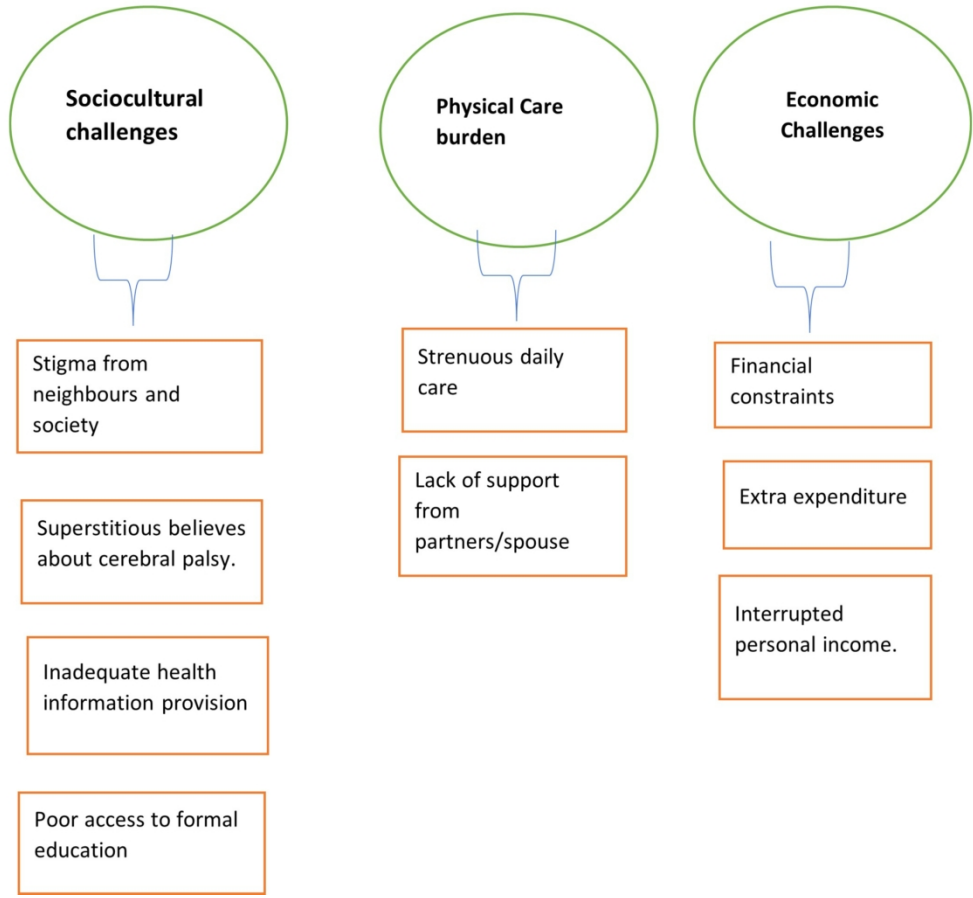

Categories of challenges

569x568mm (96 x 96 DPI)

## Supplementary File 1: Interview guide

| A. Demographic data child and caregiver |                                                                                                                                                                                                                                                                                                                                                     | Comment/ details |
|-----------------------------------------|-----------------------------------------------------------------------------------------------------------------------------------------------------------------------------------------------------------------------------------------------------------------------------------------------------------------------------------------------------|------------------|
|                                         | <ul style="list-style-type: none"> <li>• Relationship of caregiver to child</li> <li>• Age of caregiver</li> <li>• Educational level of caregiver</li> <li>• Occupation of Caregiver</li> <li>• Marital status of Caregiver</li> <li>• Age of child</li> <li>• Type of cerebral palsy</li> </ul>                                                    |                  |
|                                         | Interview guide                                                                                                                                                                                                                                                                                                                                     |                  |
|                                         | <p>1. Tell me about your experience of caring for a child with cerebral palsy?</p> <p>Probes: Ask probing questions base on response of each participant.</p> <p>2. Tell me about any challenges that you experience in your role as a caregiver.</p> <p>Probes: Ask probing question to explore details of challenges mentioned by caregivers.</p> |                  |

# BMJ Paediatrics Open

## Family caregivers experience of care with a child with cerebral palsy: the lived experiences and challenges of caregivers in a resource-limited setting in northern Ghana

|                               |                                                                                                                                                                                                                                                                                                                                                                                                                  |
|-------------------------------|------------------------------------------------------------------------------------------------------------------------------------------------------------------------------------------------------------------------------------------------------------------------------------------------------------------------------------------------------------------------------------------------------------------|
| Journal:                      | <i>BMJ Paediatrics Open</i>                                                                                                                                                                                                                                                                                                                                                                                      |
| Manuscript ID                 | bmjpo-2022-001807.R2                                                                                                                                                                                                                                                                                                                                                                                             |
| Article Type:                 | Original research                                                                                                                                                                                                                                                                                                                                                                                                |
| Date Submitted by the Author: | 09-May-2023                                                                                                                                                                                                                                                                                                                                                                                                      |
| Complete List of Authors:     | Mwinbam, Mavis Mallory; Nadowli District Hospital, Upper West Region, Ghana, Department of Nursing<br>Suglo, Joseph; Presbyterian University College, Department of Nursing and Midwifery<br>Nyarko Agyeman, Yaa; University for Development Studies, Department of Population and Reproductive Health<br>Kukeba, Margaret Wekem; C K Tedam University of Technology and Applied Sciences, Department of Nursing |
| Keywords:                     | Qualitative research, Rehabilitation                                                                                                                                                                                                                                                                                                                                                                             |
|                               |                                                                                                                                                                                                                                                                                                                                                                                                                  |

SCHOLARONE™  
Manuscripts



I, the Submitting Author has the right to grant and does grant on behalf of all authors of the Work (as defined in the below author licence), an exclusive licence and/or a non-exclusive licence for contributions from authors who are: i) UK Crown employees; ii) where BMJ has agreed a CC-BY licence shall apply, and/or iii) in accordance with the terms applicable for US Federal Government officers or employees acting as part of their official duties; on a worldwide, perpetual, irrevocable, royalty-free basis to BMJ Publishing Group Ltd ("BMJ") its licensees and where the relevant Journal is co-owned by BMJ to the co-owners of the Journal, to publish the Work in this journal and any other BMJ products and to exploit all rights, as set out in our [licence](#).

The Submitting Author accepts and understands that any supply made under these terms is made by BMJ to the Submitting Author unless you are acting as an employee on behalf of your employer or a postgraduate student of an affiliated institution which is paying any applicable article publishing charge ("APC") for Open Access articles. Where the Submitting Author wishes to make the Work available on an Open Access basis (and intends to pay the relevant APC), the terms of reuse of such Open Access shall be governed by a Creative Commons licence – details of these licences and which [Creative Commons](#) licence will apply to this Work are set out in our licence referred to above.

Other than as permitted in any relevant BMJ Author's Self Archiving Policies, I confirm this Work has not been accepted for publication elsewhere, is not being considered for publication elsewhere and does not duplicate material already published. I confirm all authors consent to publication of this Work and authorise the granting of this licence.

**Title:** Family caregivers experience of care with a child with cerebral palsy: the lived experiences and challenges of caregivers in a resource-limited setting in northern Ghana

**Authors:** Mavis Mallory Mwinbam<sup>1</sup>, Joseph Ngmenesegre Suglo<sup>2\*</sup>, Yaa Nyarko Agyeman<sup>3</sup>, Margaret Wekem Kukeba<sup>4</sup>

### **Institutional affiliations**

<sup>1</sup>Department of Nursing, Nadowli District Hospital, Upper West Region, Ghana

<sup>2</sup>Department of Nursing and Midwifery, Presbyterian University, Ghana.

<sup>3</sup>Department of Population and Reproductive Health, School of Public Health, University for Development Studies

<sup>4</sup>Department of Nursing, CK Tadam University of Technology and Applied Sciences

\*Correspondence: [suglojoseph@gmail.com](mailto:suglojoseph@gmail.com)

### **Credentials and occupation of Researchers**

<sup>1</sup>MPN - Paediatric Nurse Specialist; <sup>2</sup>PhD student - Lecturer; <sup>3</sup>PhD – Senior Lecturer; <sup>4</sup>PhD – Senior Lecturer

### **Abstract**

#### **Introduction**

Caring for a child with cerebral palsy may be more emotionally and physically exhausting than caring for a typical growing child. The task could be more challenging in resource-limited settings with insufficient support services. Family caregivers' perspective of this phenomenon needs exploring to facilitate the development of innovative services. The study explored the challenges family caregivers face with children with cerebral palsy in a resource-limited context in northern Ghana.

#### **Methods**

We conducted a qualitative study underpinned by phenomenological principles where it is believed that the reality of a phenomenon is tied to caregivers' experiences. In this study, we unearthed caregivers' experiences/challenges from their own perspective. The method of data analysis used was to allow the issues emerge from the data (Inductive process) using the content analysis approach. This analysis approach appears acceptable from the qualitative studies literature. We recruited 13 caregivers of children with cerebral palsy from the physiotherapy unit at Tamale teaching hospital, Ghana and conducted individual in-depth interviews supported by an open-ended topic guide. Interviews were audio recorded, transcribed, and translated and were then coded inductively prior to conducting a content analysis of the data when grouped into themes.

#### **Results**

Barriers that emerged from the data, to managing a child with cerebral palsy included those at the level of socio-cultural barriers (values, attitudes and belief systems within society), economic challenges with looking after a child as well as the immediate physical care burdens. Societal barriers included discrimination and isolation, lack of family and societal support with poor access to health information and formal education.

## 39 Conclusion

40 Caregivers have the arduous task of caring for a child with cerebral palsy. Social support interventions  
41 and policy initiatives that seek to ameliorate caregivers' finances and make formal education accessible  
42 to this marginalised child population may be beneficial in this study context.

### 43 What is already known on this topic:

- 44 • Caring for a child with cerebral palsy may impact on caregivers physical and  
45 psychological health.
- 46 • Children with cerebral palsy may have functional limitations and depend on others for  
47 assistance with daily living activities.
- 48 • How caregivers cope or adapt to caregiving responsibility vary and may depend on  
49 contextual factors.

### 50 What this study adds:

- 51 • Parents of children with cerebral palsy in Ghana describe experiences of social isolation  
52 and stigma within their communities.
- 53 • Caregivers of children with cerebral palsy in Tamale Hospital in Ghana perceive that  
54 they have limited information on the cause and course of the condition.
- 55 • Caregivers describe high levels of spending on health care as well as the loss of  
56 businesses and jobs.
- 57 • There is a need to tackle how to prevent stigma and social isolation for caregivers of  
58 children with cerebral palsy.
- 59 • Provision of better information for caregivers on the health-related issues, cause, and  
60 prognosis for children with cerebral palsy may enable parents to feel more empowered  
61 to help their children in the future.

### 62 How this study might affect research, practice, or policy:

- 63 • Pragmatic steps and policy initiatives that offset the cost of accessing health care  
64 services for children with cerebral palsy could be beneficial in this context.
- 65 • The relevant authorities should operationalise the already existing "all-inclusive  
66 educational policy" to make formal education accessible to children with cerebral palsy.
- 67 • The findings of this study should serve as foundational research for empirical studies  
68 that seeks to develop interventions for caregivers of children with cerebral palsy.



## 70 Introduction

71 Cerebral palsy (CP) is a lifetime physical disability due to non-progressive injuries to the  
72 immature or developing brain (1–3). The risk factors associated with developing CP occur  
73 before, during or after pregnancy and include but not limited to intrauterine hypoxia, premature  
74 rupture of membranes, placenta abnormalities, preterm or post-term birth, asphyxia, prolonged  
75 labour, infections, hypoglycaemia, intracranial haemorrhage and respiratory distress syndrome  
76 (4,5). CP is estimated to occur in approximately 2.11 per 1000 live births globally (6), affecting  
77 males more than females (7), with more living in resource-limited settings (5,8,9).

78 In the Ghanaian context, official statistics on the number of children with CP are lacking.  
79 However, Cerebral Palsy Africa (CPA) estimated that one child per 300 births has CP in  
80 Ghana (10). The effects of CP on the growing child range from permanent disorders in  
81 movement and posture to activity limitation. The motor disorders of CP are frequently  
82 accompanied by impaired cognition, communication, sensation, perception, behavioural  
83 abnormalities, seizure disorders, musculoskeletal problems or a combination of these features  
84 (11,12). The condition adversely affects children's daily living experiences and limits their  
85 self-care functions such as feeding, dressing, bathing, and mobility (13,14). Because of the  
86 functional limitations experienced, some children with CP depend on caregivers for  
87 assistance with daily activities, leading to long-term caregiving that far exceeds the usual  
88 needs of typically developing children (11,15,16). For some caregivers, provision of care can  
89 be a burdensome, daunting task that can impact on their physical and psychological well-  
90 being (11,17). This is often worse in resource-limited settings where infrastructural amenities,  
91 social support and health care systems are not adequately developed to ameliorate the plight  
92 of caregivers (11,18). This study was designed to evaluate the challenges faced by family  
93 caregivers of children with CP in a resource-limited context in northern Ghana. This will  
94 serve as a basis for developing context-relevant services and policy initiatives to better the  
95 lives of caregivers and their children with CP.

## 96 Methods

### 97 Design

98 Phenomenological research methods have been employed in underpinning this study as it aims to  
99 describe the lived experience of individuals caring for children with CP. The qualitative research design  
100 literature shows that phenomenological principles acknowledge people's ties with their physical,  
101 social, and emotional world (19–24), suggesting that truth about the reality of a phenomenon is

1  
2  
3 102 embodied in peoples lived experiences (20,24). Thus, whilst a descriptive qualitative approach could  
4  
5 103 equally be used to unearth the data required in this study to explain the experiences of carers of  
6  
7 104 children with cerebral palsy, the phenomenological approach fitted in better (19,22). Caregivers vary  
8  
9 105 in how they adapt to caregiving demands and the process is unique with a special meaning for the  
10  
11 106 individual involved (25). The study design adapted enabled us to account for the variability in  
12  
13 107 caregivers' interpretations of their experience of care (26).

## 14 108 **Participants and Setting**

15  
16 109 Thirteen family caregivers of children with CP participated in the study. We included  
17  
18 110 individuals who resided with and provided care daily for a child under 18 years of age,  
19  
20 111 diagnosed by a qualified medical doctor and confirmed in their medical records to have CP.  
21  
22 112 The recruitment of participants took place at the physiotherapy unit of the Tamale Teaching  
23  
24 113 Hospital, the only tertiary hospital in the northern region of Ghana. The hospital provides  
25  
26 114 specialist care and physiotherapy services for children with diverse needs, including CP. Most  
27  
28 115 of the inhabitants in this setting are Muslims, but they also practice and revere the traditional  
29  
30 116 African religion. Thus, they believe in their ancestors and supernatural powers which could  
31  
32 117 sometimes influence their perceptions about disease causation and management. Wholesale,  
33  
34 118 retail and agricultural activities are the main occupation in the area (27). The first author, a  
35  
36 119 female paediatric nurse specialist has an extensive knowledge of the study area through her  
37  
38 120 residency program. Anecdotal observations she made at this setting motivated the conduct of  
39  
40 121 the study. However, she had no prior relationship with study participant.

## 41 122 **Sampling and recruitment**

42  
43 123 We undertook a purposive non-probability sampling technique where we concluded once we  
44  
45 124 met data saturation (28,29). All participants were recruited during their routine physiotherapy  
46  
47 125 clinic appointment days. We observed COVID-19 protocols (maintaining social distancing,  
48  
49 126 wearing Personal Protective Equipment (PPE) such as a nose mask or face shield and using  
50  
51 127 hand sanitisers) during participant recruitment and data collection. We confirmed participants'  
52  
53 128 inclusion by checking diagnoses from children's hospital records with the help of a  
54  
55 129 physiotherapist to ensure that children had been duly diagnosed by a medical professional. We  
56  
57 130 introduced the study aims and informed potential participants that involvement in the study  
58  
59 131 was voluntary. Participants interested in joining the study were then provided further  
60  
132 information using the information sheet by the researcher. We guided participants who  
133 consented to participate in the research to sign/thumb print the consent form before  
134 commencing data collection.

## 135 Data collection

136 We gathered participants demographic information such as caregiver relationship with the  
137 child, educational level, child age, marital status, and caregiver occupation from all consenting  
138 participants. These characteristics were collected to add more context to the study findings as  
139 they could diversely influence caregivers' experience. However, experience were not used to  
140 select participants purposively. For pragmatic reasons and the challenges involved in bringing  
141 participants with different medical review dates together for focus group discussion, we  
142 conducted individual face-to-face interviews using an in-depth interview topic guide  
143 (supplementary file 1) developed by the researchers based on the study's objectives. Our topic  
144 guide provided open ended questions which were then probed based on the participant's  
145 response (30,31). These interviews were either conducted in English language or the native  
146 language (Dagbani) at the hospital clinic based on the preferences of participants. All  
147 interviews were audio recorded and lasted 35-50 minutes. We wrote additional field notes to  
148 cover the observations made on each interviewee, and these were considered during the  
149 analysis for contextual issues. We conducted most interviews in the local Dagbani language.  
150 We manually transcribed recorded audio of interviews with participants verbatim into  
151 electronic text on a computer, taking cognisance of non-verbal cues captured in the field notes.  
152 We translated audio records in the local language (Dagbani) into English back-to-back to  
153 ensure we did not lose the meaning and were cross-checked between researchers for validation.  
154 Translated verbatim transcripts were also verified by a bilingual expert not part of the research  
155 team to ensure accuracy (32).

## 156 Data analysis

157 Inductive content analysis, as described by Elo and colleagues (33), was used to analyse the  
158 data of this study. Content analysis is a systematic, replicable technique for compressing many  
159 words of text into fewer content categories based on explicit coding rules. Participants'  
160 transcripts were anonymised with letters and numbers such as 'P1'and 'P2'. All authors then  
161 read the transcripts repeatedly and compared samples with the interview audio files. We  
162 generated the codes inductively by highlighting critical ideas from the data. We then copied  
163 these codes and grouped them into subcategories based on their relationship. We further  
164 grouped subcategories with similar meanings to form categories. We reviewed and compared  
165 categories and subcategories with the code and the entire dataset to ensure that we captured the  
166 meaning of the entire dataset as presented by participants in the interviews.

## 167 **Ethical considerations**

168 We observed all relative ethical issues, including maintaining privacy and confidentiality,  
 169 upholding the autonomy of caregivers, occasioning voluntary involvement and obtaining  
 170 informed consent. We also involved a third party to assess our ethical conduct and provide  
 171 ethical clearance. We, therefore, obtained ethical approval from the Committee on Human  
 172 Research, Publication and Ethics (CHRPE) of Kwame Nkrumah University of Science and  
 173 Technology (KNUST), Ghana, with reference number CHRPE/AP/231/21 and the Department  
 174 of Research and Development of the Tamale Teaching Hospital with reference number  
 175 TTH/R&D/SR/039, who also provided administrative permission for the study setting.

## 176 **Findings**

177 All caregivers interviewed were women, 12 being biological parents to the child with CP. The  
 178 majority were middle-aged women aged 30-68 years, with a mean age of 39. Most of the  
 179 children (n = 10) were between 2-4 years old. Table 1 presents the detailed demographic  
 180 information of participants.

181 *Table 1: Demographic Characteristics of Participants*

| Demographics                       | Frequency (n) | Percentage (%) |
|------------------------------------|---------------|----------------|
| <b>Caregiver relationship</b>      |               |                |
| Mother                             | 12            | 92             |
| Grandmother                        | 1             | 8              |
| <b>Age of caregiver</b>            |               |                |
| 30-39                              | 10            | 76             |
| ≥ 40-49                            | 3             | 24             |
| <b>Mean age</b>                    | 39            |                |
| <b>Educational level caregiver</b> |               |                |
| Senior High School and below       | 4             | 31             |
| Tertiary                           | 6             | 46             |
| No formal education                | 3             | 23             |
| <b>Occupation of Caregiver</b>     |               |                |
| Trading                            | 5             | 38             |
| Nurse                              | 2             | 15             |
| Teacher                            | 1             | 8              |
| Environmental health officer       | 1             | 8              |
| Unemployed                         | 4             | 31             |

|                                        |    |    |
|----------------------------------------|----|----|
| <b>Marital status of the caregiver</b> |    |    |
| Married                                | 11 | 84 |
| Single                                 | 1  | 8  |
| Widow                                  | 1  | 8  |
| <b>Age of child with CP</b>            |    |    |
| <2 years                               | 2  | 15 |
| 2-4                                    | 10 | 77 |
| 5-7                                    | 1  | 8  |
| <b>Type of CP</b>                      |    |    |
| Spastic                                | 5  | 38 |
| Not stated                             | 8  | 62 |

182

183 The interview data generated findings that embodied caregivers' sociocultural issues,  
 184 accessibility to health information and formal education, physical care burden and economic  
 185 factors. These themes mirrored three constructs of the multidimensional model of caregiving  
 186 process and caregiver burden proposed by Raina and colleagues (25). Thus, the model's  
 187 constructs of "background/context", "caregiver strain" and "coping/supportive factors" were  
 188 represented in the interview data. Generally, the model comprises of constructs and factors that  
 189 facilitate the understanding of caregiving and processes affecting caregivers' health (25).  
 190 Guided by this framework our study findings are presented in Figure 1.

### 191 **Figure 1: Multidimensional experiences and challenges of caregivers**

192

#### 193 **Background/context factors**

194 The first domain, background/context relates more to the social and economic characteristics  
 195 of the setting where caregiving takes place. Our findings depicted contextual sociocultural  
 196 issues and economic status of caregivers impacting their caregiving experience as described in  
 197 subsequent sections.

#### 198 ***Sociocultural Challenges:***

199 The sociocultural issues pertain to society's cultural and intuitive beliefs about CP and its  
 200 impact on caregivers. Caregivers reported how the sociocultural viewpoint make society hostile  
 201 towards them, and challenging living with a child with CP. Salient challenges narrated by  
 202 caregivers included stigma and misconceptions about CP. For example, one caregiver of a 2-

203 year-old child with CP explained how attending social gatherings was a challenge due to the  
204 negative language used to describe her child as not human but animal:

205 *Whenever there is an 'occasion' (marriage, naming ceremonies and funerals), I do not*  
206 *go because of how they treat the child; I do not like it. People will just be calling her*  
207 *all sorts of names, saying she is not human, so I should not waste my time on her (p11,*  
208 *caregiver of a 2year old girl).*

209 Furthermore, one mother described her feeling like she was the subject of ridicule with the  
210 belief that some members of the community might even intentionally push her why her child  
211 is not walking:

212 *We are now laughing stock to most people, some people know what the child is going*  
213 *through, and they will see you and intentionally ask you, so your child is still not*  
214 *walking 'Penh'? Sometimes in a car like this, they do not even want you to sit closer to*  
215 *them, or the child should touch them... (P6 caregiver of a 2year boy).*

216 Other caregivers felt discrimination against their children was obvious which scare them from  
217 associating with others. Thus, the child and caregiver could not freely relate with others due to  
218 emotional trauma and stigmatisation from others. Such constraints encountered by caregivers  
219 observed in their sample narrations are as follows:

220 *As for discrimination, it exists. Some relatives do not allow their children closer to my*  
221 *child because they feel he is not normal (p5 caregiver of a 7year boy).*

222 A caregiver added that the challenges in caring for a child with CP in the community are  
223 compounded by community members believing that CP results from punishment from the gods,  
224 and others say children with CP are spirits. According to them, such claims provoke emotional  
225 pain. It also appears such perceptions compel caregivers to seek a cure and on whether the  
226 children were spirits.

227 *Others make insulting remarks like this your child is not a human being. We have even*  
228 *visited a shrine on several occasions because of that... They will give herbal*  
229 *preparation to bathing the child; if he is not human, he will die after bathing those*  
230 *herbs. But after bathing him, it is clear that he is not what they were thinking of (p3*  
231 *caregiver of a 4year, 9months boy)*

### 232 ***Economic status***

233 The caregivers in this study demonstrated in their submission that their sources of income were  
234 interrupted, and they had financial limitations in meeting the child's care needs. Having a child  
235 with CP means having an expenditure line inconsistent with routine household expenses, thus  
236 raising the cost of a family's budget. Most caregivers employed and unemployed, described  
237 their experience of having increased expenditures due to buying medications, assistive devices,

238 transportation costs, laboratory investigations, and food buying. The latter placed an extra  
 239 financial burden on caregivers who may not also receive financial support as there is no clear,  
 240 steady formal support for the vulnerable in Ghana. See the submission of some participants:

241 *...I am supposed to be coming for review once every week, but because of the cost of*  
 242 *transportation, I have made it once every two weeks (p6 caregiver of a 2year boy).*

243 *In this place (referring to the physio unit), I was told that health insurance would cover*  
 244 *some part and you would also pay the rest after ... sometimes. 'Hmmm'.... It is not easy*  
 245 *. . . I have even stopped the neurological consult because you have to pay for the*  
 246 *consultation and still buy the drugs. After all, the hospital does not always have them*  
 247 *(p10, caregiver of a 4year boy).*

248 Besides the increased expenditure, caregivers' economic situation was reportedly made worse  
 249 when they could no longer engage in income-earning activities. Participants' reports show  
 250 that the caregiving demands of their children led to abandoning their employments as they  
 251 could not combine the care of the child who is a full-time job with their income-generating  
 252 activities, as shown in the quotes from participants:

253 *I am no longer employed and cannot do any work again. I worked in a private hospital*  
 254 *before I gave birth, but now this child is like this. I have stopped my employment*  
 255 *because he has this problem (cerebral palsy) (p10, caregiver of a 4year boy).*

256 *I am no longer in business because I can't be holding him while preparing my local*  
 257 *drinks, and there is no one to help. Where will I be getting money for his care? (p3,*  
 258 *caregiver of a 4year, 9months boy).*

259 Many of the caregivers who were initially engaged in personal businesses for income had their  
 260 businesses collapse because they did not have time to continue trading. Other caregivers  
 261 stopped because of the stress of juggling childcare and business. Caregivers were then left to  
 262 deal with the effects of these income cuts and rising expenditures.

263

### 264 **Caregiver Strain Factors:**

265 The second domain of factors, caregiver strain, denotes caregiving demands and perception on  
 266 family centeredness of formal healthcare services. Some participants narratives generally reflected  
 267 the sheer physical care burden and inadequate formal health information as detailed below.

#### 268 ***Physical care burden***

269 Caregivers recounted the challenges with providing activities of daily living such as bathing,  
 270 dressing, and moving their child whilst maintaining their routine responsibilities to themselves  
 271 and other family members. They lamented about the exhausting nature of caring for a child with  
 272 CP. Due to the physical and neurological incapacities of the child, they depend exclusively on

1  
2  
3 273 their caregivers to meet all their needs. Most participants of this study experienced struggles in  
4  
5 274 meeting the demands of children's daily care. Caregivers' reports indicate that lifting and  
6  
7 275 moving their children were particularly challenging as it affected their wellbeing, as stated in  
8  
9 276 their narratives below:

10  
11 277 *I usually feel tired due to carrying him always. It is a problem lifting him. I sometimes*  
12  
13 278 *get some body pain due to carrying him because he will not sit, so I do all the time I am*  
14  
15 279 *carrying him. I pray he can walk someday. If not, he will be a burden while growing up*  
16  
17 280 *because I cannot carry him (p3, caregiver of a 4year, 9months boy).*

18  
19 281 *I feel so tired of caring for him because he has a younger sibling I have to cater. At his*  
20  
21 282 *age (7 years), he should have been able to bathe and move about, but I still have to do*  
22  
23 283 *it (p5, caregiver of a 7year boy).*

24  
25 284 Caregivers also expressed experiencing body pains and having to depend on pain medications  
26  
27 285 to relieve themselves due to strenuous nature of the care they provide for their child with CP.  
28  
29 286 Caregivers also commented that the care became more challenging as their child grew older.  
30  
31 287 As seen in the verbatim quotations below, the complains of body pains is associated with  
32  
33 288 having to lift and move the children, as they grow physically and increase in size and weight.

34  
35 289 *...she doesn't want anyone to carry her, only me...so every day I have to be taking pain*  
36  
37 290 *medications, now she has reduced in weight... at first, she was heavy so when you carry*  
38  
39 291 *her hmmm my waist. Sometimes when I am in the room I cry because of the pains (P11*  
40  
41 292 *caregiver of a 2years old girl).*

### 42 293 ***Inadequate health information:***

43  
44 294 The data show that caregivers felt that healthcare professionals did not give them enough  
45  
46 295 information to enable them to understand, cope and care for their children. The lack of health  
47  
48 296 information made some caregivers believe in the community's claims of such children being  
49  
50 297 spirits or animals. For instance, some participants suggested that even though health workers  
51  
52 298 took the history of their child's condition, the health workers failed to give them information  
53  
54 299 about the condition. Caregivers with English literacy who could surf the internet resorted to  
55  
56 300 finding information about their child's condition, as demonstrated below.

57  
58 301 *They asked me questions some time ago about the child's condition, which they wrote down,*  
59  
60 302 *but I have not been given any information regarding his condition since then... they only said*  
303  
304 *we should come to this place (referring to the physio unit) and do the exercise (p5, caregiver*  
of a 7year boy).

305  
306 305 Even though participants report show that the internet has helped them to understand their  
307  
308 306 child's condition better, finding information from the internet that is not censored could be  
309  
310 307 misleading as there are sources that may not be credible. Thus, a lack of adequate information  
311  
312 308 from health workers could compel caregivers to sources of information that are not helpful.



1  
2  
3 309 *At first, I did not know what was wrong with him because the doctors would not give*  
4 310 *me more information about this condition...Now I am beginning to understand because*  
5 311 *I browse the internet and read about it. . . (p6, caregiver of a 2year boy).*

### 312 **Coping/Supportive Factors**

313 The factors included in this third and final construct consist of social support, family function  
314 and accessibility to formal education. The social support comprises of the informal support  
315 from immediate family members, friends, neighbours, and the community, while function  
316 describes the extent to which the family function as a unit in supporting caregivers. The  
317 findings related to these are described further below.

#### 318 ***Inadequate support from social networks***

319 Some caregivers indicated that they received minimal or no support from family members and  
320 others in providing care for their child. Most caregivers expressed concerns that their children  
321 may be abandoned in the event of their absence as represented in the following statement:

322 *It is not easy to get someone to care for him, especially when I am not feeling well. I*  
323 *still have to manage and care for him because, the way he is, who will have time to take*  
324 *care of him? (p3, caregiver of a 4year, 9months boy).*

325 As shown in the demographics, most caregivers were females and mothers to the children.  
326 Although caregiving role is traditionally a woman's role, and thus consistent with the findings  
327 of this study, considering the additional care needs of the child with CP, it would be expected  
328 the caregivers received support, at least from their spouses. However, the statement below  
329 captures the experiences of most of the caregivers in terms of support from their spouses.

330 *With this one, my husband is not helping me care for him. Do you think I will try to give*  
331 *birth again? He does not mind us any longer. At least once in a while, he should also*  
332 *pick him, and I will also rest, but he doesn't. (p3, caregiver of a 4year, 9months boy)*

#### 333 ***Inadequate access to formal education***

334 Another challenge caregivers encountered was that they could not find a suitable school that  
335 would render quality education for their children. Some mothers felt their children would not  
336 be accepted into the mainstream schools due to their condition, and special schools were  
337 unavailable. Thus, all schools within reach of caregivers were not resourced to admit children  
338 with special needs like CP. Some community members who seem not to know the depth of the  
339 child schooling problem kept recommending that the child be taken to school. See the following  
340 expressions of participants.

1  
2  
3 341 *They said I should take her to school, but in our place, they will not admit her. They said she*  
4 342 *could not sit, and she could not walk... When you send her to these regular schools, they will*  
5 343 *not take her. Moreover, no school in our area trains such children (p11, caregiver of a 3year*  
6 344 *old girl).*  
7  
8

9 345

## 11 346 Discussion

12  
13  
14 347 Our findings show that caregivers in this context encounter sociocultural, physical, and  
15 348 economic challenges in caring for their children with CP. The study's findings resonate with  
16 349 existing evidence and signpost critical contextual and global issues that need consideration to  
17 350 develop support systems and relevant interventions. To support policy makers, practitioners,  
18 351 and researchers in the design of interventions, key findings of this study are discussed in three  
19 352 domains: (i) individual level issues (ii) community level and (iii) formal health care system  
20 353 (See figure 2). The study findings in these areas according to existing literature impact on  
21 354 caregivers' physical health, psychological health and general wellbeing (25,34–36).  
22  
23  
24  
25  
26  
27

### 28 355 **Figure 2: Contextual Framing of Caregivers experiences and challenges**

29 356

#### 30 357 **Individual level Issues**

31  
32  
33  
34 358 Our finding indicates that caregivers of children with CP faced physical care burdens and  
35 359 economic pressures. Due to muscle spasticity, weakness and uncoordinated motor control,  
36 360 children with CP rely mainly on their caregivers for physical care, irrespective of age (37).  
37 361 Although there are assistive devices for aiding in the care of sick individuals with  
38 362 neuromuscular inadequacies and self-care deficit (38), the caregivers in this study had to lift  
39 363 and move their children manually, without such devices, resulting in caregivers' altered  
40 364 wellbeing such as aches and pains sometimes requiring medical attention. Meanwhile, the  
41 365 wellbeing of caregivers is critical, considering that most children with CP depend solely on  
42 366 them for their care (39,40). Therefore, though it might be useful to solicit the support of social  
43 367 networks to assist primary caregivers, it might even be more beneficial for health professionals  
44 368 to assist caregivers in learning manual handling and body mechanics to empower them to safely  
45 369 lift and move children (41,42).  
46  
47  
48  
49  
50  
51  
52  
53  
54  
55

56 370 Also at the individual level was the income cuts and increased expenditures of caregivers and  
57 371 their families. The loss of jobs, businesses and increased health care expenditures consequence  
58 372 of caring for a child with CP necessitate the need for employers and policy makers to create a  
59  
60

373 more flexible work culture that allows caregivers to engage in income-generating activities to  
374 lessen their financial burden (43–45). Even though the economic challenges for caregivers in  
375 this study are unavoidable, considering that the setting is generally a deprived area, the absence  
376 or limited financial support could limit caregivers' ability to access health care such as  
377 rehabilitation services for the care of their child as reported in other studies (43). Specific to  
378 this study's setting and similar populations, it might be beneficial if the current cost-sharing  
379 system of the National Health Insurance Scheme (46) is re-evaluated to meet the health  
380 financing needs of this marginalise populations with CP.

### 381 **Community level**

382 Cerebral palsy is an old-age neurological condition with scientifically generated evidence on  
383 its course (4,5). Despite this, the relations of children with CP and caregivers misunderstand  
384 CP in many contexts, especially in settings with limited general literacy (47), leading to  
385 attribution of the condition to supernatural causes, such as punishment from the gods and  
386 witchcraft, as reported in this study and others (47,48). Children with CP in this context were  
387 perceived as being spirit children and punished by the gods. These perceptions were translated  
388 into the level of community engagement with the caregivers and the children. Existing evidence  
389 shows that beliefs on witchcraft and punishment by the gods lead to labelling, stigmatisation  
390 and discrimination against families and children with CP (48). Lack of support for caregivers  
391 resulting from stigma has been reported in the existing literature (12,17). This limited support  
392 could compound the innate challenges of having a child with special needs. Thus, society's  
393 understanding of CP is critical in reducing stigmatisation and discrimination against families  
394 with children with CP and the associated cyclical effect on the child and caregiver. It is  
395 therefore critical that health information on CP is intensified to ensure that communities  
396 understand the causes and course of CP, promoting empathy and involvement of support  
397 systems in providing care for the child to improve their quality of life.

398 Furthermore, existing evidence suggest that children with CP without cognitive impairment  
399 could benefit from formal education (49). Nevertheless, caregivers reported that one of their  
400 challenges was finding school placement for their children with CP. Although Ghana has an  
401 all-inclusive education policy (50), it thus appear most schools in this setting do not have the  
402 capacity in terms of human resources and space to admit children with CP. This situation  
403 resonates with other study findings in India and Kenya reporting lack of formal education

opportunities (45,51,52). This suggests the need to operationalise educational policies that makes formal education more accessible to all including children with CP.

### **Health System**

The study's findings suggest that primary caregivers received limited or no health information about their child's condition. Limited information on health issues and services is a global challenge (53–55). However, challenging settings such as Ghana, with limited economic independence, are worst in this regard (16,45,56–59). Anecdotal evidence from the study setting suggests that health professionals provide ad hoc health education to caregivers of children with CP and other disabilities, using medical terms that caregivers and their support systems may not understand. Yet, there is evidence that adequate caregiver knowledge may promote better care for children with CP (57,60). Indeed, the trend of breaching the gap in service users' understanding of health issues and contributing effectively to service provision is through deliberate efforts to ensure public participation (61). Therefore, to forestall the challenges communities encounter with their health management, conscious efforts must be made to utilise evidence such as that identified in this study and introduce appropriate interventions at every health service level.

Conclusively, though the study findings might not be generalisable, it raises issues related to child physical care, cultural perceptions, health information, and educational needs that must be translated into appropriate community, health system and individual level response.

**Funding statement:** This research received no specific grant from any funding agency in the public, commercial or not-for-profit sectors.

**Competing interests' statement:** No competing interests to declare.

**Author contribution:** MMM, YNA and MWK conceptualise the study, methodology, and literature review. MMM and JNS undertook the data collection, transcription, and analysis. YNA reviewed transcript compared with audios, JNS and MWK drafted the manuscript. MWK and MMM reviewed manuscript for intellectual content. All authors read and approved the final manuscript for publication.

**Data Availability:** All data relevant to the study are included in the article and its supplementary.

### **Patient and Public Involvement**

1  
2  
3 434 Patients or the public were not involved in the design, or conduct, or reporting, or dissemination  
4  
5 435 plans of our research.  
6

7 436 **References**  
8

- 9  
10 437 1. Rosenbaum P, Paneth N, Leviton A, Goldstein M, Bax M, Damiano D, et al. A report:  
11 438 the definition and classification of cerebral palsy April 2006 - PubMed. *Dev Med*  
12 439 *Child Neurol* [Internet]. 2007 [cited 2023 May 1];49(6):8–14. Available from:  
13 440 <https://pubmed.ncbi.nlm.nih.gov/17370477/>  
14  
15  
16  
17 441 2. KINSNER-OVASKAINEN A, LANZONI M. Surveillance of cerebral palsy in  
18 442 Europe: Development of the JRC-SCPE central database and public health indicators.  
19 443 2017 [cited 2023 May 1]; Available from:  
20 444 <https://publications.jrc.ec.europa.eu/repository/handle/JRC109418>  
21  
22  
23  
24  
25 445 3. Cans C. Surveillance of cerebral palsy in Europe: a collaboration of cerebral palsy  
26 446 surveys and registers. *Surveillance of Cerebral Palsy in Europe (SCPE)*. *Dev Med*  
27 447 *Child Neurol* [Internet]. 2000 [cited 2023 May 1];42(12):816–24. Available from:  
28 448 <https://pubmed.ncbi.nlm.nih.gov/11132255/>  
29  
30  
31  
32 449 4. McIntyre S, Taitz D, Keogh J, Goldsmith S, Badawi N, Blair E. A systematic review  
33 450 of risk factors for cerebral palsy in children born at term in developed countries. *Dev*  
34 451 *Med Child Neurol* [Internet]. 2013 Jun 1 [cited 2022 Nov 16];55(6):499–508.  
35 452 Available from: <https://onlinelibrary.wiley.com/doi/full/10.1111/dmcn.12017>  
36  
37  
38  
39  
40 453 5. Sellier E, Platt MJ, Andersen GL, Krägeloh-Mann I, De La Cruz J, Cans C, et al.  
41 454 Decreasing prevalence in cerebral palsy: a multi-site European population-based study,  
42 455 1980 to 2003. *Dev Med Child Neurol* [Internet]. 2016 Jan 1 [cited 2022 Nov  
43 456 16];58(1):85–92. Available from:  
44 457 <https://onlinelibrary.wiley.com/doi/full/10.1111/dmcn.12865>  
45  
46  
47  
48  
49 458 6. Oskoui M, Coutinho F, Dykeman J, Jetté N, Pringsheim T. An update on the  
50 459 prevalence of cerebral palsy: a systematic review and meta-analysis. *Dev Med Child*  
51 460 *Neurol* [Internet]. 2013 Jun [cited 2022 Nov 16];55(6):509–19. Available from:  
52 461 <https://pubmed.ncbi.nlm.nih.gov/23346889/>  
53  
54  
55  
56  
57 462 7. Chounti A, Hägglund G, Wagner P, Westbom L. Sex differences in cerebral palsy  
58 463 incidence and functional ability: a total population study. *Acta Paediatr* [Internet].  
59  
60

- 1  
2  
3 464 2013 [cited 2022 Nov 16];102(7):712–7. Available from:  
4  
5 465 <https://pubmed.ncbi.nlm.nih.gov/23551760/>  
6  
7 466 8. Dan B, Paneth N. Making sense of cerebral palsy prevalence in low-income countries.  
8  
9 467 *Lancet Glob Heal* [Internet]. 2017 Dec 1 [cited 2022 Nov 16];5(12):e1174–5.  
10  
11 468 Available from: <http://www.thelancet.com/article/S2214109X17304205/fulltext>  
12  
13 469 9. Van Naarden Braun K, Doernberg N, Schieve L, Christensen D, Goodman A, Yeargin-  
14  
15 470 Allsopp M. Birth Prevalence of Cerebral Palsy: A Population-Based Study. *Pediatrics*  
16  
17 471 [Internet]. 2016 Jan 1 [cited 2022 Oct 27];137(1). Available from:  
18  
19 472 <https://pubmed.ncbi.nlm.nih.gov/26659459/>  
20  
21 473 10. Kyeremateng JDA, Edusei A, Dogbe JA, Opoku MP, Nketsia W, Hammond C, et al.  
22  
23 474 Experiences of primary caregivers of children with cerebral palsy across the trajectory  
24  
25 475 of diagnoses in Ghana. *African J Disabil*. 2019;8.  
26  
27 476 11. Raina P, O'Donnell M, Rosenbaum P, Brehaut J, Walter SD, Russell D, et al. The  
28  
29 477 health and well-being of caregivers of children with cerebral palsy. *Pediatrics*  
30  
31 478 [Internet]. 2005 Jun [cited 2022 Oct 4];115(6). Available from:  
32  
33 479 <https://pubmed.ncbi.nlm.nih.gov/15930188/>  
34  
35 480 12. Majnemer A, Shevell M, Law M, Poulin C, Rosenbaum P. Indicators of distress in  
36  
37 481 families of children with cerebral palsy. *Disabil Rehabil* [Internet]. 2012 [cited 2022  
38  
39 482 Nov 16];34(14):1202–7. Available from: <https://pubmed.ncbi.nlm.nih.gov/22235883/>  
40  
41 483 13. Galpin J, Barratt P, Ashcroft E, Greathead S, Kenny L, Pellicano E. “The dots just  
42  
43 484 don’t join up”: Understanding the support needs of families of children on the autism  
44  
45 485 spectrum. *Autism* [Internet]. 2018 Jul 1 [cited 2022 Nov 16];22(5):571–84. Available  
46  
47 486 from: <https://pubmed.ncbi.nlm.nih.gov/28449587/>  
48  
49 487 14. Rajan AM, John R. Resilience and impact of children’s intellectual disability on Indian  
50  
51 488 parents. <https://doi.org/10.1177/1744629516654588> [Internet]. 2017 Feb 7 [cited 2022  
52  
53 489 Nov 16];21(4):315–24. Available from:  
54  
55 490 [https://journals.sagepub.com/doi/10.1177/1744629516654588?url\\_ver=Z39.88-](https://journals.sagepub.com/doi/10.1177/1744629516654588?url_ver=Z39.88-2003&rfr_id=ori%3Arid%3Acrossref.org&rfr_dat=cr_pub++0pubmed)  
56  
57 491 [2003&rfr\\_id=ori%3Arid%3Acrossref.org&rfr\\_dat=cr\\_pub++0pubmed](https://journals.sagepub.com/doi/10.1177/1744629516654588?url_ver=Z39.88-2003&rfr_id=ori%3Arid%3Acrossref.org&rfr_dat=cr_pub++0pubmed)  
58  
59 492 15. Romley JA, Shah AK, Chung PJ, Elliott MN, Vestal KD, Schuster MA. Family-  
60  
493 Provided Health Care for Children With Special Health Care Needs. *Pediatrics*

- 1  
2  
3 494 [Internet]. 2017 Jan 1 [cited 2022 Nov 16];139(1):e20161287–e20161287. Available  
4 from: <https://europepmc.org/article/med/28028202>  
5 495  
6  
7 496 16. Resch JA, Mireles G, Benz MR, Grenwelge C, Peterson R, Zhang D. Giving parents a  
8 voice: A qualitative study of the challenges experienced by parents of children with  
9 disabilities. *Rehabil Psychol* [Internet]. 2010 May [cited 2022 Nov 16];55(2):139–50.  
10 497  
11 498 Available from: /record/2010-09922-004  
12 499  
13  
14 500 17. Dambi JM, Jelsma J, Mlambo T. Caring for a child with Cerebral Palsy: The  
15 experience of Zimbabwean mothers. *African J Disabil* [Internet]. 2015 Aug 13 [cited  
16 501  
17 2022 Nov 16];4(1). Available from: /pmc/articles/PMC5433478/  
18 502  
19  
20 503 18. Hamzat THK, Mordi EL. Impact of caring for children with cerebral palsy on the  
21 general health of their caregivers in an African community. *Int J Rehabil Res*  
22 504  
23 [Internet]. 2007 Sep [cited 2022 Oct 4];30(3):191–4. Available from:  
24 505  
25 <https://pubmed.ncbi.nlm.nih.gov/17762763/>  
26 506  
27  
28 507 19. Alase A. The Interpretative Phenomenological Analysis (IPA): A Guide to a Good  
29 Qualitative Research Approach. *Int J Educ Lit Stud* [Internet]. 2017 Apr 30 [cited  
30 508  
31 2023 Mar 12];5(2):9–19. Available from:  
32 509  
33 <https://journals.aiac.org.au/index.php/IJELS/article/view/3400>  
34 510  
35  
36 511 20. Creswell JW, Poth CN. *Qualitative Inquiry & Research Design + 30 Essential Skills*  
37 for the Qualitative Researcher. sage [Internet]. 2017 [cited 2022 Oct 27];459.  
38 512  
39 Available from: <https://market.android.com/details?id=book-yMEKMQAACAAJ>  
40 513  
41  
42 514 21. Neubauer BE, Witkop CT, Varpio L. How phenomenology can help us learn from the  
43 experiences of others. *Perspect Med Educ* [Internet]. 2019 Apr 1 [cited 2023 Mar  
44 515  
45 12];8(2):90–7. Available from: <https://pubmed.ncbi.nlm.nih.gov/30953335/>  
46 516  
47  
48 517 22. Van Manen M. But Is It Phenomenology? <https://doi.org/10.1177/1049732317699570>  
49 518  
50 [Internet]. 2017 Mar 23 [cited 2023 Mar 12];27(6):775–9. Available from:  
51 519  
52 <https://journals.sagepub.com/doi/full/10.1177/1049732317699570>  
53  
54 520 23. van Manen M. *Researching lived experience: Human science for an action sensitive*  
55 521  
56 *pedagogy: Second Ed. Res Lived Exp Hum Sci an Action Sensitive Pedagog Second*  
57 522  
58 *Ed* [Internet]. 2016 Jun 16 [cited 2023 Mar 12];1–202. Available from:  
59 523  
60 <https://www.taylorfrancis.com/books/mono/10.4324/9781315421056/researching->

- 1  
2  
3 524 lived-experience-max-van-manen  
4  
5  
6 525 24. Spiegelberg H. Doing Phenomenology : Essays on and in Phenomenology. 2012 [cited  
7 526 2023 Mar 12];320. Available from:  
8  
9 527 [https://books.google.com/books/about/Doing\\_Phenomenology.html?id=BmUyBwAA](https://books.google.com/books/about/Doing_Phenomenology.html?id=BmUyBwAA)  
10 528 QBAJ  
11  
12  
13 529 25. Raina P, O'Donnell M, Schweltnus H, Rosenbaum P, King G, Brehaut J, et al.  
14 530 Caregiving process and caregiver burden: Conceptual models to guide research and  
15 531 practice. BMC Pediatr [Internet]. 2004 Jan 14 [cited 2023 Apr 30];4(1):1–13.  
16 532 Available from: <https://bmcpediatr.biomedcentral.com/articles/10.1186/1471-2431-4-1>  
17  
18  
19  
20 533 26. Lalvani P, Polvere L. Historical perspectives on studying families of children with  
21 534 disabilities: A case for critical research. Disabil Stud Q [Internet]. 2013 [cited 2023  
22 535 May 1];33(3). Available from: <https://dsq-sds.org/article/view/3209/3291>  
23  
24  
25  
26 536 27. Ghana Statistical Service. 2010 population & housing census : summary report of final  
27 537 results. Accra: Ghana Statistical Service; 2012.  
28  
29  
30 538 28. Dworkin SL. Sample Size Policy for Qualitative Studies Using In-Depth Interviews.  
31 539 Arch Sex Behav 2012 416 [Internet]. 2012 Sep 12 [cited 2022 Nov 16];41(6):1319–20.  
32 540 Available from: <https://link.springer.com/article/10.1007/s10508-012-0016-6>  
33  
34  
35  
36 541 29. Mason M. Sample Size and Saturation in PhD Studies Using Qualitative Interviews.  
37 542 Forum Qual Sozialforsch [Internet]. 2010 [cited 2022 Nov 16];11(3). Available from:  
38 543 [https://www.researchgate.net/publication/47408617\\_Sample\\_Size\\_and\\_Saturation\\_in\\_PhD\\_Studies\\_Using\\_Qualitative\\_Interviews](https://www.researchgate.net/publication/47408617_Sample_Size_and_Saturation_in_PhD_Studies_Using_Qualitative_Interviews)  
39 544  
40  
41  
42  
43 545 30. Stuckey H. The first step in Data Analysis: Transcribing and managing qualitative  
44 546 research data. J Soc Heal Diabetes. 2014 Jun;02(01):006–8.  
45  
46  
47  
48 547 31. Britten N. Qualitative interviews in healthcare. [Internet]. 2nd ed. Pope C, May N,  
49 548 editors. London: BMJ Books; 2006 [cited 2022 Jul 15]. 11–19 p. Available from:  
50 549 [https://scholar.google.com/scholar\\_lookup?title=Qualitative interviews in  
51 550 healthcare&pages=11-19&publication\\_year=1999&author=Britten%2CN](https://scholar.google.com/scholar_lookup?title=Qualitative+interviews+in+healthcare&pages=11-19&publication_year=1999&author=Britten%2CN)  
52  
53  
54  
55 551 32. Fossey E, Harvey C, McDermott F, Davidson L. Understanding and evaluating  
56 552 qualitative research. Aust N Z J Psychiatry [Internet]. 2002 Dec [cited 2022 Oct  
57 553 4];36(6):717–32. Available from: <https://pubmed.ncbi.nlm.nih.gov/12406114/>  
58  
59  
60



- 1  
2  
3 554 33. Elo S, Kyngäs H. The qualitative content analysis process. *J Adv Nurs* [Internet]. 2008  
4 555 Apr 1 [cited 2022 Oct 27];62(1):107–15. Available from:  
5 556 <https://onlinelibrary.wiley.com/doi/full/10.1111/j.1365-2648.2007.04569.x>  
6  
7  
8  
9 557 34. Wallander J, Varni J, Babani L, Banis H, DeHaan C, Wilcox K. Disability parameters,  
10 558 chronic strain, and adaptation of physically handicapped children and their mothers. *J*  
11 559 *Pediatr Psychol* [Internet]. 1989 [cited 2023 May 1];14(1):23–42. Available from:  
12 560 <https://academic.oup.com/jpepsy/article-abstract/14/1/23/973997>  
13  
14  
15  
16 561 35. King G, King S, Rosenbaum P, Goffin R. Family-centered caregiving and well-being  
17 562 of parents of children with disabilities: linking process with outcome. *J Pediatr Psychol*  
18 563 [Internet]. 1999 Feb 1 [cited 2023 May 1];24(1):41–53. Available from:  
19 564 <https://academic.oup.com/jpepsy/article/24/1/41/902577>  
20  
21  
22  
23  
24 565 36. Eicher PS, Batshaw ML. Cerebral palsy. *Pediatr Clin North Am* [Internet]. 1993 [cited  
25 566 2023 May 1];40(3):537–51. Available from:  
26 567 <https://pubmed.ncbi.nlm.nih.gov/8493064/>  
27  
28  
29  
30 568 37. Elangkovan IT, Shorey S. Experiences and Needs of Parents Caring for Children with  
31 569 Cerebral Palsy: A Systematic Review. *J Dev Behav Pediatr* [Internet]. 2020 Dec 1  
32 570 [cited 2022 Nov 28];41(9):730–9. Available from:  
33 571 <https://pubmed.ncbi.nlm.nih.gov/33136702/>  
34  
35  
36  
37 572 38. Patel DR, Neelakantan M, Pandher K, Merrick J. Cerebral palsy in children: a clinical  
38 573 overview. *Transl Pediatr* [Internet]. 2020 [cited 2022 Nov 28];9(Suppl 1):S125–35.  
39 574 Available from: <https://pubmed.ncbi.nlm.nih.gov/32206590/>  
40  
41  
42  
43 575 39. Gokcin Eminel A, Kahraman T, Genc A. Physical workload during caregiving  
44 576 activities and related factors among the caregivers of children with cerebral palsy. *Ir J*  
45 577 *Med Sci* [Internet]. 2021 May 1 [cited 2022 Nov 28];190(2):701–9. Available from:  
46 578 <https://pubmed.ncbi.nlm.nih.gov/32789552/>  
47  
48  
49  
50  
51 579 40. Grigger K. Cerebral palsy: an overview. . *Am Fam Physician* [Internet]. 2006 [cited  
52 580 2022 Nov 28];73:91–100. Available from:  
53 581 <https://www.google.com/search?q=KRIGGER%2C+K.+W.+2006.+Cerebral+palsy%3A+an+overview.+American+family+physician%2C+73%2C+91-100.&oq=KRIGGER%2C+K.+W.+2006.+Cerebral+palsy%3A+an+overview.+American+family+physician%2C+73%2C+91->  
54  
55  
56  
57  
58  
59  
60 584

- 1  
2  
3 585 100.&aqs=chrome..69i57.1052j0j7&sourceid=chrome&ie=UTF-8  
4  
5  
6 586 41. Asuquo EG, Tighe SM, Bradshaw C. Interventions to reduce work-related  
7 587 musculoskeletal disorders among healthcare staff in nursing homes; An integrative  
8 588 literature review. *Int J Nurs Stud Adv*. 2021 Nov 1;3:100033.
- 11 589 42. Prall J, Ross M. The management of work-related musculoskeletal injuries in an  
12 590 occupational health setting: the role of the physical therapist. *J Exerc Rehabil*  
13 591 [Internet]. 2019 Apr 1 [cited 2022 Nov 28];15(2):193. Available from:  
14 592 /pmc/articles/PMC6509454/
- 19 593 43. Nuri RP, Aldersey HM, Ghahari S. Needs of families of children with cerebral palsy in  
20 594 Bangladesh: A qualitative study. *Child Care Health Dev* [Internet]. 2019 Jan 1 [cited  
21 595 2022 Nov 16];45(1):36–44. Available from:  
22 596 <https://pubmed.ncbi.nlm.nih.gov/30304759/>
- 26 597 44. Chiluba BC, Moyo G. Caring for a cerebral palsy child: a caregivers perspective at the  
27 598 University Teaching Hospital, Zambia. *BMC Res Notes* [Internet]. 2017 Dec 8 [cited  
28 599 2022 Nov 16];10(1). Available from: <https://pubmed.ncbi.nlm.nih.gov/29221493/>
- 32 600 45. Vadivelan K, Sekar P, Sruthi SS, Gopichandran V. Burden of caregivers of children  
33 601 with cerebral palsy: An intersectional analysis of gender, poverty, stigma, and public  
34 602 policy. *BMC Public Health* [Internet]. 2020 May 8 [cited 2022 Nov 16];20(1):1–8.  
35 603 Available from: [https://bmcpublichealth.biomedcentral.com/articles/10.1186/s12889-](https://bmcpublichealth.biomedcentral.com/articles/10.1186/s12889-020-08808-0)  
36 604 [020-08808-0](https://bmcpublichealth.biomedcentral.com/articles/10.1186/s12889-020-08808-0)
- 41 605 46. Akweongo P, Aikins M, Wyss K, Salari P, Tediosi F. Insured clients out-of-pocket  
42 606 payments for health care under the national health insurance scheme in Ghana. *BMC*  
43 607 *Health Serv Res* [Internet]. 2021 Dec 1 [cited 2022 Nov 29];21(1):1–14. Available  
44 608 from: [https://bmchealthservres.biomedcentral.com/articles/10.1186/s12913-021-](https://bmchealthservres.biomedcentral.com/articles/10.1186/s12913-021-06401-8)  
45 609 [06401-8](https://bmchealthservres.biomedcentral.com/articles/10.1186/s12913-021-06401-8)
- 51 610 47. Baffoe M. Stigma, Discrimination & Marginalization: Gateways to Oppression of  
52 611 Persons with Disabilities in Ghana, West Africa, Michael Baffoe – WATHI. *Africa J*  
53 612 *Educ Soc Res* 3(1), 187-187 [Internet]. 2013 [cited 2022 Nov 16];3(1):187–187.  
54 613 Available from: [https://www.wathi.org/stigma-discrimination-marginalization-](https://www.wathi.org/stigma-discrimination-marginalization-gateways-to-oppression-of-persons-with-disabilities-in-ghana-west-africa-michael-baffoe/)  
55 614 [gateways-to-oppression-of-persons-with-disabilities-in-ghana-west-africa-michael-](https://www.wathi.org/stigma-discrimination-marginalization-gateways-to-oppression-of-persons-with-disabilities-in-ghana-west-africa-michael-baffoe/)  
56 615 [baffoe/](https://www.wathi.org/stigma-discrimination-marginalization-gateways-to-oppression-of-persons-with-disabilities-in-ghana-west-africa-michael-baffoe/)

- 1  
2  
3 616 48. Opoku MP, Peprah Opoku M, Alupo BA, Gyamfi N, Odame L, Mprah WK, et al. The  
4 617 Family and Disability in Ghana: Highlighting Gaps in Achieving Social Inclusion.  
5 618 Disabil CBR Incl Dev [Internet]. 2018 Mar 16 [cited 2022 Nov 16];28(4):41.  
6 619 Available from: <http://dcidj.org//articles/10.5463/dcid.v28i4.666/>
- 7  
8  
9  
10 620 49. Gillies MB, Bowen JR, Patterson JA, Roberts CL, Torvaldsen S. Educational  
11 621 outcomes for children with cerebral palsy: a linked data cohort study. *Dev Med Child*  
12 622 *Neurol* [Internet]. 2018 Apr 1 [cited 2022 Nov 29];60(4):397–401. Available from:  
13 623 <https://pubmed.ncbi.nlm.nih.gov/29278268/>
- 14  
15  
16 624 50. Ministry of Education. Inclusive Education Policy | UNICEF Ghana [Internet]. 2015  
17 625 [cited 2022 Nov 29]. Available from: [https://www.unicef.org/ghana/reports/inclusive-](https://www.unicef.org/ghana/reports/inclusive-education-policy)  
18 626 [education-policy](https://www.unicef.org/ghana/reports/inclusive-education-policy)
- 19  
20  
21  
22  
23  
24 627 51. Geere JL, Gona J, Omondi FO, Kifalu MK, Newton CR, Hartley S. Caring for children  
25 628 with physical disability in Kenya: potential links between caregiving and carers'  
26 629 physical health. *Child* [Internet]. 2013 May [cited 2022 Nov 16];39(3):381. Available  
27 630 from: [/pmc/articles/PMC3654176/](https://pubmed.ncbi.nlm.nih.gov/pmc/articles/PMC3654176/)
- 28  
29  
30  
31 631 52. Vanderpuye I. Piloting inclusive education in Ghana: parental perceptions,  
32 632 expectations and involvement. PhD thesis, University of Leeds. [Leeds]: University of  
33 633 Leeds; 2013.
- 34  
35  
36  
37 634 53. Clarke MA, Moore JL, Steege LM, Koopman RJ, Belden JL, Canfield SM, et al.  
38 635 Health information needs, sources, and barriers of primary care patients to achieve  
39 636 patient-centered care: A literature review. *Health Informatics J* [Internet]. 2016 Dec 1  
40 637 [cited 2022 Nov 29];22(4):992–1016. Available from:  
41 638 [https://journals.sagepub.com/doi/10.1177/1460458215602939?url\\_ver=Z39.88-](https://journals.sagepub.com/doi/10.1177/1460458215602939?url_ver=Z39.88-2003&rfr_id=ori%3Arid%3Acrossref.org&rfr_dat=cr_pub++0pubmed)  
42 639 [2003&rfr\\_id=ori%3Arid%3Acrossref.org&rfr\\_dat=cr\\_pub++0pubmed](https://journals.sagepub.com/doi/10.1177/1460458215602939?url_ver=Z39.88-2003&rfr_id=ori%3Arid%3Acrossref.org&rfr_dat=cr_pub++0pubmed)
- 43  
44  
45  
46  
47  
48 640 54. Budtz S, Witt K. Consulting the Internet before visit to general practice. Patients' use  
49 641 of the Internet and other sources of health information. *Scand J Prim Health Care*  
50 642 [Internet]. 2002 Sep [cited 2022 Nov 29];20(3):174–6. Available from:  
51 643 <https://pubmed.ncbi.nlm.nih.gov/12389756/>
- 52  
53  
54  
55  
56 644 55. Avery JC, Braunack-Mayer AJ. The information needs of women diagnosed with  
57 645 Polycystic Ovarian Syndrome--implications for treatment and health outcomes. *BMC*  
58 646 *Womens Health* [Internet]. 2007 Jun 20 [cited 2022 Nov 29];7. Available from:

- 1  
2  
3 647 <https://pubmed.ncbi.nlm.nih.gov/17578583/>  
4  
5  
6 648 56. Atakro CA, Atakro A, Aboagye JS, Blay AA, Addo SB, Agyare DF, et al. Older  
7 649 people's challenges and expectations of healthcare in Ghana: A qualitative study.  
8  
9 650 PLoS One [Internet]. 2021 Jan 1 [cited 2022 Nov 16];16(1):e0245451. Available from:  
10 651 <https://journals.plos.org/plosone/article?id=10.1371/journal.pone.0245451>  
12  
13 652 57. Zuurmond M, Nyante G, Baltussen M, Seeley J, Abanga J, Shakespeare T, et al. A  
14 653 support programme for caregivers of children with disabilities in Ghana:  
15 654 Understanding the impact on the wellbeing of caregivers. *Child Care Health Dev*  
16 655 [Internet]. 2019 Jan 1 [cited 2022 Nov 16];45(1):45–53. Available from:  
17 656 <https://pubmed.ncbi.nlm.nih.gov/30259548/>  
21  
22 657 58. Singogo C, Mweshi M, Rhoda A. Challenges experienced by mothers caring for  
23 658 children with cerebral palsy in Zambia. *South African J Physiother* [Internet]. 2015  
24 659 Apr 28 [cited 2022 Nov 16];71(1). Available from: [/pmc/articles/PMC6093109/](https://pubmed.ncbi.nlm.nih.gov/30259548/)  
27  
28 660 59. Priyadharishini J, Sadan V, Prashanth, Sebastian T. Community - Based intervention  
29 661 package on knowledge, attitude and selected skills of home care among primary care  
30 662 givers of children with cerebral palsy. *Indian J Contin Nurs Educ* [Internet]. 2017  
31 663 [cited 2022 Nov 16];18(2):46. Available from:  
32 664 [https://www.ijcne.org/article.asp?issn=2230-](https://www.ijcne.org/article.asp?issn=2230-7354;year=2017;volume=18;issue=2;spage=46;epage=50;aulast=Priyadharishini)  
33 665 [7354;year=2017;volume=18;issue=2;spage=46;epage=50;aulast=Priyadharishini](https://www.ijcne.org/article.asp?issn=2230-7354;year=2017;volume=18;issue=2;spage=46;epage=50;aulast=Priyadharishini)  
34  
35  
36  
37  
38  
39 666 60. Adams MS, Khan NZ, Begum SA, Wirz SL, Hesketh T, Pring TR. Feeding difficulties  
40 667 in children with cerebral palsy: low-cost caregiver training in Dhaka, Bangladesh.  
41 668 *Child Care Health Dev* [Internet]. 2012 Nov [cited 2022 Nov 16];38(6):878–88.  
42 669 Available from: <https://pubmed.ncbi.nlm.nih.gov/22082112/>  
43  
44  
45  
46  
47 670 61. Florin D, Dixon J. Public involvement in health care. *BMJ Br Med J* [Internet]. 2004  
48 671 Jan 1 [cited 2022 Nov 29];328(7432):159. Available from: [/pmc/articles/PMC314519/](https://pubmed.ncbi.nlm.nih.gov/22082112/)  
49  
50  
51 672

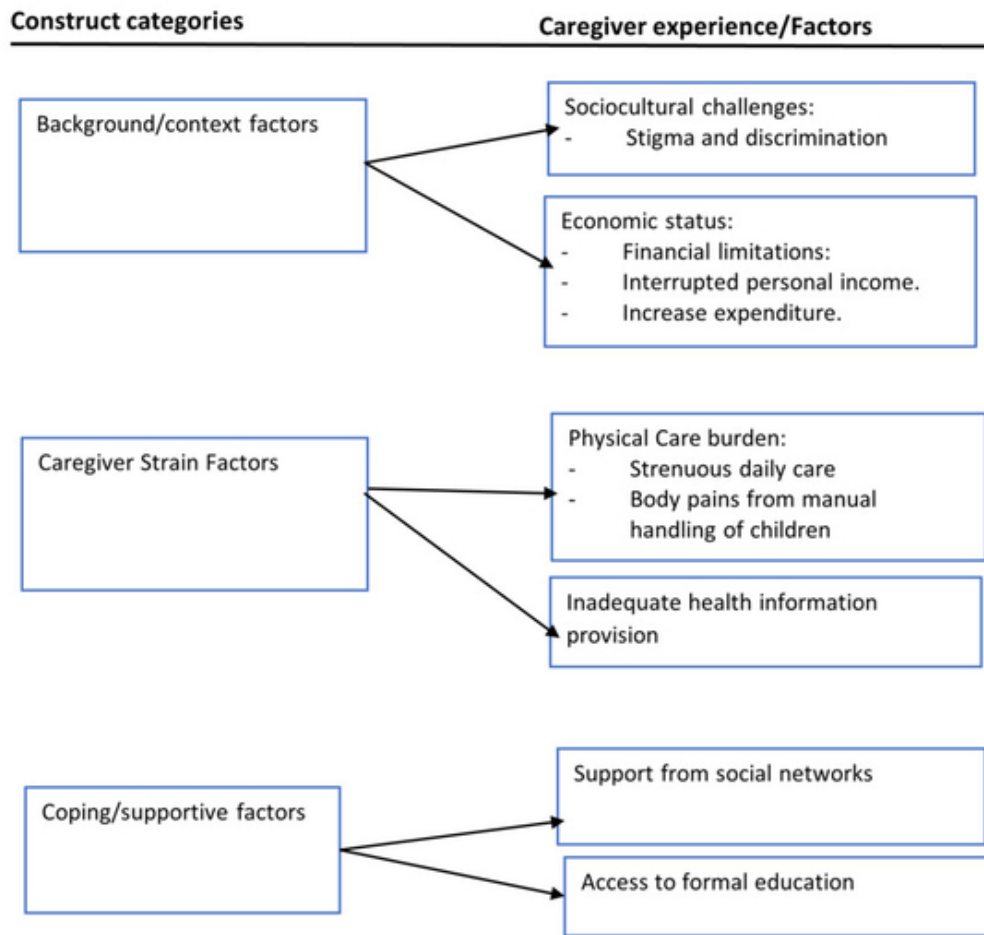

Multidimensional experiences and challenges of caregivers

45x43mm (300 x 300 DPI)

1  
2  
3  
4  
5  
6  
7  
8  
9  
10  
11  
12  
13  
14  
15  
16  
17  
18  
19  
20  
21  
22  
23  
24  
25  
26  
27  
28  
29  
30  
31  
32  
33  
34  
35  
36  
37  
38  
39  
40  
41  
42  
43  
44  
45  
46  
47  
48  
49  
50  
51  
52  
53  
54  
55  
56  
57  
58  
59  
60

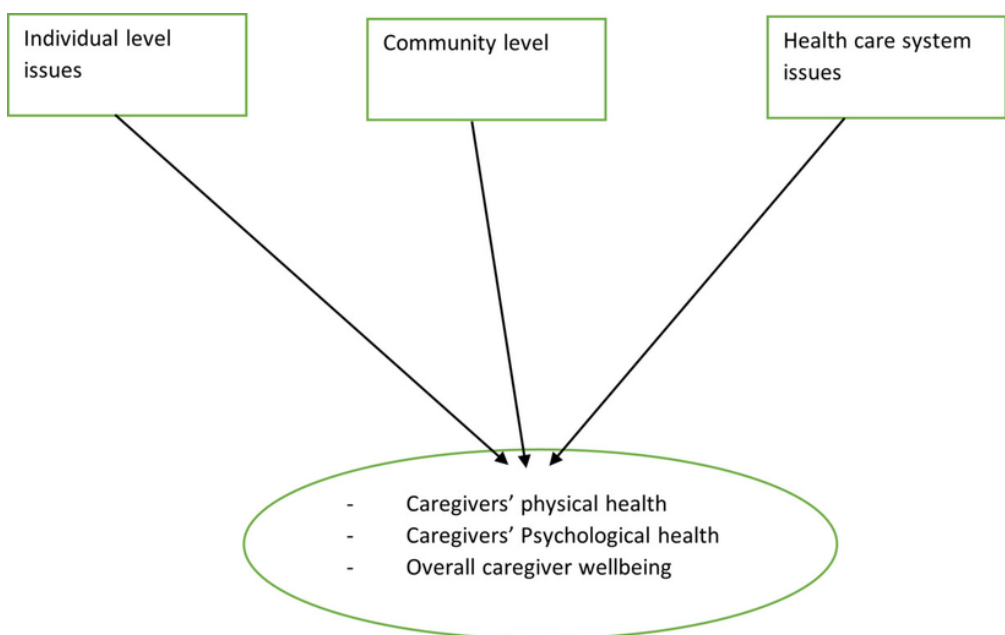

Contextual Framing of Caregivers experiences and challenges  
69x43mm (300 x 300 DPI)

## Supplementary File 1: Interview guide

| A. Demographic data child and caregiver |                                                                                                                                                                                                                                                                                                                                                     | Comment/ details |
|-----------------------------------------|-----------------------------------------------------------------------------------------------------------------------------------------------------------------------------------------------------------------------------------------------------------------------------------------------------------------------------------------------------|------------------|
|                                         | <ul style="list-style-type: none"> <li>• Relationship of caregiver to child</li> <li>• Age of caregiver</li> <li>• Educational level of caregiver</li> <li>• Occupation of Caregiver</li> <li>• Marital status of Caregiver</li> <li>• Age of child</li> <li>• Type of cerebral palsy</li> </ul>                                                    |                  |
|                                         | Interview guide                                                                                                                                                                                                                                                                                                                                     |                  |
|                                         | <p>1. Tell me about your experience of caring for a child with cerebral palsy?</p> <p>Probes: Ask probing questions base on response of each participant.</p> <p>2. Tell me about any challenges that you experience in your role as a caregiver.</p> <p>Probes: Ask probing question to explore details of challenges mentioned by caregivers.</p> |                  |

# BMJ Paediatrics Open

## Family caregivers experience of care with a child with cerebral palsy: the lived experiences and challenges of caregivers in a resource-limited setting in northern Ghana

|                               |                                                                                                                                                                                                                                                                                                                                                                                                                  |
|-------------------------------|------------------------------------------------------------------------------------------------------------------------------------------------------------------------------------------------------------------------------------------------------------------------------------------------------------------------------------------------------------------------------------------------------------------|
| Journal:                      | <i>BMJ Paediatrics Open</i>                                                                                                                                                                                                                                                                                                                                                                                      |
| Manuscript ID                 | bmjpo-2022-001807.R3                                                                                                                                                                                                                                                                                                                                                                                             |
| Article Type:                 | Original research                                                                                                                                                                                                                                                                                                                                                                                                |
| Date Submitted by the Author: | 10-Jun-2023                                                                                                                                                                                                                                                                                                                                                                                                      |
| Complete List of Authors:     | Mwinbam, Mavis Mallory; Nadowli District Hospital, Upper West Region, Ghana, Department of Nursing<br>Suglo, Joseph; Presbyterian University College, Department of Nursing and Midwifery<br>Nyarko Agyeman, Yaa; University for Development Studies, Department of Population and Reproductive Health<br>Kukeba, Margaret Wekem; C K Tedam University of Technology and Applied Sciences, Department of Nursing |
| Keywords:                     | Qualitative research, Rehabilitation                                                                                                                                                                                                                                                                                                                                                                             |
|                               |                                                                                                                                                                                                                                                                                                                                                                                                                  |

SCHOLARONE™  
Manuscripts





I, the Submitting Author has the right to grant and does grant on behalf of all authors of the Work (as defined in the below author licence), an exclusive licence and/or a non-exclusive licence for contributions from authors who are: i) UK Crown employees; ii) where BMJ has agreed a CC-BY licence shall apply, and/or iii) in accordance with the terms applicable for US Federal Government officers or employees acting as part of their official duties; on a worldwide, perpetual, irrevocable, royalty-free basis to BMJ Publishing Group Ltd ("BMJ") its licensees and where the relevant Journal is co-owned by BMJ to the co-owners of the Journal, to publish the Work in this journal and any other BMJ products and to exploit all rights, as set out in our [licence](#).

The Submitting Author accepts and understands that any supply made under these terms is made by BMJ to the Submitting Author unless you are acting as an employee on behalf of your employer or a postgraduate student of an affiliated institution which is paying any applicable article publishing charge ("APC") for Open Access articles. Where the Submitting Author wishes to make the Work available on an Open Access basis (and intends to pay the relevant APC), the terms of reuse of such Open Access shall be governed by a Creative Commons licence – details of these licences and which [Creative Commons](#) licence will apply to this Work are set out in our licence referred to above.

Other than as permitted in any relevant BMJ Author's Self Archiving Policies, I confirm this Work has not been accepted for publication elsewhere, is not being considered for publication elsewhere and does not duplicate material already published. I confirm all authors consent to publication of this Work and authorise the granting of this licence.

1  
2  
3 1 **Title:** Family caregivers experience of care with a child with cerebral palsy: the lived experiences and  
4 2 challenges of caregivers in a resource-limited setting in northern Ghana

5  
6 3 **Authors:** Mavis Mallory Mwinbam<sup>1</sup>, Joseph Ngmenesegre Suglo<sup>2\*</sup>, Yaa Nyarko Agyeman<sup>3</sup>, Margaret  
7 4 Wekem Kukeba<sup>4</sup>

8  
9 5 **Institutional affiliations**

10 6 <sup>1</sup>Department of Nursing, Nadowli District Hospital, Upper West Region, Ghana

11 7 <sup>2</sup>Department of Nursing and Midwifery, Presbyterian University, Ghana.

12 8 <sup>3</sup>Department of Population and Reproductive Health, School of Public Health, University for  
13 9 Development Studies

14 10 <sup>4</sup>Department of Nursing, CK Tadam University of Technology and Applied Sciences

15 11 \*Correspondence: [suglojoseph@gmail.com](mailto:suglojoseph@gmail.com)

16 12 **Credentials and occupation of Researchers**

17 13 <sup>1</sup>MPN - Paediatric Nurse Specialist; <sup>2</sup>PhD student - Lecturer; <sup>3</sup>PhD – Senior Lecturer; <sup>4</sup>PhD – Senior  
18 14 Lecturer

1  
2  
3 **17 Abstract**  
4

5  
6 **18 Introduction**  
7

8 19 Caring for a child with cerebral palsy may be more emotionally and physically exhausting than  
9  
10 20 caring for a typical growing child. The family caregivers' perspective of this phenomenon needs  
11  
12 21 exploring to facilitate the development of services. Our study explored the challenges family  
13  
14 22 caregivers face with children with cerebral palsy in a resource-limited context in northern  
15  
16 23 Ghana.

17  
18 **24 Methods**  
19

20 25 We conducted a qualitative study underpinned by phenomenological principles where it is  
21  
22 26 believed that the reality of a phenomenon is tied to caregivers' perspectives of their own  
23  
24 27 experiences. In this study, we unearthed caregivers' experiences/challenges from their own  
25  
26 28 perspectives. The method of data analysis used was to allow the issues to emerge from the data  
27  
28 29 (Inductive process) using the content analysis approach. We recruited 13 caregivers of children  
29  
30 30 with cerebral palsy from the physiotherapy unit at Tamale teaching hospital, and conducted  
31  
32 31 individual in-depth interviews supported by an open-ended topic guide. Interviews were audio  
33  
34 32 recorded, transcribed, and translated and coded inductively before conducting a content  
35  
36 33 analysis of the data when grouped into themes.

37  
38 **34 Results**  
39

40 35 We have identified barriers to managing a child with cerebral palsy, including; socio-cultural  
41  
42 36 barriers (values, attitudes and belief systems within society), economic challenges and  
43  
44 37 immediate physical care burdens. Specific barriers included; discrimination and isolation, lack  
45  
46 38 of family and societal support, with poor access to health information and formal education.  
47  
48 39 Others were lack of information on the cause and course of CP, caregivers' loss of jobs,  
49  
50 40 increased healthcare expenditure and struggles in lifting and moving children, which resonates  
51  
52 41 with evidence-based multidimensional model of caregiving process and caregiver burden.

53  
54 **51 Conclusion**  
55

56 43 Caregivers have the arduous task of caring for a child with cerebral palsy. Social support  
57  
58 44 interventions and policy initiatives that seek to ameliorate caregivers' finances and make formal  
59  
60 45 education accessible to this marginalised child population may be beneficial in this context.

1  
2  
3  
4  
5  
6  
7  
8  
9  
10  
11  
12  
13  
14  
15  
16  
17  
18  
19  
20  
21  
22  
23  
24  
25  
26  
27  
28  
29  
30  
31  
32  
33  
34  
35  
36  
37  
38  
39  
40  
41  
42  
43  
44  
45  
46  
47  
48  
49  
50  
51  
52  
53  
54  
55  
56  
57  
58  
59  
60  
61  
62  
63  
64  
65  
66  
67  
68  
69  
70  
71  
72  
73  
74  
75  
76  
77  
78  
79  
80

**What is already known on this topic:**

- Caring for a child with cerebral palsy may impact caregivers' physical and psychological health.
- Children with cerebral palsy may have functional limitations and depend on others for assistance with daily living activities.
- How caregivers cope or adapt to caregiving responsibility varies and may depend on contextual factors.

**What this study adds:**

- Parents of children with cerebral palsy in Ghana describe experiences of social isolation and stigma within their communities.
- Caregivers of children with cerebral palsy in Tamale Hospital in Ghana perceive that they have limited information on the cause and course of the condition.
- Caregivers describe high levels of spending on health care as well as the loss of businesses and jobs.
- There is a need to tackle how to prevent stigma and social isolation for caregivers of children with cerebral palsy.
- Provision of better information for caregivers on the health-related issues, cause, and prognosis for children with cerebral palsy may enable parents to feel more empowered to help their children in the future.

**How this study might affect research, practice, or policy:**

- Pragmatic steps and policy initiatives that offset the cost of accessing health care services for children with cerebral palsy could be beneficial in this context.
- The relevant authorities should operationalise the already existing "all-inclusive educational policy" to make formal education accessible to children with cerebral palsy.
- The findings of this study should serve as foundational research for empirical studies that seeks to develop interventions for caregivers of children with cerebral palsy.

## 74 Introduction

75 Cerebral palsy (CP) is a lifetime physical disability due to non-progressive injuries to the  
76 immature or developing brain (1–3) The risk factors associated with developing CP occur  
77 before, during or after pregnancy and include but not limited to intrauterine hypoxia, premature  
78 rupture of membranes, placenta abnormalities, preterm or post-term birth, asphyxia, prolonged  
79 labour, infections, hypoglycaemia, intracranial haemorrhage and respiratory distress syndrome  
80 (4,5). CP is estimated to occur in approximately 2.11 per 1000 live births globally (6), affecting  
81 males more than females (7), with more living in resource-limited settings (5,8,9).

82 In the Ghanaian context, official statistics on the number of children with CP are lacking.  
83 However, Cerebral Palsy Africa (CPA) estimated that one child per 300 births has CP in  
84 Ghana (10). CP causes permanent brain damage, limiting the child's ability to have full  
85 postural control, mobility and complete activities of daily living. The motor disorders of CP  
86 are frequently accompanied by impaired cognition, communication, sensation, perception,  
87 behavioural abnormalities, seizure disorders, musculoskeletal problems or a combination of  
88 these features (11,12). The condition adversely affects children's daily living experiences and  
89 limits their self-care functions such as feeding, dressing, bathing, and mobility (13,14).  
90 Because of the functional limitations experienced, some children with CP depend on  
91 caregivers for assistance with daily activities, leading to long-term caregiving that far exceeds  
92 the usual needs of typically developing children (12,15,16). For some caregivers, providing  
93 care can be a burdensome, daunting task impacting their physical and psychological well-  
94 being (12,17). This is often worse in resource-limited settings where infrastructural amenities,  
95 social support and health care systems are not adequately developed to ameliorate the plight  
96 of caregivers (12,18). This study was designed to evaluate the challenges family caregivers  
97 face of children with CP in a resource-limited context in northern Ghana. This will serve as a  
98 basis for developing context-relevant services and policy initiatives to better the lives of  
99 caregivers and their children with CP.

## 100 Methods

### 101 Design

102 Phenomenological research methods have been employed in underpinning this study as it aims  
103 to describe the lived experience of individuals caring for children with CP. The qualitative  
104 research design literature shows that phenomenological principles acknowledge people's ties  
105 with their physical, social, and emotional world (19–24), suggesting that truth about the reality  
106 of a phenomenon is embodied in people's lived experiences (20,24). Thus, whilst a descriptive

1  
2  
3 107 qualitative approach could equally be used to unearth the data required in this study to explain  
4 108 the experiences of carers of children with cerebral palsy, the phenomenological approach fitted  
5 109 in better (19,22). Caregivers vary in how they adapt to caregiving demands, and the process is  
6 110 unique with a special meaning for the individual involved (25). The study design adapted  
7 111 enabled us to account for the variability in caregivers' interpretations of their experience of  
8 112 care (26).

### 113 **Participants and Setting**

114 Thirteen family caregivers of children with CP participated in the study. We included  
115 individuals who resided with and provided care daily for a child under 18 years of age,  
116 diagnosed by a qualified medical doctor and confirmed in their medical records to have CP.  
117 The recruitment of participants took place at the physiotherapy unit of the Tamale Teaching  
118 Hospital, the only tertiary hospital in the northern region of Ghana. The hospital provides  
119 specialist care and physiotherapy services for children with diverse needs, including CP. Most  
120 of the inhabitants in this setting are Muslims, but they also practice and revere the traditional  
121 African religion. Thus, they believe in their ancestors and supernatural powers which could  
122 sometimes influence their perceptions about disease causation and management. Wholesale,  
123 retail and agricultural activities are the main occupation in the area (27). The first author, a  
124 female paediatric nurse specialist has an extensive knowledge of the study area through her  
125 residency program. Anecdotal observations she made at this setting motivated the conduct of  
126 the study. However, she had no prior relationship with study participant.

### 127 **Sampling and recruitment**

128 We utilised a purposive (non-probability) sampling technique to identify and recruit  
129 participants. Once we met data saturation, we did not recruit further participants (28,29). All  
130 participants were recruited during their routine physiotherapy clinic appointment days. We  
131 observed COVID-19 protocols (maintaining social distancing, wearing Personal Protective  
132 Equipment (PPE) such as a nose mask or face shield and using hand sanitisers) during  
133 participant recruitment and data collection. We confirmed participants' inclusion by checking  
134 diagnoses from children's hospital records with the help of a physiotherapist to ensure that a  
135 medical professional had duly diagnosed children. We introduced the study aims and informed  
136 potential participants that involvement in the study was voluntary. Participants interested in  
137 joining the study were then provided further information using the information sheet by the  
138 researcher. Participants who consented then signed or printed their thumbprint on the consent  
139 form prior to data collection.

### 140 **Data collection**

141 We gathered participants' demographic information such as caregiver relationship with the  
142 child, educational level, child age, marital status, and caregiver occupation from all consenting  
143 participants. These characteristics were collected to add more context to the study findings as  
144 they could diversely influence caregivers' experience. For pragmatic reasons and the challenges  
145 involved in bringing participants with different medical review dates together for focus group  
146 discussion, we conducted individual face-to-face interviews using an in-depth interview topic  
147 guide (supplementary file 1) developed by the researchers based on the study's objectives. Our  
148 topic guide provided open-ended questions which were then probed based on the participant's  
149 responses (30,31). These interviews were either conducted in English language or the native  
150 language (Dagbani) at the hospital clinic based on the preferences of participants. All  
151 interviews were audio recorded and lasted 35-50 minutes. We wrote additional field notes to  
152 cover the observations made on each interviewee, and these were considered during the  
153 analysis for contextual issues. We conducted most interviews in the local Dagbani language.  
154 We manually transcribed recorded audio of interviews with participants verbatim into  
155 electronic text on a computer, taking cognisance of non-verbal cues captured in the field notes.  
156 We translated audio records in the local language (Dagbani) into English back-to-back to  
157 ensure we did not lose the meaning and were cross-checked between researchers for validation.  
158 Translated verbatim transcripts were also verified by a bilingual expert not part of the research  
159 team to ensure accuracy (32).

### 160 **Data analysis**

161 Inductive content analysis, as described by Elo and colleagues (33), was used to analyse the  
162 data of this study. Content analysis is a systematic, replicable technique for compressing many  
163 words of text into fewer content categories based on explicit coding rules. Participants'  
164 transcripts were anonymised with letters and numbers such as 'P1' and 'P2'. All authors then  
165 read the transcripts repeatedly and compared samples with the interview audio files. We  
166 generated the codes inductively by highlighting critical ideas from the data. We then copied  
167 these codes and grouped them into subcategories based on their relationship. We further  
168 grouped subcategories with similar meanings to form categories. We reviewed and compared  
169 categories and subcategories with the code and the entire dataset to ensure that we captured the  
170 meaning of the entire dataset as presented by participants in the interviews.

## 171 Ethical considerations

172 We observed all relative ethical issues, including maintaining privacy and confidentiality,  
 173 upholding the autonomy of caregivers, occasioning voluntary involvement and obtaining  
 174 informed consent. We also involved a third party to assess our ethical conduct and provide  
 175 ethical clearance. We, therefore, obtained ethical approval from the Committee on Human  
 176 Research, Publication and Ethics (CHRPE) of Kwame Nkrumah University of Science and  
 177 Technology (KNUST), Ghana, with reference number CHRPE/AP/231/21 and the Department  
 178 of Research and Development of the Tamale Teaching Hospital with reference number  
 179 TTH/R&D/SR/039, who also provided administrative permission for the study setting.

## 180 Findings

181 All caregivers interviewed were women, 12 being biological parents to the child with CP. The  
 182 majority were middle-aged women aged 30-68 years, with a mean age of 39. Most of the  
 183 children (n = 10) were between 2-4 years old. Table 1 presents the detailed demographic  
 184 information of participants.

185 *Table 1: Demographic Characteristics of Participants*

| Demographics                       | Frequency - n (%) |
|------------------------------------|-------------------|
| <b>Caregiver relationship</b>      | N = 13            |
| Mother                             | 12 (92)           |
| Grandmother                        | 1 (8)             |
| <b>Age of caregiver</b>            | N = 13            |
| 30-39                              | 10 (76)           |
| ≥ 40-49                            | 3 (24)            |
| <b>Mean age</b>                    | 39                |
| <b>Educational level caregiver</b> | N = 13            |
| Senior High School and below       | 4 (31)            |
| Tertiary                           | 6 (46)            |
| No formal education                | 3 (23)            |
| <b>Occupation of Caregiver</b>     | N = 13            |
| Trading                            | 5 (38)            |
| Nurse                              | 2 (15)            |
| Teacher                            | 1 (8)             |



|                                        |         |
|----------------------------------------|---------|
| Environmental health officer           | 1 (8)   |
| Unemployed                             | 4 (31)  |
| <b>Marital status of the caregiver</b> | N = 13  |
| Married                                | 11 (84) |
| Single                                 | 1 (8)   |
| Widow                                  | 1 (8)   |
| <b>Age of child with CP</b>            | N = 13  |
| <2 years                               | 2 (15)  |
| 2-4                                    | 10 (77) |
| 5-7                                    | 1 (8)   |
| <b>Type of CP</b>                      | N = 13  |
| Spastic                                | 5 (38)  |
| Not stated                             | 8 (62)  |

186

187 The interview data generated findings that embodied caregivers' sociocultural issues,  
 188 accessibility to health information and formal education, physical care burden and economic  
 189 factors. These themes mirrored three constructs of the multidimensional model of caregiving  
 190 process and caregiver burden proposed by Raina and colleagues (25). Thus, the model's  
 191 constructs of "background/context", "caregiver strain" and "coping/supportive factors" were  
 192 represented in the interview data. Generally, the model comprises of constructs and factors that  
 193 facilitate the understanding of caregiving and processes affecting caregivers' health (25).  
 194 Guided by this framework our study findings are presented in Figure 1.

### 195 **Figure 1: Multidimensional experiences and challenges of caregivers**

196

#### 197 **Background/context factors**

198 The first domain, background/context relates more to the social and economic characteristics  
 199 of the setting where caregiving takes place. Our findings depicted contextual sociocultural  
 200 issues and economic status of caregivers impacting their caregiving experience as described in  
 201 subsequent sections.

202

1  
2  
3 203 ***Sociocultural Challenges:***  
4

5 204 The sociocultural issues pertain to society's cultural and intuitive beliefs about CP and its  
6  
7 205 impact on caregivers. Caregivers reported how they perceived that individuals within society  
8  
9 206 were often hostile to them, challenging their ability to live with their children with CP. In  
10  
11 207 particular, caregivers mentioned how other members within their community often stigmatised  
12  
13 208 them and had misconceptions about CP, including how it might have been caused. For example,  
14  
15 209 one caregiver of a 2-year-old child with CP explained how attending social gatherings was a  
16  
17 210 challenge due to the negative language used to describe her child as not human but animal:

18 211 *Whenever there is an 'occasion' (marriage, naming ceremonies and funerals), I do not*  
19 212 *go because of how they treat the child; I do not like it. People will just be calling her*  
20 213 *all sorts of names, saying she is not human, so I should not waste my time on her (p11,*  
21 214 *caregiver of a 2year old girl).*

23 215 One mother enunciated how she felt the subject of ridicule - describing how she believed that  
24 216 some members of the community intentionally questioned her on things they knew her child  
25 217 could not do.” Furthermore, this same mother recounted how she and her child were even seen  
26 218 as having something that might be “caught” or infectious with others purposely not sitting near  
27 219 her on public transport:

30 220 *We are now laughing stock to most people, some people know what the child is going*  
31 221 *through, and they will see you and intentionally ask you, so your child is still not*  
32 222 *walking 'Penh'? Sometimes in a car like this, they do not even want you to sit closer to*  
33 223 *them, or the child should touch them... (P6 caregiver of a 2year boy).*

36 224 Similarly, some caregivers mentioned how they felt discriminated against even by their  
37 225 relatives who would not allow their own children to interact with a child with a disability in  
38 226 case it might be infectious. Thus, the child and caregiver could not freely relate with others due  
39 227 to emotional trauma and stigmatisation from others. Such constraints encountered by  
40 228 caregivers observed in their sample narrations are as follows:

45 229 *As for discrimination, it exists. Some relatives do not allow their children closer to my*  
46 230 *child because they feel he is not normal (p5 caregiver of a 7year boy).*

48 231 It was shocking to hear that one caregiver even described how much community members  
49 232 stigmatised children with CP – believing that CP results as a punishment from “the Gods” and  
50 233 furthermore, that children with CP are “spirits and not human. This emerged in caregiver’s  
51 234 verbatim as emotionally very painful, leading some caregivers to seek cures through traditional  
52 235 healers to better understand whether their children were “spirits” or “possessed”.

57 236 *Others make insulting remarks like this your child is not a human being. We have even*  
58 237 *visited a shrine on several occasions because of that... They will give herbal*  
59 238 *preparation to bathing the child; if he is not human, he will die after bathing those*

239 *herbs. But after bathing him, it is clear that he is not what they were thinking of (p3*  
240 *caregiver of a 4year, 9months boy)*

### 241 ***Economic status***

242 The caregivers in this study described through their interviews that their sources of income  
243 were interrupted, and they had financial limitations in meeting the child's care needs. Having a  
244 child with CP means having an expenditure line inconsistent with routine household expenses,  
245 thus raising the cost of a family's budget. Most caregivers employed and unemployed,  
246 described their experience of having increased expenditures due to buying medications,  
247 assistive devices, transportation costs, laboratory investigations, and food buying. The latter  
248 placed an extra financial burden on caregivers who may not also receive financial support as  
249 there is no clear, steady formal support for the vulnerable in Ghana. An example of experiences  
250 that were enunciated by caregivers include:

251 *...I am supposed to be coming for review once every week, but because of the cost of*  
252 *transportation, I have made it once every two weeks (p6 caregiver of a 2year boy).*

253 *In this place (referring to the physio unit), I was told that health insurance would cover*  
254 *some part and you would also pay the rest after ... sometimes. 'Hmmm'.... It is not easy*  
255 *. . . I have even stopped the neurological consult because you have to pay for the*  
256 *consultation and still buy the drugs. After all, the hospital does not always have them*  
257 *(p10, caregiver of a 4year boy).*

258 Besides the increased expenditure, caregivers' economic situation was reportedly worsened  
259 when they could no longer engage in income-earning activities. Participants' reports show  
260 that the caregiving demands of their children led to abandoning their employment as they  
261 could not combine the care of the child who is a full-time job with their income-generating  
262 activities, as shown in the quotes from participants:

263 *I am no longer employed and cannot do any work again. I worked in a private hospital*  
264 *before I gave birth, but now this child is like this. I have stopped my employment*  
265 *because he has this problem (cerebral palsy) (p10, caregiver of a 4year boy).*

266 *I am no longer in business because I can't be holding him while preparing my local*  
267 *drinks, and there is no one to help. Where will I be getting money for his care? (p3,*  
268 *caregiver of a 4year, 9months boy).*

269 Many of the caregivers who were initially engaged in personal businesses for income had their  
270 businesses collapse because they did not have time to continue trading. Other caregivers  
271 stopped because of the stress of juggling childcare and business. Caregivers were then left to  
272 deal with the effects of these income cuts and rising expenditures.

273

1  
2  
3 274 **Caregiver Strain Factors:**  
4

5 275 The second domain of factors, caregiver strain, denotes caregiving demands and perception  
6  
7 276 of family centeredness of formal healthcare services. Some participants narratives generally  
8  
9 277 reflected the sheer physical care burden and inadequate formal health information, as detailed  
10  
11 278 below.

12  
13 279 ***Physical care burden***

14 280 Caregivers recounted the challenges with providing activities of daily living such as bathing,  
15  
16 281 dressing, and moving their child whilst maintaining their routine responsibilities to themselves  
17  
18 282 and other family members. They lamented about the exhausting nature of caring for a child with  
19  
20 283 CP. Due to the physical and neurological incapacities of the child, they depend exclusively on  
21  
22 284 their caregivers to meet all their needs. Most participants of this study experienced struggles in  
23  
24 285 meeting the demands of children's daily care. Caregivers' reports indicate that lifting and  
25  
26 286 moving their children were particularly challenging as it affected their wellbeing, as stated in  
27  
28 287 their narratives below:

29 288 *I usually feel tired due to carrying him always. It is a problem lifting him. I sometimes*  
30  
31 289 *get some body pain due to carrying him because he will not sit, so I do all the time I am*  
32  
33 290 *carrying him. I pray he can walk someday. If not, he will be a burden while growing up*  
34  
35 291 *because I cannot carry him (p3, caregiver of a 4year, 9months boy).*

36  
37 292 *I feel so tired of caring for him because he has a younger sibling I have to cater. At his*  
38  
39 293 *age (7 years), he should have been able to bathe and move about, but I still have to do*  
40  
41 294 *it (p5, caregiver of a 7year boy).*

42 295 Caregivers expressed how they often experienced body pains - depending on medications to  
43  
44 296 relieve the pain from the strenuous nature of the care they provide for their child with CP.  
45  
46 297 Caregivers also commented that care became more challenging as their children grew older  
47  
48 298 and particularly mentioned how body pains were related to having to lift and move the children  
49  
50 299 manually.

51 300 *...she doesn't want anyone to carry her, only me...so every day I have to be taking pain*  
52  
53 301 *medications, now she has reduced in weight... at first, she was heavy so when you carry her*  
54  
55 302 *hmmm my waist. Sometimes when I am in the room I cry because of the pains (P11 caregiver*  
56  
57 303 *of a 2years old girl).*

58 304 ***Inadequate health information:***

59 305 The data show that caregivers felt that healthcare professionals did not give them enough  
60  
61 306 information to enable them to understand, cope and care for their children. The lack of health

1  
2  
3 307 information made some caregivers believe in the community's claims of such children being  
4  
5 308 spirits or animals. For instance, some participants suggested that even though health workers  
6  
7 309 took the history of their child's condition, they failed to give them information about the  
8  
9 310 condition. Caregivers with English literacy who could surf the internet resorted to finding  
10  
11 311 information about their child's condition, as demonstrated below.

12  
13 312 *They asked me questions some time ago about the child's condition, which they wrote down,*  
14 313 *but I have not been given any information regarding his condition since then... they only said*  
15 314 *we should come to this place (referring to the physio unit) and do the exercise (p5, caregiver*  
16 315 *of a 7year boy).*

17  
18 316 Even though participants reported that the internet helped them to understand their child's  
19  
20 317 condition, finding information from the internet that is not censored could be misleading as  
21  
22 318 there are sources that may not be credible. Thus, a lack of adequate information from health  
23  
24 319 workers could compel caregivers to sources of information that are not helpful.

25  
26 320 *At first, I did not know what was wrong with him because the doctors would not give*  
27 321 *me more information about this condition...Now I am beginning to understand because*  
28 322 *I browse the internet and read about it. . . . (p6, caregiver of a 2year boy).*

### 30 323 **Coping/Supportive Factors**

31  
32 324 The factors included in this third and final construct consist of social support, family function  
33  
34 325 and accessibility to formal education. Social support comprises of the informal support from  
35  
36 326 immediate family members, friends, neighbours, and the community, while function  
37  
38 327 describes the extent to which the family function as a unit in supporting caregivers. The  
39  
40 328 findings related to these are described further below.

#### 41 329 ***Inadequate support from social networks***

42  
43  
44 330 Some caregivers indicated that they received minimal or no support from family members and  
45  
46 331 others in providing care for their children. Most caregivers expressed concerns that their  
47  
48 332 children may be abandoned in the event of their absence:

49  
50 333 *It is not easy to get someone to care for him, especially when I am not feeling well. I*  
51 334 *still have to manage and care for him because, the way he is, who will have time to take*  
52 335 *care of him? (p3, caregiver of a 4year, 9months boy).*

53  
54 336 As shown in the demographics, most caregivers were females and mothers to the children.  
55  
56 337 Although caregiving roles in Ghana are traditionally female, considering the additional care  
57  
58 338 needs of a child with CP, many mothers might benefit from support from spouses. It was clear,  
59  
60 339 however in the statements of most of the caregivers that we interviewed that spouses were

1  
2  
3 340 unsupportive and unhelpful most of the time – almost in rejecting the child with CP and their  
4  
5 341 caregiver.

6  
7 342 *With this one, my husband is not helping me care for him. Do you think I will try to give*  
8 343 *birth again? He does not mind us any longer. At least once in a while, he should also*  
9 344 *pick him, and I will also rest, but he doesn't. (p3, caregiver of a 4year, 9months boy)*

### 11 345 ***Inadequate access to formal education***

12 346 Another challenge caregivers encountered was that they could not find a suitable school that  
13  
14 347 would render quality education for their children. Some mothers felt their children would not  
15 348 be accepted into the mainstream schools due to their condition, and special schools were  
16  
17 349 unavailable. Thus, all schools within reach of caregivers were not resourced to admit children  
18  
19 350 with special needs like CP. Some community members who seem not to know the depth of the  
20  
21 351 child schooling problem kept recommending that the child be taken to school. See the following  
22  
23 352 expressions of participants.

24  
25  
26 353 *They said I should take her to school, but in our place, they will not admit her. They said she*  
27 354 *could not sit, and she could not walk... When you send her to these regular schools, they will*  
28 355 *not take her. Moreover, no school in our area trains such children (p11, caregiver of a 3year*  
29 356 *old girl).*

30  
31  
32 357

## 34 358 **Discussion**

35 359 Our findings show that caregivers in this context encounter sociocultural, physical, and  
36  
37 360 economic challenges in caring for their children with CP. The study's findings resonate with  
38  
39 361 existing evidence and signpost critical contextual and global issues that need consideration to  
40  
41 362 develop support systems and relevant interventions. To support policymakers, practitioners,  
42  
43 363 and researchers in the design of interventions, key findings of this study are discussed in three  
44  
45 364 domains: (i) individual level issues, (ii) community level and (iii) National level (See figure 2).  
46  
47 365 The study findings in these domains, according to existing literature, impact caregivers'  
48  
49 366 physical health, psychological health and general wellbeing (25,34–36).

### 50 367 **Figure 2: Contextual Framing of Caregivers' Experiences and Challenges**

51  
52  
53 368

54  
55 369

56  
57 370

58  
59  
60

### 371 **Individual level Issues**

372 Our finding indicates that caregivers of children with CP face physical care burdens and  
373 economic pressures. Due to muscle spasticity, weakness and uncoordinated motor control,  
374 children with CP rely mainly on their caregivers for physical care, irrespective of age (37).  
375 Although there are assistive devices for aiding in the care of sick individuals with  
376 neuromuscular inadequacies and self-care deficit (38), the caregivers in this study had to lift  
377 and move their children manually, without such devices, resulting in caregivers' altered  
378 wellbeing such as aches and pains sometimes requiring medical attention. Meanwhile, the  
379 wellbeing of caregivers is critical, considering that most children with CP depend solely on  
380 them for their care (39,40). Therefore, though it might be useful to solicit the support of social  
381 networks to assist primary caregivers, it might even be more beneficial for health professionals  
382 to assist caregivers in learning manual handling and body mechanics to empower them to safely  
383 lift and move children (41,42).

384 Also, at the individual level were the income cuts and increased expenditures of caregivers and  
385 their families. The loss of jobs, businesses, and increased healthcare expenditures for a child  
386 with CP necessitate employers and policymakers to create a more flexible work culture that  
387 allows caregivers to engage in income-generating activities to lessen their financial burden  
388 (15,43,44). Even though the economic challenges for caregivers in this study are unavoidable,  
389 considering that the setting is generally a deprived area, the absence or limited financial support  
390 could limit caregivers' ability to access health care such as rehabilitation services for the care  
391 of their child as reported in other studies (15). Specific to this study's setting and similar  
392 populations, it might be beneficial if the current cost-sharing system of the National Health  
393 Insurance Scheme (45) is re-evaluated to meet the health financing needs of these marginalised  
394 populations with CP.

### 395 **Community level**

396 The relations of children with CP, the general public and caregivers misunderstand CP  
397 especially in settings with limited general literacy (46), leading to the attribution of the  
398 condition to supernatural causes, such as punishment from the gods and witchcraft, as reported  
399 in this study and others (46,47). In our study context, Children with CP were perceived as spirit  
400 children and punished by the gods. These perceptions were translated into the level of  
401 community engagement with the caregivers and the children. Existing evidence shows that  
402 beliefs in witchcraft and punishment by the gods lead to labelling, stigmatisation and

1  
2  
3 403 discrimination against families and children with CP (47). Lack of support for caregivers  
4 404 resulting from stigma has been reported in the existing literature (11,17). This limited support  
5 405 could compound the inherent challenges of having a child with special needs. Thus, society's  
6 406 understanding of CP is critical in reducing stigmatisation and discrimination against families  
7 407 with children with CP and the associated cyclical effect on the child and caregiver. It is  
8 408 therefore critical that health information on CP is intensified to ensure that communities  
9 409 understand the causes and course of CP, promoting empathy and involvement of support  
10 410 systems in providing care for the child to improve their quality of life.

### 17 411 **National level**

18 412 The study's findings suggest that primary caregivers received limited or no health information  
19 413 about their child's condition. Limited information on health issues and services is a global  
20 414 challenge (48–50). However, challenging settings such as Ghana, with limited economic  
21 415 independence, are worst in this regard(43,51–55). Anecdotal evidence from the study setting  
22 416 suggests that health professionals provide ad hoc health education to caregivers of children  
23 417 with CP and other disabilities, using medical terms that caregivers and their support systems  
24 418 may not understand. Yet, there is evidence that adequate caregiver knowledge may promote  
25 419 better care for children with CP (55,56). Indeed, the trend of breaching the gap in service users'  
26 420 understanding of health issues and contributing effectively to service provision is through  
27 421 deliberate efforts to ensure public participation (57). Therefore, to forestall the challenges  
28 422 communities encounter with their health management, conscious efforts must be made to utilise  
29 423 evidence such as that identified in this study and introduce appropriate interventions that ensure  
30 424 optimal public participation in health care at every health service level.

31 425 Furthermore, existing evidence suggest that children with CP without cognitive impairment  
32 426 could benefit from formal education (58). Nevertheless, caregivers reported that one of their  
33 427 challenges was finding school placement for their children with CP. Although Ghana has an  
34 428 all-inclusive education policy (59), it thus appear most schools in this setting do not have the  
35 429 capacity in terms of human resources and space to admit children with CP. This situation  
36 430 resonates with other study findings in India and Kenya reporting lack of formal education  
37 431 opportunities (43,60,61). This suggests the need to operationalise educational policies that  
38 432 makes formal education more accessible to all including children with CP.



1  
2  
3 433 Conclusively, though the study findings might not be generalisable, it raises issues related to  
4 434 child physical care, cultural perceptions, health information, and educational needs that must  
5 435 be translated into appropriate individual, community and national level response.  
6  
7  
8

9 436 **Funding statement:** This research received no specific grant from any funding agency in the  
10 437 public, commercial or not-for-profit sectors.  
11  
12

13 438 **Competing interests' statement:** No competing interests to declare.  
14

15 439 **Author contribution:** MMM, YNA and MWK conceptualise the study, methodology, and  
16 440 literature review. MMM and JNS undertook the data collection, transcription, and analysis.  
17 441 YNA reviewed transcript compared with audios, JNS and MWK drafted the manuscript. MWK  
18 442 and MMM reviewed manuscript for intellectual content. All authors read and approved the  
19 443 final manuscript for publication.  
20  
21  
22  
23

24 444 **Data Availability:** All data relevant to the study are included in the article and its  
25 445 supplementary.  
26  
27  
28

#### 29 446 **Patient and Public Involvement**

30 447 Patients or the public were not involved in the design, or conduct, or reporting, or dissemination  
31 448 plans of our research.  
32  
33  
34

#### 35 449 **References**

- 36 450  
37 451  
38 452  
39 453  
40 454  
41 455  
42 456  
43 457  
44 458  
45 459  
46 460  
47 461  
48 462  
49 463  
50 464  
51 465  
52 466
1. Cans C. Surveillance of cerebral palsy in Europe: a collaboration of cerebral palsy surveys and registers. Surveillance of Cerebral Palsy in Europe (SCPE). Dev Med Child Neurol [Internet]. 2000 [cited 2023 May 1];42(12):816–24. Available from: <https://pubmed.ncbi.nlm.nih.gov/11132255/>
  2. KINSNER-OVASKAINEN A, LANZONI M. Surveillance of cerebral palsy in Europe: Development of the JRC-SCPE central database and public health indicators. 2017 [cited 2023 May 1]; Available from: <https://publications.jrc.ec.europa.eu/repository/handle/JRC109418>
  3. Rosenbaum P, Paneth N, Leviton A, Goldstein M, Bax M, Damiano D, et al. A report: the definition and classification of cerebral palsy April 2006 - PubMed. Dev Med Child Neurol [Internet]. 2007 [cited 2023 May 1];49(6):8–14. Available from: <https://pubmed.ncbi.nlm.nih.gov/17370477/>
  4. McIntyre S, Taitz D, Keogh J, Goldsmith S, Badawi N, Blair E. A systematic review of risk factors for cerebral palsy in children born at term in developed countries. Dev Med Child Neurol [Internet]. 2013 Jun 1 [cited 2022 Nov 16];55(6):499–508. Available from: <https://onlinelibrary.wiley.com/doi/full/10.1111/dmnc.12017>
  5. Sellier E, Platt MJ, Andersen GL, Krägeloh-Mann I, De La Cruz J, Cans C, et al. Decreasing prevalence in cerebral palsy: a multi-site European population-based study, 1980 to 2003.

- 1  
2  
3 467 Dev Med Child Neurol [Internet]. 2016 Jan 1 [cited 2022 Nov 16];58(1):85–92. Available from:  
4 468 <https://onlinelibrary.wiley.com/doi/full/10.1111/dmcn.12865>
- 6 469 6. Oskoui M, Coutinho F, Dykeman J, Jetté N, Pringsheim T. An update on the prevalence of  
7 470 cerebral palsy: a systematic review and meta-analysis. Dev Med Child Neurol [Internet]. 2013  
8 471 Jun [cited 2022 Nov 16];55(6):509–19. Available from:  
9 472 <https://pubmed.ncbi.nlm.nih.gov/23346889/>
- 11 473 7. Chounti A, Hägglund G, Wagner P, Westbom L. Sex differences in cerebral palsy incidence and  
12 474 functional ability: a total population study. Acta Paediatr [Internet]. 2013 [cited 2022 Nov  
13 475 16];102(7):712–7. Available from: <https://pubmed.ncbi.nlm.nih.gov/23551760/>
- 16 476 8. Fitzmaurice C, Allen C, Barber RM, Barregard L, Bhutta ZA, Brenner H, et al. Global, Regional,  
17 477 and National Cancer Incidence, Mortality, Years of Life Lost, Years Lived With Disability, and  
18 478 Disability-Adjusted Life-years for 32 Cancer Groups, 1990 to 2015: A Systematic Analysis for  
19 479 the Global Burden of Disease Study. JAMA Oncol. 2017 Apr;3(4):524–48.
- 21 480 9. Van Naarden Braun K, Doernberg N, Schieve L, Christensen D, Goodman A, Yeargin-Allsopp  
22 481 M. Birth Prevalence of Cerebral Palsy: A Population-Based Study. Pediatrics [Internet]. 2016  
23 482 Jan 1 [cited 2022 Oct 27];137(1). Available from:  
24 483 <https://pubmed.ncbi.nlm.nih.gov/26659459/>
- 27 484 10. Kyeremateng JDA, Edusei A, Dogbe JA, Opoku MP, Nketsia W, Hammond C, et al. Experiences  
28 485 of primary caregivers of children with cerebral palsy across the trajectory of diagnoses in  
29 486 Ghana. Afr J Disabil. 2019;8.
- 31 487 11. Majnemer A, Shevell M, Law M, Poulin C, Rosenbaum P. Indicators of distress in families of  
32 488 children with cerebral palsy. Disabil Rehabil [Internet]. 2012 [cited 2022 Nov  
33 489 16];34(14):1202–7. Available from: <https://pubmed.ncbi.nlm.nih.gov/22235883/>
- 35 490 12. Raina P, O'Donnell M, Rosenbaum P, Brehaut J, Walter SD, Russell D, et al. The health and  
36 491 well-being of caregivers of children with cerebral palsy. Pediatrics [Internet]. 2005 Jun [cited  
37 492 2022 Oct 4];115(6). Available from: <https://pubmed.ncbi.nlm.nih.gov/15930188/>
- 39 493 13. Galpin J, Barratt P, Ashcroft E, Greathead S, Kenny L, Pellicano E. “The dots just don’t join up”:  
40 494 Understanding the support needs of families of children on the autism spectrum. Autism  
41 495 [Internet]. 2018 Jul 1 [cited 2022 Nov 16];22(5):571–84. Available from:  
42 496 <https://pubmed.ncbi.nlm.nih.gov/28449587/>
- 45 497 14. Rajan AM, John R. Resilience and impact of children’s intellectual disability on Indian parents.  
46 498 <https://doi.org/10.1177/1744629516654588> [Internet]. 2017 Feb 7 [cited 2022 Nov  
47 499 16];21(4):315–24. Available from:  
48 500 [https://journals.sagepub.com/doi/10.1177/1744629516654588?url\\_ver=Z39.88-  
49 501 2003&rfr\\_id=ori%3Arid%3Acrossref.org&rfr\\_dat=cr\\_pub++0pubmed](https://journals.sagepub.com/doi/10.1177/1744629516654588?url_ver=Z39.88-2003&rfr_id=ori%3Arid%3Acrossref.org&rfr_dat=cr_pub++0pubmed)
- 52 502 15. Nuri RP, Aldersey HM, Ghahari S. Needs of families of children with cerebral palsy in  
53 503 Bangladesh: A qualitative study. Child Care Health Dev [Internet]. 2019 Jan 1 [cited 2022 Nov  
54 504 16];45(1):36–44. Available from: <https://pubmed.ncbi.nlm.nih.gov/30304759/>
- 56 505 16. Romley JA, Shah AK, Chung PJ, Elliott MN, Vestal KD, Schuster MA. Family-Provided Health  
57 506 Care for Children With Special Health Care Needs. Pediatrics [Internet]. 2017 Jan 1 [cited  
58 507 2022 Nov 16];139(1):e20161287–e20161287. Available from:  
59 508 <https://europepmc.org/article/med/28028202>

- 1  
2  
3 509 17. Dambi JM, Jelsma J, Mlambo T. Caring for a child with Cerebral Palsy: The experience of  
4 510 Zimbabwean mothers. *Afr J Disabil* [Internet]. 2015 Aug 13 [cited 2022 Nov 16];4(1). Available  
5 511 from: /pmc/articles/PMC5433478/  
6  
7 512 18. Hamzat THK, Mordi EL. Impact of caring for children with cerebral palsy on the general health  
8 513 of their caregivers in an African community. *Int J Rehabil Res* [Internet]. 2007 Sep [cited 2022  
9 514 Oct 4];30(3):191–4. Available from: <https://pubmed.ncbi.nlm.nih.gov/17762763/>  
10  
11 515 19. Alase A. The Interpretative Phenomenological Analysis (IPA): A Guide to a Good Qualitative  
12 516 Research Approach. *International Journal of Education and Literacy Studies* [Internet]. 2017  
13 517 Apr 30 [cited 2023 Mar 12];5(2):9–19. Available from:  
14 518 <https://journals.aiac.org.au/index.php/IJELS/article/view/3400>  
15  
16 519 20. Creswell JW, Poth CN. *Qualitative Inquiry & Research Design + 30 Essential Skills for the*  
17 520 *Qualitative Researcher*. sage [Internet]. 2017 [cited 2022 Oct 27];459. Available from:  
18 521 <https://market.android.com/details?id=book-yMEKMQAACAAJ>  
19  
20 522 21. van Manen M. *Researching lived experience: Human science for an action sensitive*  
21 523 *pedagogy: Second Ed. Researching Lived Experience: Human Science for an Action Sensitive*  
22 524 *Pedagogy: Second Edition* [Internet]. 2016 Jun 16 [cited 2023 Mar 12];1–202. Available from:  
23 525 [https://www.taylorfrancis.com/books/mono/10.4324/9781315421056/researching-lived-](https://www.taylorfrancis.com/books/mono/10.4324/9781315421056/researching-lived-experience-max-van-manen)  
24 526 [experience-max-van-manen](https://www.taylorfrancis.com/books/mono/10.4324/9781315421056/researching-lived-experience-max-van-manen)  
25  
26 527 22. Van Manen M. But Is It Phenomenology? <https://doi.org/10.1177/1049732317699570>  
27 528 [Internet]. 2017 Mar 23 [cited 2023 Mar 12];27(6):775–9. Available from:  
28 529 <https://journals.sagepub.com/doi/full/10.1177/1049732317699570>  
29  
30 530 23. Neubauer BE, Witkop CT, Varpio L. How phenomenology can help us learn from the  
31 531 experiences of others. *Perspect Med Educ* [Internet]. 2019 Apr 1 [cited 2023 Mar 12];8(2):90–  
32 532 7. Available from: <https://pubmed.ncbi.nlm.nih.gov/30953335/>  
33  
34 533 24. Spiegelberg Herbert. *Doing Phenomenology : Essays on and in Phenomenology*. 2012 [cited  
35 534 2023 Mar 12];320. Available from:  
36 535 [https://books.google.com/books/about/Doing\\_Phenomenology.html?id=BmUyBwAAQBAJ](https://books.google.com/books/about/Doing_Phenomenology.html?id=BmUyBwAAQBAJ)  
37  
38 536 25. Raina P, O'Donnell M, Schwellnus H, Rosenbaum P, King G, Brehaut J, et al. Caregiving  
39 537 process and caregiver burden: Conceptual models to guide research and practice. *BMC*  
40 538 *Pediatr* [Internet]. 2004 Jan 14 [cited 2023 Apr 30];4(1):1–13. Available from:  
41 539 <https://bmcpediatr.biomedcentral.com/articles/10.1186/1471-2431-4-1>  
42  
43 540 26. Lalvani P, Polvere L. Historical perspectives on studying families of children with disabilities: A  
44 541 case for critical research. *Disabil Stud Q* [Internet]. 2013 [cited 2023 May 1];33(3). Available  
45 542 from: <https://dsq-sds.org/article/view/3209/3291>  
46  
47 543 27. Ghana Statistical Service. 2010 population & housing census : summary report of final results.  
48 544 Accra: Ghana Statistical Service; 2012.  
49  
50 545 28. Dworkin SL. Sample Size Policy for Qualitative Studies Using In-Depth Interviews. *Archives of*  
51 546 *Sexual Behavior* 2012 41:6 [Internet]. 2012 Sep 12 [cited 2022 Nov 16];41(6):1319–20.  
52 547 Available from: <https://link.springer.com/article/10.1007/s10508-012-0016-6>  
53  
54 548 29. Mason M. Sample Size and Saturation in PhD Studies Using Qualitative Interviews. *Forum*  
55 549 *Qualitative Sozialforschung* [Internet]. 2010 [cited 2022 Nov 16];11(3). Available from:

- 1  
2  
3 550 [https://www.researchgate.net/publication/47408617\\_Sample\\_Size\\_and\\_Saturation\\_in\\_PhD\\_](https://www.researchgate.net/publication/47408617_Sample_Size_and_Saturation_in_PhD_Studies_Using_Qualitative_Interviews)  
4 551 [Studies\\_Using\\_Qualitative\\_Interviews](https://www.researchgate.net/publication/47408617_Sample_Size_and_Saturation_in_PhD_Studies_Using_Qualitative_Interviews)  
5  
6 552 30. Britten N. Qualitative interviews in healthcare. [Internet]. 2nd ed. Pope C, May N, editors.  
7 553 London: BMJ Books; 2006 [cited 2022 Jul 15]. 11–19 p. Available from:  
8 554 [https://scholar.google.com/scholar\\_lookup?title=Qualitative%20interviews%20in%20healthc](https://scholar.google.com/scholar_lookup?title=Qualitative%20interviews%20in%20healthc)  
9 555 [are&pages=11-19&publication\\_year=1999&author=Britten%2CN](https://scholar.google.com/scholar_lookup?title=Qualitative%20interviews%20in%20healthc)  
10  
11  
12 556 31. Stuckey H. The first step in Data Analysis: Transcribing and managing qualitative research  
13 557 data. *Journal of Social Health and Diabetes*. 2014 Jun;02(01):006–8.  
14  
15 558 32. Fossey E, Harvey C, McDermott F, Davidson L. Understanding and evaluating qualitative  
16 559 research. *Aust N Z J Psychiatry* [Internet]. 2002 Dec [cited 2022 Oct 4];36(6):717–32. Available  
17 560 from: <https://pubmed.ncbi.nlm.nih.gov/12406114/>  
18  
19 561 33. Elo S, Kyngäs H. The qualitative content analysis process. *J Adv Nurs* [Internet]. 2008 Apr 1  
20 562 [cited 2022 Oct 27];62(1):107–15. Available from:  
21 563 <https://onlinelibrary.wiley.com/doi/full/10.1111/j.1365-2648.2007.04569.x>  
22  
23 564 34. Eicher PS, Batshaw ML. Cerebral palsy. *Pediatr Clin North Am* [Internet]. 1993 [cited 2023  
24 565 May 1];40(3):537–51. Available from: <https://pubmed.ncbi.nlm.nih.gov/8493064/>  
25  
26 566 35. King G, King S, Rosenbaum P, Goffin R. Family-centered caregiving and well-being of parents  
27 567 of children with disabilities: linking process with outcome. *J Pediatr Psychol* [Internet]. 1999  
28 568 Feb 1 [cited 2023 May 1];24(1):41–53. Available from:  
29 569 <https://academic.oup.com/jpepsy/article/24/1/41/902577>  
30  
31  
32 570 36. Wallander J, Varni J, Babani L, Banis H, DeHaan C, Wilcox K. Disability parameters, chronic  
33 571 strain, and adaptation of physically handicapped children and their mothers. *J Pediatr Psychol*  
34 572 [Internet]. 1989 [cited 2023 May 1];14(1):23–42. Available from:  
35 573 <https://academic.oup.com/jpepsy/article-abstract/14/1/23/973997>  
36  
37 574 37. Elangkovan IT, Shorey S. Experiences and Needs of Parents Caring for Children with Cerebral  
38 575 Palsy: A Systematic Review. *J Dev Behav Pediatr* [Internet]. 2020 Dec 1 [cited 2022 Nov  
39 576 28];41(9):730–9. Available from: <https://pubmed.ncbi.nlm.nih.gov/33136702/>  
40  
41  
42 577 38. Patel DR, Neelakantan M, Pandher K, Merrick J. Cerebral palsy in children: a clinical overview.  
43 578 *Transl Pediatr* [Internet]. 2020 [cited 2022 Nov 28];9(Suppl 1):S125–35. Available from:  
44 579 <https://pubmed.ncbi.nlm.nih.gov/32206590/>  
45  
46 580 39. Gokcin Eminel A, Kahraman T, Genc A. Physical workload during caregiving activities and  
47 581 related factors among the caregivers of children with cerebral palsy. *Ir J Med Sci* [Internet].  
48 582 2021 May 1 [cited 2022 Nov 28];190(2):701–9. Available from:  
49 583 <https://pubmed.ncbi.nlm.nih.gov/32789552/>  
50  
51 584 40. Grigger K. Cerebral palsy: an overview. . *Am Fam Physician* [Internet]. 2006 [cited 2022 Nov  
52 585 28];73:91–100. Available from:  
53 586 <https://www.google.com/search?q=KRIGGER%2C+K.+W.+2006.+Cerebral+palsy%3A+an+over>  
54 587 [view.+American+family+physician%2C+73%2C+91-](https://www.google.com/search?q=KRIGGER%2C+K.+W.+2006.+Cerebral+palsy%3A+an+over)  
55 588 [100.&oq=KRIGGER%2C+K.+W.+2006.+Cerebral+palsy%3A+an+overview.+American+family+p](https://www.google.com/search?q=KRIGGER%2C+K.+W.+2006.+Cerebral+palsy%3A+an+over)  
56 589 [hysician%2C+73%2C+91-100.&aqs=chrome..69i57.1052j0j7&sourceid=chrome&ie=UTF-8](https://www.google.com/search?q=KRIGGER%2C+K.+W.+2006.+Cerebral+palsy%3A+an+over)  
57  
58  
59  
60

- 1  
2  
3 590 41. Asuquo EG, Tighe SM, Bradshaw C. Interventions to reduce work-related musculoskeletal  
4 591 disorders among healthcare staff in nursing homes; An integrative literature review. *Int J*  
5 592 *Nurs Stud Adv*. 2021 Nov 1;3:100033.
- 7 593 42. Prall J, Ross M. The management of work-related musculoskeletal injuries in an occupational  
8 594 health setting: the role of the physical therapist. *J Exerc Rehabil* [Internet]. 2019 Apr 1 [cited  
9 595 2022 Nov 28];15(2):193. Available from: /pmc/articles/PMC6509454/
- 11 596 43. Vadivelan K, Sekar P, Sruthi SS, Gopichandran V. Burden of caregivers of children with  
12 597 cerebral palsy: An intersectional analysis of gender, poverty, stigma, and public policy. *BMC*  
13 598 *Public Health* [Internet]. 2020 May 8 [cited 2022 Nov 16];20(1):1–8. Available from:  
14 599 <https://bmcpublichealth.biomedcentral.com/articles/10.1186/s12889-020-08808-0>
- 17 600 44. Chiluba BC, Moyo G. Caring for a cerebral palsy child: a caregivers perspective at the  
18 601 University Teaching Hospital, Zambia. *BMC Res Notes* [Internet]. 2017 Dec 8 [cited 2022 Nov  
19 602 16];10(1). Available from: <https://pubmed.ncbi.nlm.nih.gov/29221493/>
- 21 603 45. Akweongo P, Aikins M, Wyss K, Salari P, Tediosi F. Insured clients out-of-pocket payments for  
22 604 health care under the national health insurance scheme in Ghana. *BMC Health Serv Res*  
23 605 [Internet]. 2021 Dec 1 [cited 2022 Nov 29];21(1):1–14. Available from:  
24 606 <https://bmchealthservres.biomedcentral.com/articles/10.1186/s12913-021-06401-8>
- 27 607 46. Baffoe M. Stigma, Discrimination & Marginalization: Gateways to Oppression of Persons with  
28 608 Disabilities in Ghana, West Africa, Michael Baffoe – WATHI. *Africa Journal of Educational and*  
29 609 *Social Research*, 3(1), 187-187 [Internet]. 2013 [cited 2022 Nov 16];3(1):187–187. Available  
30 610 from: [https://www.wathi.org/stigma-discrimination-marginalization-gateways-to-oppression-](https://www.wathi.org/stigma-discrimination-marginalization-gateways-to-oppression-of-persons-with-disabilities-in-ghana-west-africa-michael-baffoe/)  
31 611 [of-persons-with-disabilities-in-ghana-west-africa-michael-baffoe/](https://www.wathi.org/stigma-discrimination-marginalization-gateways-to-oppression-of-persons-with-disabilities-in-ghana-west-africa-michael-baffoe/)
- 33 612 47. Opoku MP, Peprah Opoku M, Alupo BA, Gyamfi N, Odame L, Mprah WK, et al. The Family and  
34 613 Disability in Ghana: Highlighting Gaps in Achieving Social Inclusion. *Disability, CBR & Inclusive*  
35 614 *Development* [Internet]. 2018 Mar 16 [cited 2022 Nov 16];28(4):41. Available from:  
36 615 <http://dcidj.org//articles/10.5463/dcid.v28i4.666/>
- 39 616 48. Avery JC, Braunack-Mayer AJ. The information needs of women diagnosed with Polycystic  
40 617 Ovarian Syndrome--implications for treatment and health outcomes. *BMC Womens Health*  
41 618 [Internet]. 2007 Jun 20 [cited 2022 Nov 29];7. Available from:  
42 619 <https://pubmed.ncbi.nlm.nih.gov/17578583/>
- 44 620 49. Budtz S, Witt K. Consulting the Internet before visit to general practice. Patients' use of the  
45 621 Internet and other sources of health information. *Scand J Prim Health Care* [Internet]. 2002  
46 622 Sep [cited 2022 Nov 29];20(3):174–6. Available from:  
47 623 <https://pubmed.ncbi.nlm.nih.gov/12389756/>
- 50 624 50. Clarke MA, Moore JL, Steege LM, Koopman RJ, Belden JL, Canfield SM, et al. Health  
51 625 information needs, sources, and barriers of primary care patients to achieve patient-centered  
52 626 care: A literature review. *Health Informatics J* [Internet]. 2016 Dec 1 [cited 2022 Nov  
53 627 29];22(4):992–1016. Available from:  
54 628 [https://journals.sagepub.com/doi/10.1177/1460458215602939?url\\_ver=Z39.88-](https://journals.sagepub.com/doi/10.1177/1460458215602939?url_ver=Z39.88-2003&rfr_id=ori%3Arid%3Acrossref.org&rfr_dat=cr_pub++0pubmed)  
55 629 [2003&rfr\\_id=ori%3Arid%3Acrossref.org&rfr\\_dat=cr\\_pub++0pubmed](https://journals.sagepub.com/doi/10.1177/1460458215602939?url_ver=Z39.88-2003&rfr_id=ori%3Arid%3Acrossref.org&rfr_dat=cr_pub++0pubmed)
- 58 630 51. Atakro CA, Atakro A, Aboagye JS, Blay AA, Addo SB, Agyare DF, et al. Older people's  
59 631 challenges and expectations of healthcare in Ghana: A qualitative study. *PLoS One* [Internet].

- 1  
2  
3 632 2021 Jan 1 [cited 2022 Nov 16];16(1):e0245451. Available from:  
4 633 <https://journals.plos.org/plosone/article?id=10.1371/journal.pone.0245451>
- 5  
6 634 52. Priyadharishini J, Sadan V, Prashanth, Sebastian T. Community - Based intervention package  
7 635 on knowledge, attitude and selected skills of home care among primary care givers of  
8 636 children with cerebral palsy. Indian Journal of Continuing Nursing Education [Internet]. 2017  
9 637 [cited 2022 Nov 16];18(2):46. Available from: <https://www.ijcne.org/article.asp?issn=2230-7354;year=2017;volume=18;issue=2;spage=46;epage=50;aualast=Priyadharishini>  
10 638
- 11 639 53. Resch JA, Mireles G, Benz MR, Grenwelge C, Peterson R, Zhang D. Giving parents a voice: A  
12 640 qualitative study of the challenges experienced by parents of children with disabilities.  
13 641 Rehabil Psychol [Internet]. 2010 May [cited 2022 Nov 16];55(2):139–50. Available from:  
14 642 </record/2010-09922-004>
- 15 643 54. Singogo C, Mweshi M, Rhoda A. Challenges experienced by mothers caring for children with  
16 644 cerebral palsy in Zambia. S Afr J Physiother [Internet]. 2015 Apr 28 [cited 2022 Nov 16];71(1).  
17 645 Available from: </pmc/articles/PMC6093109/>
- 18 646 55. Zuurmond M, Nyante G, Baltussen M, Seeley J, Abanga J, Shakespeare T, et al. A support  
19 647 programme for caregivers of children with disabilities in Ghana: Understanding the impact on  
20 648 the wellbeing of caregivers. Child Care Health Dev [Internet]. 2019 Jan 1 [cited 2022 Nov  
21 649 16];45(1):45–53. Available from: <https://pubmed.ncbi.nlm.nih.gov/30259548/>
- 22 650 56. Adams MS, Khan NZ, Begum SA, Wirz SL, Hesketh T, Pring TR. Feeding difficulties in children  
23 651 with cerebral palsy: low-cost caregiver training in Dhaka, Bangladesh. Child Care Health Dev  
24 652 [Internet]. 2012 Nov [cited 2022 Nov 16];38(6):878–88. Available from:  
25 653 <https://pubmed.ncbi.nlm.nih.gov/22082112/>
- 26 654 57. Florin D, Dixon J. Public involvement in health care. BMJ : British Medical Journal [Internet].  
27 655 2004 Jan 1 [cited 2022 Nov 29];328(7432):159. Available from: </pmc/articles/PMC314519/>
- 28 656 58. Gillies MB, Bowen JR, Patterson JA, Roberts CL, Torvaldsen S. Educational outcomes for  
29 657 children with cerebral palsy: a linked data cohort study. Dev Med Child Neurol [Internet].  
30 658 2018 Apr 1 [cited 2022 Nov 29];60(4):397–401. Available from:  
31 659 <https://pubmed.ncbi.nlm.nih.gov/29278268/>
- 32 660 59. Ministry of Education. Inclusive Education Policy | UNICEF Ghana [Internet]. 2015 [cited 2022  
33 661 Nov 29]. Available from: <https://www.unicef.org/ghana/reports/inclusive-education-policy>
- 34 662 60. Geere JL, Gona J, Omondi FO, Kifalu MK, Newton CR, Hartley S. Caring for children with  
35 663 physical disability in Kenya: potential links between caregiving and carers' physical health.  
36 664 Child [Internet]. 2013 May [cited 2022 Nov 16];39(3):381. Available from:  
37 665 </pmc/articles/PMC3654176/>
- 38 666 61. Vanderpuye I. Piloting inclusive education in Ghana: parental perceptions, expectations and  
39 667 involvement. PhD thesis, University of Leeds. [Leeds]: University of Leeds; 2013.
- 40  
41  
42  
43  
44  
45  
46  
47  
48  
49  
50  
51  
52  
53  
54 668  
55  
56 669  
57  
58  
59  
60

1  
2  
3  
4  
5  
6  
7  
8  
9  
10  
11  
12  
13  
14  
15  
16  
17  
18  
19  
20  
21  
22  
23  
24  
25  
26  
27  
28  
29  
30  
31  
32  
33  
34  
35  
36  
37  
38  
39  
40  
41  
42  
43  
44  
45  
46  
47  
48  
49  
50  
51  
52  
53  
54  
55  
56  
57  
58  
59  
60

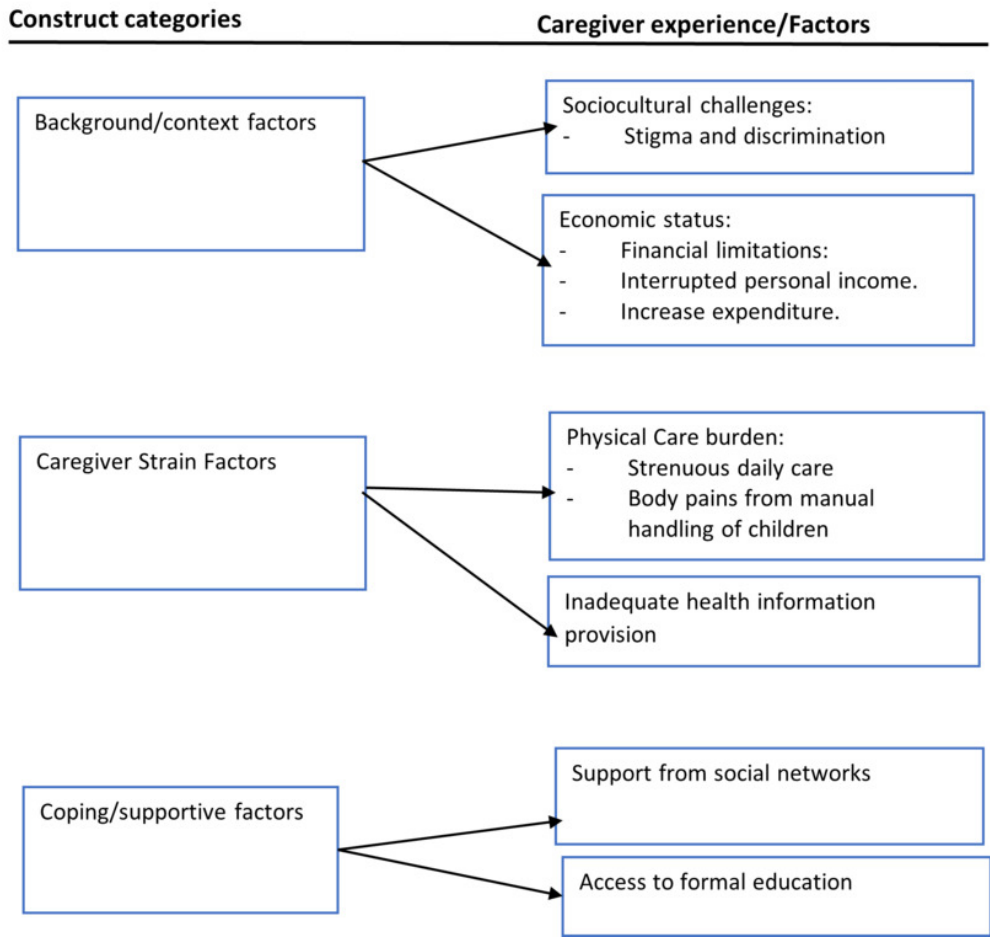

Multidimensional experiences and challenges of caregivers

45x43mm (450 x 450 DPI)

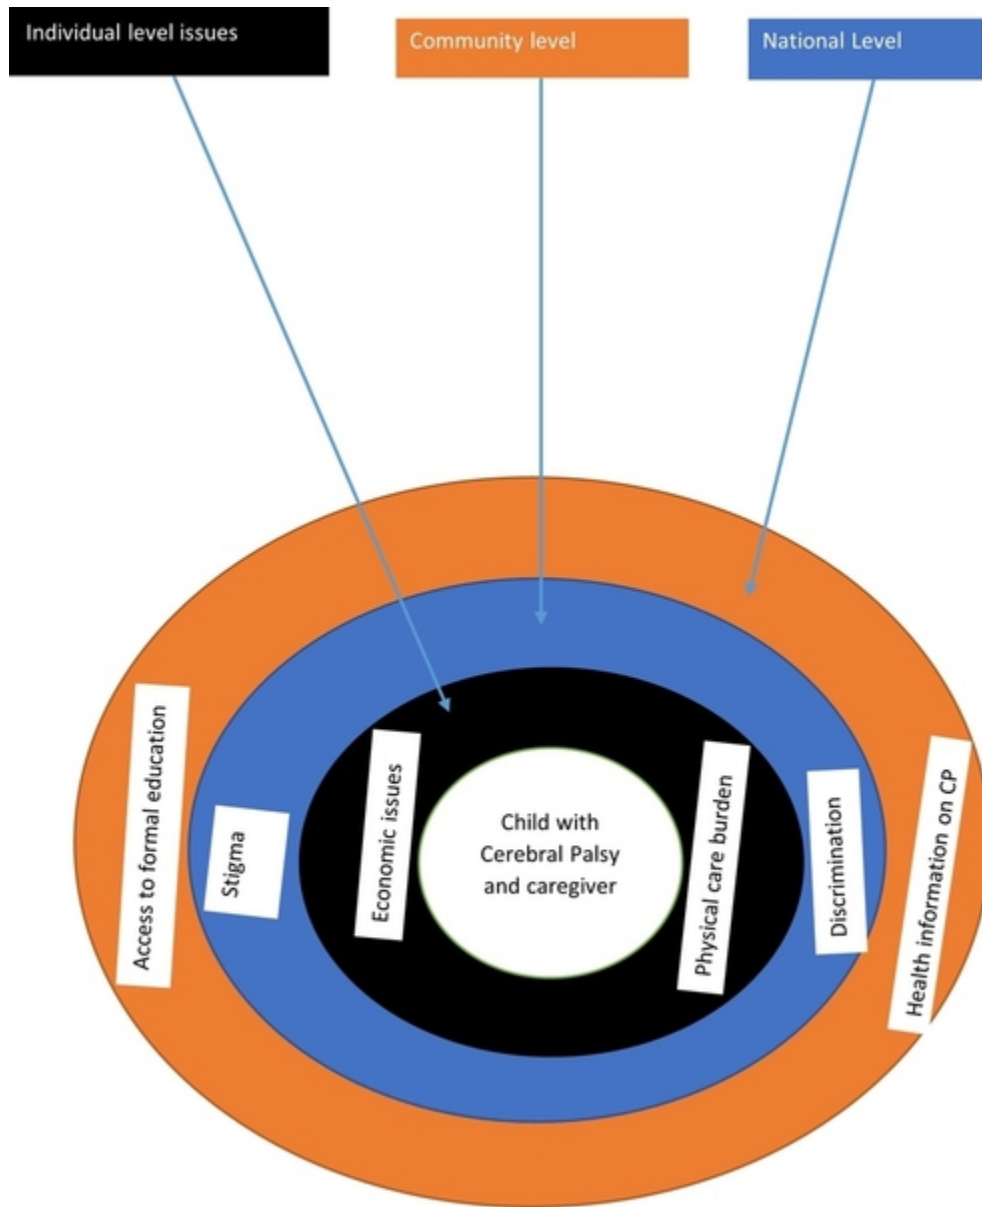

Contextual Framing of Caregivers' Experiences and Challenges

41x50mm (300 x 300 DPI)



## Supplementary File 1: Interview guide

| A. Demographic data child and caregiver                                                                                                                                                                                                                                                                                                             |  | Comment/ details |
|-----------------------------------------------------------------------------------------------------------------------------------------------------------------------------------------------------------------------------------------------------------------------------------------------------------------------------------------------------|--|------------------|
| <ul style="list-style-type: none"> <li>• Relationship of caregiver to child</li> <li>• Age of caregiver</li> <li>• Educational level of caregiver</li> <li>• Occupation of Caregiver</li> <li>• Marital status of Caregiver</li> <li>• Age of child</li> <li>• Type of cerebral palsy</li> </ul>                                                    |  |                  |
| Interview guide                                                                                                                                                                                                                                                                                                                                     |  |                  |
| <p>1. Tell me about your experience of caring for a child with cerebral palsy?</p> <p>Probes: Ask probing questions base on response of each participant.</p> <p>2. Tell me about any challenges that you experience in your role as a caregiver.</p> <p>Probes: Ask probing question to explore details of challenges mentioned by caregivers.</p> |  |                  |
