# Supplementary material for: Family caregivers’ experience of care with a child with cerebral palsy: the lived experiences and challenges of caregivers in a resource-limited setting in northern Ghana
Source: PubMed Central journal article supplement — BMJ Paediatr Open. 2023 Jul 5;7(1):e001807. doi: 10.1136/bmjpo-2022-001807 (PMC10335558; doi:10.1136/bmjpo-2022-001807), 2023-07-05
Supplement: bmjpo-2022-001807supp001.pdf [file bmjpo-2022-001807supp001.pdf]

## Supplementary File 1: Interview guide

| A. Demographic data child and caregiver                                                                                                                                                                                                                                                                                                             |                  |
|-----------------------------------------------------------------------------------------------------------------------------------------------------------------------------------------------------------------------------------------------------------------------------------------------------------------------------------------------------|------------------|
|                                                                                                                                                                                                                                                                                                                                                     | Comment/ details |
| <ul style="list-style-type: none"> <li>• Relationship of caregiver to child</li> <li>• Age of caregiver</li> <li>• Educational level of caregiver</li> <li>• Occupation of Caregiver</li> <li>• Marital status of Caregiver</li> <li>• Age of child</li> <li>• Type of cerebral palsy</li> </ul>                                                    |                  |
| Interview guide                                                                                                                                                                                                                                                                                                                                     |                  |
| <p>1. Tell me about your experience of caring for a child with cerebral palsy?</p> <p>Probes: Ask probing questions base on response of each participant.</p> <p>2. Tell me about any challenges that you experience in your role as a caregiver.</p> <p>Probes: Ask probing question to explore details of challenges mentioned by caregivers.</p> |                  |
